# Supplementary material for: Visible light catalyzed reaction of α-bromochalcones with chalcones: direct access to the urundeuvine scaffold
Source: Royal Society of Chemistry journal article supplement (doi:10.1039/c8ob01881b), 2018-01-01
Supplement: c8ob01881b1.pdf [file c8ob01881b1.pdf]

Supporting Information

**Visible Light Catalyzed Reaction of  $\alpha$ -Bromochalcones with Chalcones:  
Direct Access to the Urundevine Scaffold**

Bhupal Singh Karki,<sup>a,b</sup> Mukund M. D. Pramanik,<sup>a,b</sup> Ruchir Kant,<sup>c</sup> and Namrata Rastogi<sup>a,b\*</sup>

<sup>a</sup>Medicinal & Process Chemistry Division and <sup>c</sup>Molecular and Structural Biology Division, CSIR-Central Drug Research Institute, B.S. 10/1, Sector 10, Jankipuram extension, Sitapur Road, Lucknow 226031, India

<sup>b</sup>Academy of Scientific and Innovative Research, New Delhi 110001, India

\* Corresponding author. e-mail: namrata.rastogi@cdri.res.in

**Table of Contents**

|                                                                                             |              |
|---------------------------------------------------------------------------------------------|--------------|
| 1. Experimental Section.....                                                                | <b>1-3</b>   |
| 2. Spectroscopic Data.....                                                                  | <b>3-13</b>  |
| 3. Crystallographic Data.....                                                               | <b>14-15</b> |
| 4. HPLC Chromatogram of the Product Mixture of Reaction between <b>1s</b> & <b>2h</b> ..... | <b>16</b>    |
| 5. References.....                                                                          | <b>17</b>    |
| 6. Copies of <sup>1</sup> H and <sup>13</sup> C NMR Spectra.....                            | <b>18-74</b> |

## 1. Experimental Section

### 1.1 General experimental information

All reactions were monitored by TLC, visualization was effected with UV and/or by developing in iodine. Melting points were recorded on a Precision melting point apparatus and are uncorrected. NMR spectra were recorded on a Bruker Avance spectrometer at 400 or 500 MHz ( $^1\text{H}$ ) and 100 MHz ( $^{13}\text{C}$ ). Chemical shifts are reported in  $\delta$  (ppm) relative to TMS as the internal standard. To describe spin multiplicity, standard abbreviations such as s, d, t, q, m, dd referring to singlet, doublet, triplet, quartet, multiplet and doublet of doublet respectively, are used. The ESI-HRMS spectra were recorded on Agilent 6520-Q-ToF LC/MS system. The NMR yields of products were calculated through  $^1\text{H}$  NMR of crude reaction mixture using dibromo methane as internal standard and isolated yields were calculated after purification by column chromatography. Preparative HPLC was conducted on a 1200 infinity series system (Pumps, 1260 Prep. Pumps; Diode Array Detector, 1260 DAD VL; Fraction collector, 1260 FC-PS; Sampler, 1260 manual injector and Open LAB CDS software) from Agilent Technologies. Reverse phase column (Agilent 10 Prep-C18, 150 x 30 mm) was used and acetonitrile (Pump A, flow rate 20 ml/min) and water with 0.1 % TFA (Pump B, flow rate 4 ml/min) were used as mobile phase with isocratic elution.

All the chemicals and catalysts were purchased from commercial sources and used as received except DMSO which was freshly distilled over  $\text{CaH}_2$  before the reaction. The chalcones **1a-1s** are known compounds and were synthesized following literature protocols.<sup>1</sup> Similarly, all the  $\alpha$ -bromochalcones except **2c** and **2f** are known compounds and were synthesized according to the reported procedure.<sup>2</sup>

### 1.2 General procedure for the photoredox catalyzed reaction

In an oven dried 5 mL snap vial equipped with a magnetic stirring bar, the  $\alpha$ -bromochalcone **2** (0.3 mmol), chalcone **1** (0.6 mmol, 2.0 equiv),  $\text{K}_3\text{PO}_4$  (0.13 g, 0.6 mmol, 2.0 equiv) and photocatalyst *fac*-Ir(ppy)<sub>3</sub> (0.002 g, 0.003 mmol, 1.0 mol%) were dissolved in anhydrous DMSO (3 mL). The resulting reaction mixture was degassed by three “pump-freeze-thaw” cycles via a syringe needle. The vial was irradiated using 450 nm blue LEDs with a cooling device maintaining the temperature around 25 °C. After 36 h of irradiation (TLC monitoring), the reaction mixture was diluted with water (10 mL) and extracted with ethyl acetate (3 x 10 mL). The combined organic layers were dried ( $\text{Na}_2\text{SO}_4$ ) and concentrated under reduced pressure. The residue was purified by column chromatography on silica gel using hexane/ethyl acetate as eluent to afford the pure product **3**.

### 1.3 General procedure for the oxidation of dihydronaphthalenes

The dihydronaphthalene **3** (0.1 mmol) and ammonium acetate (0.31 g, 0.4 mmol, 4.0 equiv) were dissolved in acetic acid (5 mL) and the reaction mixture was refluxed for 9-12 h (TLC monitoring). The reaction mixture was diluted with water (10 mL) and extracted with ethyl acetate (3 x 10 mL). The combined organic layers were dried (Na<sub>2</sub>SO<sub>4</sub>) and concentrated under reduced pressure. The residue was purified by column chromatography on silica gel using hexane/ethyl acetate as eluent to afford the pure product **4**.

### 2. Spectroscopic Data

#### **(Z)-2-bromo-1-(5-bromo-2,4-dimethoxyphenyl)-3-(2-bromo-4,5-dimethoxyphenyl) prop-2-en-1-one (2c).**

Yellow solid; *R<sub>f</sub>* 0.50 (25% EtOAc/hexane); Mp 163-164 °C; <sup>1</sup>H NMR (400 MHz, CDCl<sub>3</sub>) δ 7.79 (s, 1H), 7.68 (s, 1H), 7.58 (s, 1H), 7.00 (s, 1H), 6.44 (s, 1H), 3.91 (s, 3H), 3.84 (s, 3H), 3.85 (s, 3H), 3.79 (s, 3H); <sup>13</sup>C NMR (100 MHz, CDCl<sub>3</sub>) δ 188.78, 159.21, 158.57, 150.94, 147.81, 141.81, 134.32, 126.06, 125.16, 120.56, 117.11, 115.31, 112.99, 102.23, 96.34, 56.47, 56.25, 56.23, 56.15; HRMS for C<sub>19</sub>H<sub>17</sub>Br<sub>3</sub>O<sub>5</sub>: calcd. (M+H)<sup>+</sup>: 562.8699, found: 562.8697

#### **(Z)-2-bromo-3-phenyl-1-(thiophen-2-yl)prop-2-en-1-one (2f).**

Yellow oil; *R<sub>f</sub>* 0.50 (5% EtOAc/hexane); <sup>1</sup>H NMR (400 MHz, CDCl<sub>3</sub>) δ 7.77-7.80 (m, 3H), 7.74 (dd, *J* = 3.8 Hz, 1.1 Hz, 1H), 7.68 (dd, *J* = 5.0 Hz, 1.2 Hz, 1H), 7.36-7.40 (m, 3H), 7.10 (dd, *J* = 5.0 Hz, 3.8 Hz, 1H); <sup>13</sup>C NMR (100 MHz, CDCl<sub>3</sub>) δ 183.03, 141.35, 140.02, 135.12, 134.81, 133.68, 130.25, 130.13, 128.57, 128.15, 120.78; HRMS for C<sub>13</sub>H<sub>9</sub>BrOS: calcd. (M+H)<sup>+</sup>: 292.9630, found: 292.9633

#### **(1-(4-Methoxyphenyl)-1,2-dihydronaphthalene-2,3-diyl)bis(phenylmethanone) (3a).**

White solid; isolated yield 75% (69 mg). *R<sub>f</sub>* 0.50 (10% EtOAc/hexane); Mp 123-125 °C; <sup>1</sup>H NMR (400 MHz, CDCl<sub>3</sub>) δ 7.90-7.92 (m, 2H), 7.64-7.66 (m, 2H), 7.46-7.49 (m, 2H), 7.39 (d, *J* = 7.9 Hz, 3H), 7.36 (d, *J* = 3.2 Hz, 2H), 7.14-7.23 (m, 3H), 7.00-7.04 (m, 2H), 6.90-6.94 (m, 1H), 6.69-6.73 (m, 2H), 5.16 (d, *J* = 4.0 Hz, 1H), 4.43 (d, *J* = 4.0 Hz, 1H), 3.67 (s, 3H); <sup>13</sup>C NMR (100 MHz, CDCl<sub>3</sub>) δ 198.91, 196.36, 158.60, 142.07, 137.84, 137.31, 136.18, 135.04, 134.67, 132.92, 131.94, 131.61, 130.83, 129.49, 129.43, 129.07, 128.78, 128.74, 128.64, 128.28, 127.59, 114.19, 55.26, 49.68, 46.27; HRMS for C<sub>31</sub>H<sub>24</sub>O<sub>3</sub>: calcd. (M+H)<sup>+</sup>: 445.1798, found: 445.1804

**(1-Phenyl-1,2-dihydronaphthalene-2,3-diyl)bis(phenylmethanone) (3b).** Yellow solid; isolated yield 72% (89 mg). *R<sub>f</sub>* 0.50 (10% EtOAc/hexane); Mp 97-98 °C; <sup>1</sup>H NMR (400 MHz, CDCl<sub>3</sub>) δ 7.99 (d, *J* = 7.6 Hz, 2H), 7.72 (d, *J* = 7.0 Hz, 2H), 7.53-7.57 (m, 2H), 7.44-

7.47 (m, 5H), 7.24-7.31 (m, 5H), 7.17-7.20 (m, 3H), 6.99-7.01 (m, 1H), 5.25 (d,  $J = 3.9$  Hz, 1H), 4.54 (d,  $J = 3.8$  Hz, 1H);  $^{13}\text{C}$  NMR (100 MHz,  $\text{CDCl}_3$ )  $\delta$  198.76, 196.31, 142.88, 142.12, 137.82, 136.88, 136.12, 134.61, 132.95, 131.95, 131.73, 130.85, 129.51, 129.42, 129.16, 128.82, 128.80, 128.65, 128.28, 127.74, 127.70, 127.11, 49.51, 47.02; HRMS for  $\text{C}_{30}\text{H}_{22}\text{O}_2$ : calcd. (M+H) $^+$ : 415.1693, found: 415.1688

**(3-Benzoyl-1-(p-tolyl)-1,2-dihydronaphthalen-2-yl)(4-methoxyphenyl)methanone (3c).**

White solid; isolated yield 51% (70 mg).  $R_f$  0.50 (10% EtOAc/hexane); Mp 112-113 °C;  $^1\text{H}$  NMR (400 MHz,  $\text{CDCl}_3$ )  $\delta$  7.92-7.95 (m, 2H), 7.64-7.66 (m, 2H), 7.45-7.49 (m, 1H), 7.35-7.39 (m, 3H), 7.14-7.22 (m, 3H), 7.00 (br s, 4H), 6.92-6.94 (m, 1H), 6.86-6.88 (m, 2H), 5.12 (d,  $J = 3.3$  Hz, 1H), 4.41 (d,  $J = 3.3$  Hz, 1H), 3.80 (s, 3H), 2.21 (s, 3H);  $^{13}\text{C}$  NMR (100 MHz,  $\text{CDCl}_3$ )  $\delta$  196.96, 196.40, 163.52, 142.12, 140.36, 137.97, 137.25, 136.66, 134.56, 131.86, 131.66, 131.19, 130.77, 129.50, 129.45, 129.16, 128.68, 128.25, 127.53, 127.47, 113.89, 55.49, 48.99, 46.78, 20.99; HRMS for  $\text{C}_{32}\text{H}_{26}\text{O}_3$ : calcd. (M+H) $^+$ : 459.1955, found: 459.1960

**(3-Benzoyl-1-(4-methoxyphenyl)-1,2-dihydronaphthalen-2-yl)(p-tolyl)methanone (3d).**

Yellow gummy solid; isolated yield 55% (75 mg).  $R_f$  0.50 (15% EtOAc/hexane);  $^1\text{H}$  NMR (400 MHz,  $\text{CDCl}_3$ )  $\delta$  7.84 (d,  $J = 8.6$  Hz, 2H), 7.63-7.67 (m, 2H), 7.46-7.50 (m, 1H), 7.35-7.40 (m, 3H), 7.14-7.23 (m, 5H), 7.01-7.05 (m, 2H), 6.91-6.93 (m, 1H), 6.71-6.74 (m, 2H), 5.14 (d,  $J = 3.6$  Hz, 1H), 4.42 (d,  $J = 3.3$  Hz, 1H), 3.69 (s, 3H), 2.35 (s, 3H);  $^{13}\text{C}$  NMR (100 MHz,  $\text{CDCl}_3$ )  $\delta$  198.26, 196.38, 158.56, 143.76, 142.04, 137.93, 137.33, 135.32, 134.61, 133.42, 131.88, 131.63, 130.77, 129.44, 129.38, 129.10, 128.97, 128.66, 128.25, 127.55, 114.18, 55.26, 49.41, 46.28, 21.65; HRMS for  $\text{C}_{32}\text{H}_{26}\text{O}_3$ : calcd. (M+H) $^+$ : 459.1955, found: 459.1958

**(3-Benzoyl-1-(4-methoxyphenyl)-1,2-dihydronaphthalen-2-yl)(2-methoxyphenyl)**

**methanone (3e).** Yellow gummy solid; isolated yield 45% (64 mg).  $R_f$  0.50 (20% EtOAc/hexane);  $^1\text{H}$  NMR (400 MHz,  $\text{CDCl}_3$ )  $\delta$  7.56-7.58 (m, 2H), 7.43-7.47 (m, 1H), 7.32-7.39 (m, 4H), 7.21 (s, 1H), 7.17-7.19 (m, 3H), 6.95-7.01 (m, 3H), 6.85-6.90 (m, 2H), 6.67-6.70 (m, 2H), 5.27 (d,  $J = 2.3$  Hz, 1H), 4.53 (d,  $J = 1.9$  Hz, 1H), 3.74 (s, 3H), 3.67 (s, 3H);  $^{13}\text{C}$  NMR (100 MHz,  $\text{CDCl}_3$ )  $\delta$  200.60, 196.21, 158.24, 157.70, 140.85, 138.11, 137.68, 135.52, 134.66, 132.98, 131.88, 131.68, 130.50, 130.41, 129.41, 129.29, 129.21, 128.45, 128.13, 127.91, 127.47, 120.79, 113.79, 111.46, 55.60, 55.21, 52.99, 44.87; HRMS for  $\text{C}_{32}\text{H}_{26}\text{O}_4$ : calcd. (M+H) $^+$ : 475.1904, found: 475.1902

**(3-Benzoyl-1-(4-methoxyphenyl)-1,2-dihydronaphthalen-2-yl)(3-methoxyphenyl)**

**methanone (3f).** Yellow gummy solid; isolated yield 50% (71 mg).  $R_f$  0.50 (20% EtOAc/hexane);  $^1\text{H}$  NMR (400 MHz,  $\text{CDCl}_3$ )  $\delta$  7.65-7.67 (m, 2H), 7.58 (d,  $J = 7.6$  Hz, 1H),

7.46-7.50 (m, 1H), 7.37-7.40 (m, 4H), 7.31 (t,  $J = 8.0$  Hz, 1H), 7.16-7.24 (m, 3H), 7.02-7.05 (m, 3H), 6.93-6.95 (m, 1H), 6.73 (d,  $J = 8.6$  Hz, 2H), 5.13 (d,  $J = 3.7$  Hz, 1H), 4.45 (d,  $J = 3.5$  Hz, 1H), 3.74 (s, 3H), 3.68 (s, 3H);  $^{13}\text{C}$  NMR (100 MHz,  $\text{CDCl}_3$ )  $\delta$  198.58, 196.30, 159.91, 158.63, 142.00, 137.87, 137.52, 137.33, 135.11, 134.59, 131.94, 131.62, 130.84, 129.60, 129.48, 129.42, 129.12, 128.72, 128.28, 127.60, 121.36, 119.82, 114.22, 112.85, 55.40, 55.26, 49.84, 46.26; HRMS for  $\text{C}_{32}\text{H}_{26}\text{O}_4$ : calcd. (M+H) $^+$ : 475.1904, found: 475.1898

**(3-Benzoyl-1-(4-methoxyphenyl)-1,2-dihydronaphthalen-2-yl)(4-methoxyphenyl)**

**methanone (3g).** Yellow gummy solid; isolated yield 62% (88 mg).  $R_f$  0.50 (15% EtOAc/hexane);  $^1\text{H}$  NMR (400 MHz,  $\text{CDCl}_3$ )  $\delta$  7.93 (d,  $J = 8.8$  Hz, 2H), 7.66 (d,  $J = 7.1$  Hz, 2H), 7.46-7.49 (m, 1H), 7.34-7.40 (m, 3H), 7.15-7.22 (m, 3H), 7.03 (d,  $J = 8.6$  Hz, 2H), 6.91-6.93 (m, 1H), 6.87 (d,  $J = 8.8$  Hz, 2H), 6.72 (d,  $J = 8.6$  Hz, 2H), 5.12 (d,  $J = 3.8$  Hz, 1H), 4.42 (d,  $J = 3.7$  Hz, 1H), 3.80 (s, 3H), 3.68 (s, 3H);  $^{13}\text{C}$  NMR (100 MHz,  $\text{CDCl}_3$ )  $\delta$  197.25, 196.45, 163.50, 158.56, 142.00, 137.94, 137.46, 135.39, 134.73, 131.89, 131.61, 131.15, 130.76, 129.46, 129.07, 128.82, 128.69, 128.26, 127.51, 114.19, 113.88, 55.49, 55.26, 49.19, 46.50; HRMS for  $\text{C}_{32}\text{H}_{26}\text{O}_4$ : calcd. (M+H) $^+$ : 475.1904, found: 475.1894

**(3-Benzoyl-1-(4-(methylthio)phenyl)-1,2-dihydronaphthalen-2-yl)(4-methoxyphenyl)**

**methanone (3h).** Yellow solid; isolated yield 60% (88 mg).  $R_f$  0.50 (15% EtOAc/hexane); Mp 108-109  $^\circ\text{C}$ ;  $^1\text{H}$  NMR (400 MHz,  $\text{CDCl}_3$ )  $\delta$  7.92 (d,  $J = 8.9$  Hz, 2H), 7.66 (d,  $J = 7.1$  Hz, 2H), 7.46-7.49 (m, 1H), 7.34-7.40 (m, 3H), 7.15-7.22 (m, 3H), 7.06 (dd,  $J = 21.1$  Hz, 8.4 Hz, 4H), 6.91-6.93 (m, 1H), 6.82-6.88 (m, 2H), 5.12 (d,  $J = 3.6$  Hz, 1H), 4.41 (d,  $J = 3.6$  Hz, 1H), 3.79 (s, 3H), 2.36 (s, 3H);  $^{13}\text{C}$  NMR (100 MHz,  $\text{CDCl}_3$ )  $\delta$  197.00, 196.36, 163.56, 141.93, 140.18, 137.88, 137.13, 136.92, 134.60, 131.93, 131.63, 131.14, 130.81, 129.51, 129.45, 129.08, 128.72, 128.28, 128.16, 127.67, 127.18, 113.92, 55.49, 48.91, 46.72, 15.96; HRMS for  $\text{C}_{32}\text{H}_{26}\text{O}_3\text{S}$ : calcd. (M+H) $^+$ : 491.1675, found: 491.1674

**(3-Benzoyl-1-(4-fluorophenyl)-1,2-dihydronaphthalen-2-yl)(4-ethoxyphenyl)methanone**

**(3i).** White solid; isolated yield 57% (79 mg).  $R_f$  0.50 (10% EtOAc/hexane); Mp 99-101  $^\circ\text{C}$ ;  $^1\text{H}$  NMR (400 MHz,  $\text{CDCl}_3$ )  $\delta$  7.89 (d,  $J = 8.8$  Hz, 2H), 7.65 (d,  $J = 7.2$  Hz, 2H), 7.45-7.49 (m, 1H), 7.33-7.39 (m, 3H), 7.16-7.22 (m, 3H), 7.05-7.08 (m, 2H), 6.84-6.90 (m, 5H), 5.10 (d,  $J = 4.2$  Hz, 1H), 4.45 (d,  $J = 4.1$  Hz, 1H), 3.78 (s, 3H);  $^{13}\text{C}$  NMR (100 MHz,  $\text{CDCl}_3$ )  $\delta$  197.24, 196.36, 163.58, 161.81 (d,  $J = 244.5$  Hz), 141.73, 138.82 (d,  $J = 3.5$  Hz), 137.81, 136.98, 134.77, 132.00, 131.61, 131.06, 130.84, 129.53, 129.44, 129.32 (d,  $J = 7.9$  Hz), 128.96, 128.87, 128.29, 127.74, 115.64 (d,  $J = 21.3$  Hz), 113.92, 55.48, 49.16, 46.60; HRMS for  $\text{C}_{31}\text{H}_{23}\text{FO}_3$ : calcd. (M+H) $^+$ : 463.1704, found: 463.1705

**(3-Benzoyl-1-(4-fluorophenyl)-1,2-dihydronaphthalen-2-yl)(4-fluorophenyl)methanone**

**(3j).** White solid; isolated yield 45% (60 mg).  $R_f$  0.50 (15% EtOAc/hexane); Mp 136-138 °C;  $^1\text{H NMR}$  (400 MHz,  $\text{CDCl}_3$ )  $\delta$  7.89 (dd,  $J = 8.6$  Hz, 5.4 Hz, 2H), 7.65 (d,  $J = 7.2$  Hz, 2H), 7.49 (t,  $J = 7.5$  Hz, 1H), 7.39 (t,  $J = 7.6$  Hz, 2H), 7.34 (s, 1H), 7.19-7.22 (m, 3H), 7.01-7.08 (m, 4H), 6.85-6.91 (m, 3H), 5.10 (d,  $J = 5.2$  Hz, 1H), 4.46 (d,  $J = 5.2$  Hz, 1H);  $^{13}\text{C NMR}$  (100 MHz,  $\text{CDCl}_3$ )  $\delta$  197.98, 196.31, 165.70 (d,  $J = 253.4$  Hz), 161.87 (d,  $J = 244.5$  Hz), 141.92, 138.16, 137.55, 136.91, 134.86, 132.78, 132.7, 131.48, 131.27 (d,  $J = 9.3$  Hz), 131.01, 129.60, 129.54, 129.46, 129.40, 128.81, 128.37, 127.83, 115.72 (d,  $J = 21.1$  Hz), 49.78, 46.73; **HRMS** for  $\text{C}_{30}\text{H}_{20}\text{F}_2\text{O}_2$ : calcd. (M+H) $^+$ : 451.1504, found: 451.1503

**(1-(4-Chlorophenyl)-1,2-dihydronaphthalene-2,3-diyl)bis(phenylmethanone) (3k).** White solid; isolated yield 65% (87 mg).  $R_f$  0.50 (10% EtOAc/hexane); Mp 119-120 °C;  $^1\text{H NMR}$  (400 MHz,  $\text{CDCl}_3$ )  $\delta$  7.86-7.88 (m, 2H), 7.60-7.62 (m, 2H), 7.45-7.49 (m, 2H), 7.35-7.39 (m, 4H), 7.33 (s, 1H), 7.12-7.20 (m, 5H), 7.01 (d,  $J = 8.9$  Hz, 2H), 6.88-6.90 (m, 1H), 5.12 (d,  $J = 4.0$  Hz, 1H), 4.43 (d,  $J = 4.0$  Hz, 1H);  $^{13}\text{C NMR}$  (100 MHz,  $\text{CDCl}_3$ )  $\delta$  198.58, 196.21, 141.87, 141.29, 137.67, 136.43, 136.09, 134.42, 133.07, 132.95, 132.06, 131.60, 130.97, 129.63, 129.40, 129.11, 129.02, 128.96, 128.71, 128.32, 127.91, 49.33, 46.34; **HRMS** for  $\text{C}_{30}\text{H}_{21}\text{ClO}_2$ : calcd. (M+H) $^+$ : 449.1303, found: 449.1313

**(3-Benzoyl-1-(3-nitrophenyl)-1,2-dihydronaphthalen-2-yl)(4-methoxyphenyl) methanone**

**(3l).** Yellow gummy solid; isolated yield 52% (76 mg).  $R_f$  0.50 (20% EtOAc/hexane);  $^1\text{H NMR}$  (400 MHz,  $\text{CDCl}_3$ )  $\delta$  7.99-8.00 (m, 2H), 7.89 (d,  $J = 8.7$  Hz, 2H), 7.65 (d,  $J = 7.3$  Hz, 2H), 7.45-7.49 (m, 2H), 7.37-7.41 (m, 4H), 7.19-7.28 (m, 4H), 6.92 (br d,  $J = 6.8$  Hz, 1H), 6.86 (br d,  $J = 8.7$  Hz, 2H), 5.13 (d,  $J = 3.7$  Hz, 1H), 4.59 (d,  $J = 3.5$  Hz, 1H), 3.79 (s, 3H);  $^{13}\text{C NMR}$  (100 MHz,  $\text{CDCl}_3$ )  $\delta$  196.45, 196.18, 163.75, 148.55, 144.99, 141.74, 137.56, 135.68, 134.26, 133.93, 132.18, 131.59, 131.15, 131.04, 129.89, 129.83, 129.43, 128.88, 128.55, 128.38, 128.29, 122.79, 122.24, 114.05, 55.53, 48.65, 46.82; **HRMS** for  $\text{C}_{31}\text{H}_{23}\text{NO}_5$ : calcd. (M+H) $^+$ : 490.1649, found: 490.1646

**(3-Benzoyl-1-phenyl-1,2-dihydronaphthalen-2-yl)(pyridin-2-yl)methanone (3m).**

White solid; isolated yield 60% (74 mg).  $R_f$  0.50 (15% EtOAc/hexane); Mp 135-136 °C;  $^1\text{H NMR}$  (400 MHz,  $\text{CDCl}_3$ )  $\delta$  8.69-8.71 (m, 1H), 7.90-7.92 (m, 1H), 7.71-7.75 (m, 1H), 7.58-7.61 (m, 2H), 7.43-7.48 (m, 1H), 7.38-7.41 (m, 1H), 7.33-7.37 (m, 3H), 7.16-7.25 (m, 7H), 7.08-7.12 (m, 1H), 6.90-6.92 (m, 1H), 5.78 (d,  $J = 4.0$  Hz, 1H), 4.74 (d,  $J = 4.0$  Hz, 1H);  $^{13}\text{C NMR}$  (100 MHz,  $\text{CDCl}_3$ )  $\delta$  198.58, 196.08, 152.32, 148.79, 142.80, 141.86, 137.82, 136.93, 135.29, 132.51, 131.80, 130.61, 129.43, 129.29, 129.22, 128.39, 128.26, 128.20, 127.66, 127.02,

126.73, 122.92, 48.92, 46.35; **HRMS** for  $C_{29}H_{21}NO_2$ : calcd. (M+H)<sup>+</sup>: 416.1645, found: 416.1641

**(3-Benzoyl-1-phenyl-1,2-dihydronaphthalen-2-yl)(thiophen-2-yl)methanone (3n)**. Yellow solid; isolated yield 47% (60 mg). *R<sub>f</sub>* 0.50 (15% EtOAc/hexane); Mp 97-98 °C; **<sup>1</sup>H NMR** (400 MHz, CDCl<sub>3</sub>) δ 7.77 (dd, *J* = 3.8 Hz, 1.0 Hz, 1H), 7.64-7.66 (m, 2H), 7.57 (dd, *J* = 5.0 Hz, 1.1 Hz, 1H), 7.46-7.50 (m, 1H), 7.36-7.40 (m, 3H), 7.18-7.24 (m, 5H), 7.13-7.15 (m, 3H), 7.06 (dd, *J* = 5.0 Hz, 3.8 Hz, 1H), 6.96-6.98 (m, 1H), 4.97 (d, *J* = 4.1 Hz, 1H), 4.56 (d, *J* = 4.2 Hz, 1H); **<sup>13</sup>C NMR** (100 MHz, CDCl<sub>3</sub>) δ 196.22, 191.25, 142.96, 142.91, 142.27, 137.75, 136.94, 134.09, 133.91, 132.67, 132.01, 131.68, 130.96, 129.54, 129.44, 129.17, 128.85, 128.31, 128.26, 127.85, 127.70, 127.16, 51.44, 47.65; **HRMS** for  $C_{28}H_{20}O_2S$ : calcd. (M+H)<sup>+</sup>: 421.1257, found: 421.1260

**1-(3-Benzoyl-1-phenyl-1,2-dihydronaphthalen-2-yl)butan-1-one (3o)**. Yellow gummy solid; isolated yield 52% (59 mg). *R<sub>f</sub>* 0.50 (10% EtOAc/hexane); **<sup>1</sup>H NMR** (400 MHz, CDCl<sub>3</sub>) δ 7.62 (d, *J* = 7.1 Hz, 2H), 7.47-7.50 (m, 1H), 7.37-7.40 (m, 2H), 7.15-7.23 (m, 7H), 7.07 (d, *J* = 7.1 Hz, 2H), 7.00 (d, *J* = 7.0 Hz, 1H), 4.57 (d, *J* = 5.5 Hz, 1H), 4.23 (d, *J* = 5.5 Hz, 1H), 2.47-2.55 (m, 1H), 2.14-2.25 (m, 1H), 1.38-1.45 (m, 2H), 0.71 (t, *J* = 7.4 Hz, 3H); **<sup>13</sup>C NMR** (100 MHz, CDCl<sub>3</sub>) δ 209.68, 196.71, 142.26, 141.40, 137.84, 137.67, 135.01, 132.02, 131.62, 130.95, 129.31, 129.26, 128.93, 128.74, 128.36, 128.10, 127.59, 127.04, 54.92, 46.45, 44.12, 16.78, 13.58; **HRMS** for  $C_{27}H_{24}O_2$ : calcd. (M+H)<sup>+</sup>: 381.1849, found: 381.1853

**(3-Benzoyl-1-phenyl-1,2-dihydronaphthalen-2-yl)(cyclopropyl)methanone (3p)**. White solid; isolated yield 45% (51 mg). *R<sub>f</sub>* 0.50 (10% EtOAc/hexane); Mp 147-148 °C; **<sup>1</sup>H NMR** (400 MHz, CDCl<sub>3</sub>) δ 7.63-7.65 (m, 2H), 7.47-7.51 (m, 1H), 7.37-7.41 (m, 2H), 7.13-7.24 (m, 7H), 7.05-7.09 (m, 3H), 4.67 (d, *J* = 4.4 Hz, 1H), 4.52 (d, *J* = 4.5 Hz, 1H), 1.92-1.99 (m, 1H), 0.83-0.92 (s, 1H), 0.63-0.82 (s, 3H); **<sup>13</sup>C NMR** (100 MHz, CDCl<sub>3</sub>) δ 208.64, 196.67, 142.52, 141.36, 137.98, 137.83, 134.25, 131.99, 131.47, 130.98, 129.37, 129.30, 129.05, 128.66, 128.34, 127.97, 127.53, 126.93, 55.20, 45.94, 20.09, 11.40, 11.28; **HRMS** for  $C_{27}H_{22}O_2$ : calcd. (M+H)<sup>+</sup>: 379.1693, found: 379.1686

**Ethyl 3-benzoyl-1-phenyl-1,2-dihydronaphthalene-2-carboxylate (3q)**. White gummy solid; isolated yield 52% (59 mg). *R<sub>f</sub>* 0.50 (15% EtOAc/hexane); **<sup>1</sup>H NMR** (400 MHz, CDCl<sub>3</sub>) δ 7.65 (d, *J* = 7.0 Hz, 2H), 7.46-7.50 (m, 1H), 7.36-7.40 (m, 2H), 7.16-7.23 (m, 6H), 7.13 (d, *J* = 7.1 Hz, 1H), 7.09 (d, *J* = 7.0 Hz, 1H), 7.04 (d, *J* = 7.1 Hz, 2H), 4.75 (d, *J* = 4.0 Hz, 1H), 4.29 (d, *J* = 4.1 Hz, 1H), 3.98 (q, *J* = 7.1 Hz, 2H), 1.00 (t, *J* = 7.1 Hz, 3H); **<sup>13</sup>C NMR** (100 MHz, CDCl<sub>3</sub>) δ 192.52, 168.54, 138.41, 136.01, 134.26, 133.56, 129.95, 128.22,

127.85, 127.08, 125.69, 125.51, 124.87, 124.57, 124.13, 123.96, 123.23, 57.47, 43.39, 42.38, 10.28; **HRMS** for C<sub>26</sub>H<sub>22</sub>O<sub>3</sub>: calcd. (M+H)<sup>+</sup>: 383.1642, found: 383.1638

**(3-Benzoyl-6-methyl-4-phenyl-3,4-dihydronaphthalen-2-yl)(p-tolyl)methanone (3r).**

Yellow oil; isolated yield 56% (74 mg). *R<sub>f</sub>* 0.50 (10% EtOAc/hexane); **<sup>1</sup>H NMR** (400 MHz, CDCl<sub>3</sub>) δ 7.95 (d, *J* = 7.3 Hz, 2H), 7.55 (d, *J* = 8.0 Hz, 2H), 7.47-7.51 (m, 1H), 7.41 (d, *J* = 7.8 Hz, 2H), 7.37-7.38 (poorly resolved m, 1H), 7.17-7.22 (m, 5H), 7.11-7.15 (m, 4H), 6.99-7.01 (poorly resolved m, 1H), 6.76 (br s, 1H), 5.14 (d, *J* = 3.6 Hz, 1H), 4.42 (d, *J* = 3.5 Hz, 1H), 2.36 (s, 3H), 2.19 (s, 3H); **<sup>13</sup>C NMR** (100 MHz, CDCl<sub>3</sub>) δ 198.70, 196.01, 143.16, 142.46, 141.92, 141.23, 136.77, 136.13, 135.20, 133.57, 132.88, 130.00, 129.56, 129.44, 129.23, 128.92, 128.83, 128.79, 128.62, 128.44, 127.70, 127.02, 49.57, 46.98, 21.61; **HRMS** for C<sub>32</sub>H<sub>26</sub>O<sub>2</sub>: calcd. (M+H)<sup>+</sup>: 443.2006, found: 443.2010

**(1-(4-Methoxyphenyl)-7-methyl-1,2-dihydronaphthalene-2,3-diyl)bis(p-tolylmethanone) (3s).**

Yellow solid; isolated yield 66% (92 mg). *R<sub>f</sub>* 0.50 (15% EtOAc/hexane); Mp 120-121 °C; **<sup>1</sup>H NMR** (400 MHz, CDCl<sub>3</sub>) δ 7.85 (d, *J* = 8.2 Hz, 2H), 7.55 (d, *J* = 8.0 Hz, 2H), 7.34 (s, 1H), 7.16-7.20 (m, 4H), 7.10 (br d, *J* = 7.7 Hz, 1H), 7.01-7.03 (m, 2H), 6.96 (br d, *J* = 7.7 Hz, 1H), 6.71-6.73 (m, 3H), 5.08 (d, *J* = 3.3 Hz, 1H), 4.35 (d, *J* = 3.2 Hz, 1H), 3.68 (s, 3H), 2.35 (s, 3H), 2.34 (s, 3H), 2.17 (s, 3H); **<sup>13</sup>C NMR** (100 MHz, CDCl<sub>3</sub>) δ 198.21, 196.07, 158.51, 143.65, 142.38, 141.83, 141.12, 137.22, 135.60, 135.32, 133.60, 133.45, 129.93, 129.59, 129.39, 129.35, 129.14, 129.00, 128.90, 128.63, 128.30, 114.16, 55.25, 49.48, 46.27, 21.64, 21.60; **HRMS** for C<sub>34</sub>H<sub>30</sub>O<sub>3</sub>: calcd. (M+H)<sup>+</sup>: 487.2268, found: 487.2267

**(3-(2-Methoxybenzoyl)-4-(4-methoxyphenyl)-6-methyl-3,4-dihydronaphthalen-2-yl)(p-tolyl) methanone (3t).**

Brown solid; isolated yield 60% (90 mg). *R<sub>f</sub>* 0.50 (20% EtOAc/hexane); Mp 145-146 °C; **<sup>1</sup>H NMR** (400 MHz, CDCl<sub>3</sub>) δ 7.45 (d, *J* = 7.2 Hz, 2H), 7.38-7.40 (m, 1H), 7.30-7.35 (m, 1H), 7.19 (s merged with CDCl<sub>3</sub> peak, 1H), 7.13 (d, *J* = 7.6 Hz, 2H), 7.07 (d, *J* = 7.6 Hz, 1H), 6.96 (d, *J* = 8.3 Hz, 3H), 6.83-6.89 (m, 3H), 6.68 (d, *J* = 7.6 Hz, 2H), 5.21 (br s, 1H), 4.49 (br s, 1H), 3.72 (s, 3H), 3.67 (s, 3H), 2.33 (s, 3H), 2.20 (s, 3H); **<sup>13</sup>C NMR** (100 MHz, CDCl<sub>3</sub>) δ 200.67, 195.90, 158.21, 157.68, 142.16, 140.81, 140.64, 137.72, 135.81, 135.46, 133.67, 132.86, 130.40, 130.01, 129.55, 129.32, 129.20, 128.77, 128.48, 128.19, 128.05, 120.73, 113.78, 111.44, 55.57, 55.21, 53.08, 44.86, 21.62, 21.58; **HRMS** for C<sub>34</sub>H<sub>30</sub>O<sub>4</sub>: calcd. (M+H)<sup>+</sup>: 503.2217, found: 503.2213

**(3-(3-Methoxybenzoyl)-4-(4-methoxyphenyl)-6-methyl-3,4-dihydronaphthalen-2-yl)(p-tolyl)methanone (3u).**

Yellow solid; isolated yield 53% (80 mg). *R<sub>f</sub>* 0.50 (20% EtOAc/hexane); Mp 98-101 °C; **<sup>1</sup>H NMR** (400 MHz, CDCl<sub>3</sub>) δ 7.57 (d, *J* = 7.8 Hz, 1H), 7.54 (d, *J* = 8.1 Hz, 2H), 7.40 (t, *J* = 2.2 Hz, 1H), 7.34 (s, 1H), 7.30 (t, *J* = 8.0 Hz, 1H), 7.17 (d, *J* =



8.0 Hz, 2H), 7.11 (d,  $J = 7.7$  Hz, 1H), 7.02 (d,  $J = 8.8$  Hz, 3H), 6.98 (d,  $J = 7.3$  Hz, 1H), 6.71-6.76 (m, 3H), 5.06 (d,  $J = 3.4$  Hz, 1H), 4.38 (d,  $J = 3.4$  Hz, 1H), 3.74 (s, 3H), 3.68 (s, 3H), 2.35 (s, 3H), 2.18 (s, 3H);  $^{13}\text{C}$  NMR (100 MHz,  $\text{CDCl}_3$ )  $\delta$  198.51, 196.02, 159.87, 158.55, 142.47, 141.82, 141.22, 137.49, 137.20, 135.38, 135.23, 133.54, 129.95, 129.57, 129.41, 129.10, 128.93, 128.68, 128.35, 121.41, 119.83, 114.17, 112.80, 55.40, 55.25, 49.88, 46.21, 21.63, 21.61; HRMS for  $\text{C}_{34}\text{H}_{30}\text{O}_4$ : calcd. (M+H) $^+$ : 503.2217, found: 503.2218

**(3-(4-Methoxybenzoyl)-6-methyl-4-(4-(methylthio)phenyl)-3,4-dihydronaphthalen-2-yl)(p-tolyl)methanone (3v).** Yellow solid; isolated yield 82% (127 mg).  $R_f$  0.50 (15% EtOAc/hexane); Mp 98-100 °C;  $^1\text{H}$  NMR (400 MHz,  $\text{CDCl}_3$ )  $\delta$  7.93 (d,  $J = 8.8$  Hz, 2H), 7.55 (d,  $J = 8.0$  Hz, 2H), 7.33 (s, 1H), 7.17 (d,  $J = 8.0$  Hz, 2H), 7.02-7.12 (m, 5H), 6.98 (d,  $J = 7.8$  Hz, 1H), 6.87 (d,  $J = 8.8$  Hz, 2H), 6.74 (s, 1H), 5.07 (d,  $J = 3.2$  Hz, 1H), 4.35 (d,  $J = 3.0$  Hz, 1H), 3.80 (s, 3H), 2.35, 2.37 (2s merged, 6H), 2.17 (s, 3H);  $^{13}\text{C}$  NMR (100 MHz,  $\text{CDCl}_3$ )  $\delta$  197.00, 196.06, 163.51, 142.45, 141.73, 141.18, 140.46, 137.00, 136.84, 135.28, 133.60, 131.17, 129.93, 129.59, 129.45, 129.13, 128.93, 128.77, 128.41, 128.15, 127.18, 113.89, 55.48, 48.98, 46.72, 21.61, 15.98; HRMS for  $\text{C}_{34}\text{H}_{30}\text{O}_3\text{S}$ : calcd. (M+H) $^+$ : 519.1988, found: 519.1992

**(3-Benzoyl-4-(4-fluorophenyl)-6-methyl-3,4-dihydronaphthalen-2-yl)(p-tolyl) methanone (3w).** White solid; isolated yield 45% (62 mg).  $R_f$  0.50 (10% EtOAc/hexane); Mp 92-94 °C;  $^1\text{H}$  NMR (500 MHz,  $\text{CDCl}_3$ )  $\delta$  7.90 (d,  $J = 7.4$  Hz, 2H), 7.54 (d,  $J = 8.0$  Hz, 2H), 7.47 (t,  $J = 7.6$  Hz, 1H), 7.37 (t,  $J = 7.8$  Hz, 2H), 7.33 (s, 1H), 7.17 (d,  $J = 8.0$  Hz, 2H), 7.12 (d,  $J = 7.7$  Hz, 1H), 7.04-7.07 (m, 2H), 7.00 (d,  $J = 7.5$  Hz, 1H), 6.86 (t,  $J = 8.6$  Hz, 2H), 6.72 (s, 1H), 5.10 (d,  $J = 4.0$  Hz, 1H), 4.41 (d,  $J = 4.0$  Hz, 1H), 2.35 (s, 3H), 2.17 (s, 3H);  $^{13}\text{C}$  NMR (100 MHz,  $\text{CDCl}_3$ )  $\delta$  198.88, 195.99, 161.78 (d,  $J = 244.0$  Hz), 142.60, 141.65, 141.35, 138.75 (d,  $J = 2.7$  Hz), 136.75, 136.25, 135.08, 133.61, 132.94, 129.81, 129.55, 129.51, 129.31 (d,  $J = 8.0$  Hz), 129.09, 128.96, 128.72, 128.64, 128.55, 115.60 (d,  $J = 21.2$  Hz), 49.69, 46.31, 21.62, 21.61; HRMS for  $\text{C}_{32}\text{H}_{25}\text{FO}_2$ : calcd. (M+H) $^+$ : 461.1911, found: 461.1907

**(5-Bromo-2,4-dimethoxyphenyl)(8-bromo-3-(2,4-dimethoxybenzoyl)-5,6-dimethoxy-4-(4-methoxyphenyl)-3,4-dihydronaphthalen-2-yl)methanone (3x).** Yellow solid; isolated yield 40% (93 mg).  $R_f$  0.50 (50% EtOAc/hexane); Mp 120-121 °C;  $^1\text{H}$  NMR (400 MHz,  $\text{CDCl}_3$ )  $\delta$  7.62-7.64 (m, 1H), 7.57 (s, 1H), 7.51 (s, 1H), 7.14 (d,  $J = 8.6$  Hz, 2H), 7.00 (s, 1H), 6.77 (d,  $J = 8.7$  Hz, 2H), 6.50-6.53 (m, 3H), 5.40 (s, 1H), 4.91 (s, 1H), 3.98 (s, 3H), 3.88 (s, 3H), 3.87 (s, 3H), 3.85 (s, 3H), 3.77 (s, 6H), 3.43 (s, 3H);  $^{13}\text{C}$  NMR (100 MHz,  $\text{CDCl}_3$ )  $\delta$  197.66, 193.33, 164.19, 160.15, 158.45, 158.30, 158.23, 154.85, 145.87, 140.26, 135.16, 135.03, 134.55, 134.29, 132.96, 128.54, 125.00, 122.31, 120.23, 119.90, 114.99, 113.61, 105.29,

101.86, 98.52, 96.60, 60.36, 56.35, 56.08, 55.91, 55.73, 55.50, 55.21, 50.46, 39.45; **HRMS** for  $C_{37}H_{34}Br_2O_9$ : calcd. (M+H)<sup>+</sup>: 781.0642, found: 781.0643

**(7-Chloro-1-(4-chlorophenyl)-1,2-dihydronaphthalene-2,3-diyl)bis(phenylmethanone)**

**(3y)**. Yellow solid; isolated yield 50% (72 mg).  $R_f$  0.50 (15% EtOAc/hexane); Mp 115-117 °C; <sup>1</sup>H NMR (400 MHz, CDCl<sub>3</sub>) δ 7.87-7.89 (m, 2H), 7.60-7.62 (m, 2H), 7.47-7.52 (m, 2H), 7.36-7.41 (m, 4H), 7.30 (s, 1H), 7.16-7.19 (m, 4H), 7.00-7.03 (m, 2H), 6.91 (br s, 1H), 5.13 (d,  $J$  = 3.9 Hz, 1H), 4.42 (d,  $J$  = 3.9 Hz, 1H); <sup>13</sup>C NMR (100 MHz, CDCl<sub>3</sub>) δ 198.24, 195.94, 140.50, 140.45, 138.24, 137.44, 136.54, 135.83, 134.70, 133.26, 132.21, 130.59, 130.13, 129.37, 129.24, 129.15, 129.01, 128.79, 128.73, 128.38, 128.14, 49.05, 46.19; **HRMS** for  $C_{30}H_{20}Cl_2O_2$ : calcd. (M+H)<sup>+</sup>: 483.0913, found: 483.0914

**(7-Fluoro-1-phenyl-1,2-dihydronaphthalene-2,3-diyl)bis(phenylmethanone) (3z)**. White

solid; isolated yield 54% (70 mg).  $R_f$  0.50 (10% EtOAc/hexane); Mp 90-92 °C; <sup>1</sup>H NMR (400 MHz, CDCl<sub>3</sub>) δ 7.91 (d,  $J$  = 7.6 Hz, 2H), 7.63 (d,  $J$  = 7.5 Hz, 2H), 7.48 (t,  $J$  = 7.5 Hz, 2H), 7.38 (t,  $J$  = 7.7 Hz, 4H), 7.33 (s, 1H), 7.13-7.23 (m, 4H), 7.09-7.11 (m, 2H), 6.85-6.90 (m, 1H), 6.66 (dd,  $J$  = 9.2 Hz, 2.4 Hz, 1H), 5.17 (d,  $J$  = 4.2 Hz, 1H), 4.45 (d,  $J$  = 4.1 Hz, 1H); <sup>13</sup>C NMR (100 MHz, CDCl<sub>3</sub>) δ 198.81, 196.13, 164.03 (d,  $J$  = 250.2 Hz), 142.07, 140.91, 139.83 (d,  $J$  = 7.9 Hz), 137.70, 136.02, 134.21 (d,  $J$  = 2.4 Hz), 133.08, 132.01, 131.24 (d,  $J$  = 8.6 Hz), 129.37, 128.97, 128.77, 128.68, 128.32, 128.01 (d,  $J$  = 3.1 Hz), 127.69, 127.40, 116.51 (d,  $J$  = 22.4 Hz), 114.70 (d,  $J$  = 21.8 Hz), 49.10, 47.22; **HRMS** for  $C_{30}H_{21}FO_2$ : calcd. (M+H)<sup>+</sup>: 433.1598, found: 433.1603

**(3-Benzoyl-7-fluoro-1-phenyl-1,2-dihydronaphthalen-2-yl)(thiophen-2-yl)methanone**

**(3za)**. Yellow gummy solid; isolated yield 58% (76 mg).  $R_f$  0.50 (15% EtOAc/hexane); <sup>1</sup>H NMR (400 MHz, CDCl<sub>3</sub>) δ 7.75 (d,  $J$  = 3.6 Hz, 1H), 7.62 (d,  $J$  = 7.3 Hz, 2H), 7.57 (d,  $J$  = 4.8 Hz, 1H), 7.46-7.49 (m, 1H), 7.35-7.39 (m, 2H), 7.31 (s, 1H), 7.10-7.23 (m, 6H), 7.05 (t,  $J$  = 4.6 Hz, 1H), 6.85-6.92 (m, 1H), 6.69 (dd,  $J$  = 9.2 Hz, 2.2 Hz, 1H), 4.95 (d,  $J$  = 4.2 Hz, 1H), 4.52 (d,  $J$  = 4.2 Hz, 1H); <sup>13</sup>C NMR (100 MHz, CDCl<sub>3</sub>) δ 196.03, 191.25, 164.10 (d,  $J$  = 250.8 Hz), 142.86, 142.10, 141.04, 139.89 (d,  $J$  = 7.9 Hz), 137.64, 134.28, 133.48, 132.79, 132.06, 131.26 (d,  $J$  = 8.7 Hz), 129.39, 128.98, 128.33, 127.98, 127.78, 127.44, 116.54 (d,  $J$  = 22.7 Hz), 114.69 (d,  $J$  = 21.7 Hz), 50.98, 47.78; **HRMS** for  $C_{28}H_{19}FO_2S$ : calcd. (M+H)<sup>+</sup>: 439.1163, found: 439.1161

**(3-Benzoyl-4-phenyl-3,4-dihydronaphthalen-2-yl)(thiophen-2-yl)methanone (3zb)**.

Yellow solid; isolated yield 55% (69 mg).  $R_f$  0.50 (10% EtOAc/hexane); Mp 111-113 °C; <sup>1</sup>H NMR (400 MHz, CDCl<sub>3</sub>) δ 7.88-7.90 (m, 2H), 7.68 (dd,  $J$  = 3.8 Hz, 1.1 Hz, 1H), 7.66 (s, 1H), 7.57 (dd,  $J$  = 5.0 Hz, 1.1 Hz, 1H), 7.44-7.48 (m, 1H), 7.34-7.38 (m, 2H), 7.30-7.32 (m,

1H), 7.15-7.23 (m, 4H), 7.06-7.11 (m, 4H), 6.93 (br d,  $J = 6.8$  Hz, 1H), 5.12 (d,  $J = 4.2$  Hz, 1H), 4.45 (d,  $J = 4.2$  Hz, 1H);  $^{13}\text{C}$  NMR (100 MHz,  $\text{CDCl}_3$ )  $\delta$  198.56, 187.30, 142.75, 142.71, 140.04, 136.89, 136.10, 134.82, 133.34, 133.28, 132.93, 131.69, 130.77, 129.45, 129.12, 128.80, 128.78, 128.60, 127.77, 127.73, 127.12, 50.03, 47.08; HRMS for  $\text{C}_{28}\text{H}_{20}\text{O}_2\text{S}$ : calcd. (M+H) $^+$ : 421.1257, found: 421.1257

**Ethyl 3-benzoyl-4-phenyl-3,4-dihydronaphthalene-2-carboxylate (3zc).** White solid; isolated yield 57% (65 mg).  $R_f$  0.50 (15% EtOAc/hexane); Mp 101-102 °C;  $^1\text{H}$  NMR (400 MHz,  $\text{CDCl}_3$ )  $\delta$  7.94-7.66 (m, 2H), 7.85 (s, 1H), 7.52-7.56 (m, 1H), 7.42-7.46 (m, 2H), 7.34-7.36 (m, 1H), 7.14-7.23 (m, 5H), 7.05-7.08 (m, 2H), 6.88 (d,  $J = 7.3$  Hz, 1H), 4.98 (d,  $J = 3.0$  Hz, 1H), 4.35 (d,  $J = 3.0$  Hz, 1H), 4.10 (q,  $J = 7.1$  Hz, 2H), 1.15 (t,  $J = 7.1$  Hz, 3H);  $^{13}\text{C}$  NMR (100 MHz,  $\text{CDCl}_3$ )  $\delta$  198.28, 166.58, 143.51, 138.98, 136.23, 135.84, 133.06, 131.57, 130.46, 129.33, 129.12, 128.83, 128.82, 128.73, 127.69, 127.54, 127.05, 126.11, 60.90, 49.18, 46.93, 14.08; HRMS for  $\text{C}_{26}\text{H}_{22}\text{O}_3$ : calcd. (M+H) $^+$ : 383.1642, found: 383.1644

**(6,7-Dimethoxy-1-(4-methoxyphenyl)-1,2-dihydronaphthalene-2,3-diyl)bis((2,4-dimethoxy phenyl)methanone) (3zd).** Yellow solid;  $R_f$  0.50 (50% EtOAc/hexane); Mp 185-187 °C;  $^1\text{H}$  NMR (400 MHz,  $\text{CDCl}_3$ )  $\delta$  7.65 (d,  $J = 8.6$  Hz, 1H), 7.21 (d,  $J = 8.4$  Hz, 1H), 7.16 (s, 1H), 7.06 (d,  $J = 8.3$  Hz, 2H), 6.71 (d,  $J = 8.3$  Hz, 2H), 6.48 (s, 1H), 6.42-6.46 (m, 4H), 5.26 (s, 1H), 4.31 (s, 1H), 3.79 (s, 6H), 3.76 (s, 3H), 3.74 (s, 3H), 3.70 (2 s merged, 6H), 3.65 (s, 3H);  $^{13}\text{C}$  NMR (100 MHz,  $\text{CDCl}_3$ )  $\delta$  197.67, 195.04, 164.23, 162.36, 160.35, 158.94, 158.19, 150.59, 147.86, 141.75, 136.84, 134.59, 133.59, 131.62, 131.37, 128.42, 124.86, 122.06, 120.07, 113.65, 112.10, 105.35, 104.15, 98.88, 98.52, 55.91, 55.88, 55.71, 55.68, 55.51, 55.45, 55.24, 51.58, 45.50; HRMS for  $\text{C}_{37}\text{H}_{36}\text{O}_9$ : calcd. (M+H) $^+$ : 625.2432, found: 625.2431

**(7,8-Dimethoxy-1-(4-methoxyphenyl)-1,2-dihydronaphthalene-2,3-diyl)bis((2,4-dimethoxy phenyl)methanone) (3ze).** White solid;  $R_f$  0.50 (50% EtOAc/hexane); Mp 125-127 °C;  $^1\text{H}$  NMR (400 MHz,  $\text{CDCl}_3$ )  $\delta$  7.56 (d,  $J = 8.9$  Hz, 1H), 7.02-7.09 (m, 4H), 6.71 (s, 1H), 6.65 (d,  $J = 8.5$  Hz, 2H), 6.51 (s, 1H), 6.39-6.48 (m, 4H), 4.93 (s, 1H), 4.58 (s, 1H), 3.81 (s, 9H), 3.77 (s, 3H), 3.73 (s, 3H), 3.67 (s, 3H), 3.61 (s, 3H);  $^{13}\text{C}$  NMR (100 MHz,  $\text{CDCl}_3$ )  $\delta$  199.01, 195.34, 164.33, 162.31, 159.76, 158.90, 158.24, 150.50, 148.17, 140.10, 137.10, 135.09, 133.26, 130.97, 128.63, 127.78, 126.34, 122.33, 120.14, 113.54, 112.78, 111.80, 105.56, 104.13, 98.91, 98.44, 57.55, 55.90, 55.84, 55.66, 55.57, 55.44, 55.14, 39.58; HRMS for  $\text{C}_{37}\text{H}_{36}\text{O}_9$ : calcd. (M+H) $^+$ : 625.2432, found: 625.2431

**(3-Benzoyl-1-(p-tolyl)naphthalen-2-yl)(4-methoxyphenyl)methanone (4a).** Yellow solid; isolated yield 56% (25 mg).  $R_f$  0.50 (20% EtOAc/hexane); Mp 138-140 °C;  $^1\text{H}$  NMR (400

MHz, CDCl<sub>3</sub>) δ 8.11 (s, 1H), 7.93 (d, *J* = 8.4 Hz, 1H), 7.85-7.88 (m, 2H), 7.68 (d, *J* = 8.4 Hz, 1H), 7.51-7.61 (m, 5H), 7.43-7.47 (m, 2H), 7.04, 7.11 (ABq, *J* = 7.9 Hz, 4H), 6.67-6.71 (m, 2H), 3.76 (s, 3H), 2.28 (s, 3H); <sup>13</sup>C NMR (100 MHz, CDCl<sub>3</sub>) δ 196.77, 196.25, 162.90, 138.98, 137.55, 137.46, 137.26, 135.04, 133.78, 133.44, 132.88, 131.97, 131.54, 131.16, 130.68, 130.50, 129.12, 128.69, 128.54, 128.30, 127.40, 126.99, 113.14, 55.33, 21.22; HRMS for C<sub>32</sub>H<sub>24</sub>O<sub>3</sub>: calcd. (M+H)<sup>+</sup>: 457.1798, found: 457.1796

**(3-Benzoyl-1-(4-methoxyphenyl)naphthalen-2-yl)(3-methoxyphenyl)methanone (4b).**

Yellow solid; isolated yield 60% (28 mg). *R<sub>f</sub>* 0.50 (25% EtOAc/hexane); Mp 169-171 °C; <sup>1</sup>H NMR (400 MHz, CDCl<sub>3</sub>) δ 8.06 (s, 1H), 7.87 (d, *J* = 7.5 Hz, 1H), 7.80-7.82 (m, 2H), 7.63 (d, *J* = 8.3 Hz, 1H), 7.46-7.55 (m, 3H), 7.38-7.42 (m, 2H), 7.00-7.07 (m, 5H), 6.81-6.84 (m, 1H), 6.68-6.72 (m, 2H), 3.69 (s, 3H), 3.64 (s, 3H); <sup>13</sup>C NMR (100 MHz, CDCl<sub>3</sub>) δ 198.17, 196.07, 159.21, 159.03, 140.01, 138.95, 137.72, 137.40, 134.96, 133.98, 132.88, 132.10, 132.04, 131.45, 130.48, 129.20, 128.85, 128.80, 128.48, 128.33, 127.51, 126.93, 122.50, 119.21, 113.37, 112.65, 55.30, 55.20; HRMS for C<sub>32</sub>H<sub>24</sub>O<sub>4</sub>: calcd. (M+H)<sup>+</sup>: 473.1747, found: 473.1752

**(3-Benzoyl-1-(4-methoxyphenyl)naphthalen-2-yl)(4-methoxyphenyl)methanone (4c).**

White solid; isolated yield 30% (14 mg). *R<sub>f</sub>* 0.50 (15% EtOAc/hexane); Mp 194-195 °C; <sup>1</sup>H NMR (400 MHz, CDCl<sub>3</sub>) δ 8.04 (s, 1H), 7.86 (d, *J* = 7.9 Hz, 1H), 7.80 (d, *J* = 7.3 Hz, 2H), 7.63 (d, *J* = 8.2 Hz, 1H), 7.46-7.54 (m, 5H), 7.39 (t, *J* = 7.7 Hz, 2H), 7.07 (d, *J* = 8.2 Hz, 2H), 6.70 (d, *J* = 8.5 Hz, 2H), 6.62 (d, *J* = 8.8 Hz, 2H), 3.69, 3.70 (2 s, 6H); <sup>13</sup>C NMR (100 MHz, CDCl<sub>3</sub>) δ 196.91, 196.25, 162.89, 158.97, 138.56, 137.79, 137.44, 135.08, 133.91, 132.89, 132.01, 131.91, 131.51, 131.14, 130.52, 129.15, 128.70, 128.63, 128.30, 127.38, 126.90, 113.35, 113.18, 55.32, 55.19; HRMS for C<sub>32</sub>H<sub>24</sub>O<sub>4</sub>: calcd. (M+H)<sup>+</sup>: 473.1747, found: 473.1747

**(3-(3-Methoxybenzoyl)-4-(4-methoxyphenyl)-6-methylnaphthalen-2-yl)(p-**

**tolyl)methanone (4d).** White solid; isolated yield 50% (25 mg). *R<sub>f</sub>* 0.50 (25% EtOAc/hexane); Mp 130-132 °C; <sup>1</sup>H NMR (400 MHz, CDCl<sub>3</sub>) δ 8.02 (s, 1H), 7.77 (d, *J* = 8.7 Hz, 1H), 7.71 (d, *J* = 7.8 Hz, 2H), 7.37 (br d, *J* = 5.2 Hz, 2H), 7.19 (d merged with CDCl<sub>3</sub> peak, *J* = 7.6 Hz, 2H), 7.00-7.06 (m, 5H), 6.82 (d, *J* = 6.8 Hz, 1H), 6.70 (d, *J* = 8.4 Hz, 2H), 3.71 (s, 3H), 3.64 (s, 3H), 2.37 (s, 6H); <sup>13</sup>C NMR (100 MHz, CDCl<sub>3</sub>) δ 198.33, 195.75, 159.18, 158.91, 143.59, 140.13, 139.09, 138.18, 137.91, 134.90, 134.29, 134.12, 132.11, 131.23, 130.64, 130.23, 129.68, 129.04, 128.99, 128.74, 128.68, 125.84, 122.50, 119.16, 113.32, 112.55, 55.28, 55.18, 22.16, 21.70; HRMS for C<sub>34</sub>H<sub>28</sub>O<sub>4</sub>: calcd. (M+H)<sup>+</sup>: 501.2060, found: 501.2067

**(3-(4-Methoxybenzoyl)-6-methyl-4-(4-(methylthio)phenyl)naphthalen-2-yl)(p-tolyl) methanone (4e).** White solid; isolated yield 26% (13 mg).  $R_f$  0.50 (20% EtOAc/hexane); Mp 205-207 °C;  $^1\text{H NMR}$  (400 MHz,  $\text{CDCl}_3$ )  $\delta$  8.01 (s, 1H), 7.76 (d,  $J = 8.3$  Hz, 1H), 7.69 (d,  $J = 8.2$  Hz, 2H), 7.45-7.48 (m, 2H), 7.35-7.37 (m, 1H), 7.33 (br s, 1H), 7.18 (d,  $J = 7.9$  Hz, 2H), 7.05 (s, 4H), 6.60-6.64 (m, 2H), 3.70 (s, 3H), 2.36, 2.37, 2.38 (3s merged, 9H);  $^{13}\text{C NMR}$  (100 MHz,  $\text{CDCl}_3$ )  $\delta$  196.85, 195.83, 162.88, 143.65, 139.09, 137.86, 137.50, 134.91, 134.34, 133.77, 133.32, 132.01, 131.47, 131.23, 131.12, 130.66, 130.18, 129.66, 129.02, 128.98, 125.69, 113.17, 55.33, 22.16, 21.71, 15.56; **HRMS** for  $\text{C}_{34}\text{H}_{28}\text{O}_3\text{S}$ : calcd. (M+H) $^+$ : 517.1832, found: 517.1829

**(6,7-Dimethoxy-1-(4-methoxyphenyl)naphthalene-2,3-diyl)bis((2,4-dimethoxyphenyl) methanone) (4f).** White solid; isolated yield 14% (9 mg).  $R_f$  0.50 (60% EtOAc/hexane); Mp 138-140 °C;  $^1\text{H NMR}$  (500 MHz,  $\text{CDCl}_3$ )  $\delta$  7.80 (s, 1H), 7.36 (d,  $J = 8.7$  Hz, 1H), 7.32 (d,  $J = 8.1$  Hz, 1H), 7.09 (s, 1H), 7.04 (d,  $J = 7.7$  Hz, 2H), 6.80 (s, 1H), 6.70 (d,  $J = 7.7$  Hz, 2H), 6.38-6.40 (br m, 2H), 6.22 (d,  $J = 8.4$  Hz, 1H), 6.13 (s, 1H), 3.92 (s, 3H), 3.78 (s, 3H), 3.70 (s, 6H), 3.67 (s, 3H), 3.63 (s, 3H), 3.42 (s, 3H);  $^{13}\text{C NMR}$  (100 MHz,  $\text{CDCl}_3$ )  $\delta$  195.07, 194.53, 164.02, 163.57, 160.64, 160.35, 158.57, 150.99, 149.91, 139.07, 135.42, 135.11, 133.69, 133.40, 131.59, 130.30, 129.83, 129.33, 127.88, 122.37, 121.86, 113.22, 107.33, 105.63, 104.47, 104.37, 98.79, 98.06, 55.95, 55.80, 55.72, 55.48, 55.42, 55.35, 55.15; **HRMS** for  $\text{C}_{37}\text{H}_{34}\text{O}_9$ : calcd. (M+H) $^+$ : 623.2276, found: 623.2270

**(7,8-Dimethoxy-1-(4-methoxyphenyl)naphthalene-2,3-diyl)bis((2,4-dimethoxyphenyl) methanone) (4g).** White solid; isolated yield 13% (8 mg).  $R_f$  0.50 (60% EtOAc/hexane); Mp 147-149 °C;  $^1\text{H NMR}$  (400 MHz,  $\text{CDCl}_3$ )  $\delta$  7.86 (s, 1H), 7.09-7.19 (m, 4H), 6.82 (d,  $J = 7.8$  Hz, 2H), 6.37 (d,  $J = 8.3$  Hz, 2H), 6.16-6.19 (m, 1H), 6.10-6.13 (m, 1H), 6.07 (br s, 2H), 3.95 (s, 3H), 3.80 (s, 3H), 3.68 (s, 3H), 3.66 (s, 3H), 3.55 (s, 3H), 3.48 (s, 3H), 3.41 (s, 3H);  $^{13}\text{C NMR}$  (100 MHz,  $\text{CDCl}_3$ )  $\delta$  197.17, 196.70, 164.38, 163.87, 160.76, 160.02, 158.19, 151.14, 149.81, 139.07, 138.43, 133.75, 133.46, 132.99, 131.37, 130.78, 127.79, 127.38, 127.02, 122.29, 122.23, 112.61, 107.03, 104.40, 104.15, 104.09, 98.22, 98.11, 55.96, 55.91, 55.58, 55.40, 55.11; **HRMS** for  $\text{C}_{37}\text{H}_{34}\text{O}_9$ : calcd. (M+H) $^+$ : 623.2276, found: 623.2274

### 3. Crystallographic Data

#### 3.1 Crystallographic data for **31**

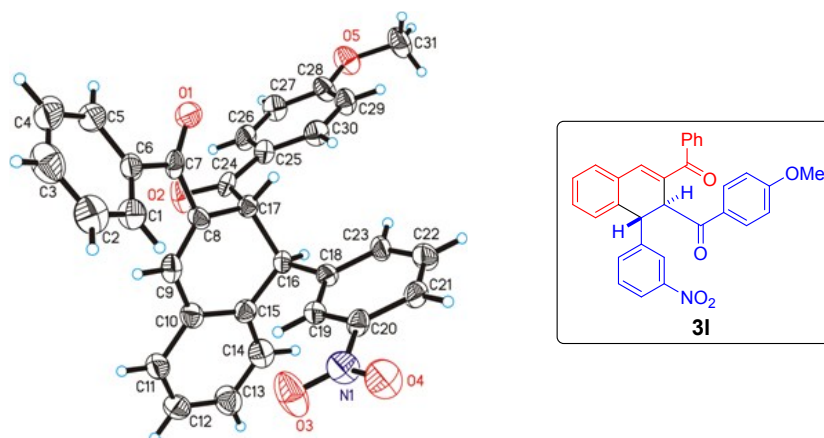

**Figure 1.** ORTEP diagram drawn with 30% ellipsoid probability for non-H atoms of the crystal structure of compound **31** determined at 293 K.

**Crystallization:** Crystals of compound **31** were grown from the solvent DCM:EtOH (1:3) by slow evaporation method.

**Table 1.** Crystal data and structure refinement details for **31**

| Compound                                                                 | <b>31</b>                                        |
|--------------------------------------------------------------------------|--------------------------------------------------|
| Empirical formula                                                        | C <sub>31</sub> H <sub>23</sub> N O <sub>5</sub> |
| Formula weight                                                           | 489.50                                           |
| Crystal System                                                           | Monoclinic                                       |
| Space group                                                              | <i>P</i> 2 <sub>1</sub> / <i>c</i>               |
| <i>a</i> (Å)                                                             | 13.541(8)                                        |
| <i>b</i> (Å)                                                             | 9.928(6)                                         |
| <i>c</i> (Å)                                                             | 20.222(15)                                       |
| $\alpha$ (°)                                                             | 90.00                                            |
| $\beta$ (°)                                                              | 90.670(14)                                       |
| $\gamma$ (°)                                                             | 90.00                                            |
| <i>V</i> (Å <sup>3</sup> )                                               | 2718(3)                                          |
| <i>Z</i>                                                                 | 4                                                |
| <i>D</i> <sub>c</sub> (g/cm <sup>3</sup> )                               | 1.196                                            |
| <i>F</i> <sub>000</sub>                                                  | 1024                                             |
| $\mu$ (mm <sup>-1</sup> )                                                | 0.081                                            |
| $\theta_{\max}$ (°)                                                      | 25.40                                            |
| Total reflections                                                        | 13071                                            |
| Unique reflections                                                       | 4683                                             |
| Reflections [ <i>I</i> > 2 $\sigma$ ( <i>I</i> )]                        | 1282                                             |
| Parameters                                                               | 335                                              |
| <i>R</i> <sub>int</sub>                                                  | 0.1222                                           |
| Goodness-of-fit                                                          | 0.859                                            |
| <i>R</i> [ <i>F</i> <sup>2</sup> > 2 $\sigma$ ( <i>F</i> <sup>2</sup> )] | 0.0936                                           |
| <i>wR</i> ( <i>F</i> <sup>2</sup> , all data)                            | 0.2884                                           |
| CCDC No.                                                                 | 1816363                                          |

### 3.2 Crystallographic data for 3x

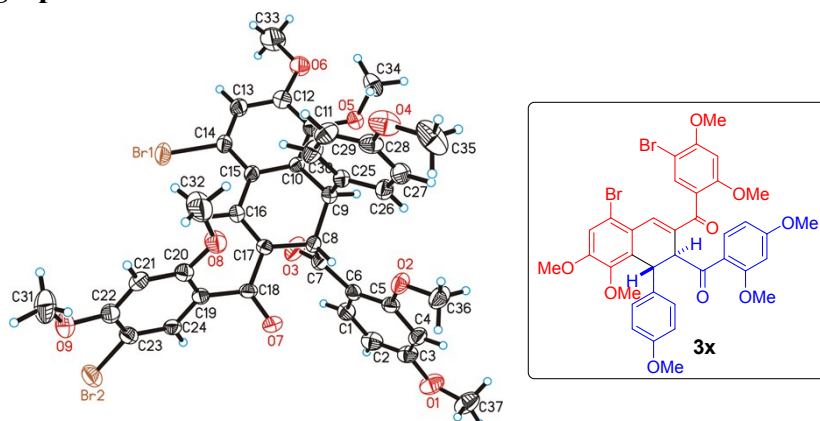

**Figure 2** ORTEP diagram drawn with 30% ellipsoid probability for non-H atoms of the crystal structure of compound **3x** determined at 293 K.

**Crystallization:** Crystals of compound **3x** were grown from the solvent DCM:EtOH (1:3) by slow evaporation method.

**Table 2** Crystal data and structure refinement details for **3x**

| Compound                                                        | <b>3x</b>                                                       |
|-----------------------------------------------------------------|-----------------------------------------------------------------|
| Empirical formula                                               | C <sub>38</sub> H <sub>34</sub> Br <sub>2</sub> O <sub>10</sub> |
| Formula weight                                                  | 810.47                                                          |
| Crystal System                                                  | Monoclinic                                                      |
| Space group                                                     | <i>P</i> 2 <sub>1</sub> / <i>c</i>                              |
| <i>a</i> (Å)                                                    | 17.651(4)                                                       |
| <i>b</i> (Å)                                                    | 11.598(3)                                                       |
| <i>c</i> (Å)                                                    | 18.625(5)                                                       |
| <i>α</i> (°)                                                    | 90.00                                                           |
| <i>β</i> (°)                                                    | 98.778(5)                                                       |
| <i>γ</i> (°)                                                    | 90.00                                                           |
| <i>V</i> (Å <sup>3</sup> )                                      | 3768.2(16)                                                      |
| <i>Z</i>                                                        | 4                                                               |
| <i>D<sub>c</sub></i> (g/cm <sup>3</sup> )                       | 1.429                                                           |
| <i>F</i> <sub>000</sub>                                         | 1648                                                            |
| <i>μ</i> (mm <sup>-1</sup> )                                    | 2.206                                                           |
| <i>θ</i> <sub>max</sub> (°)                                     | 25.38                                                           |
| Total reflections                                               | 23722                                                           |
| Unique reflections                                              | 6762                                                            |
| Reflections [ <i>I</i> > 2σ( <i>I</i> )]                        | 3424                                                            |
| Parameters                                                      | 458                                                             |
| <i>R</i> <sub>int</sub>                                         | 0.0752                                                          |
| Goodness-of-fit                                                 | 0.999                                                           |
| <i>R</i> [ <i>F</i> <sup>2</sup> > 2σ( <i>F</i> <sup>2</sup> )] | 0.0647                                                          |
| <i>wR</i> ( <i>F</i> <sup>2</sup> , all data)                   | 0.1871                                                          |
| CCDC No.                                                        | 1816362                                                         |

#### 4. Experimental HPLC Chromatogram of the Product Mixture of Reaction between 1s & 2h

Data File C:\CHEM32\1\DATA\MANISHA-28-02-2018-1 2018-02-28 12-40-34\069-0101.D  
 Sample Name: NAM-1

```

=====
Acq. Operator   : Dr. Anil Kumar K.S.           Seq. Line :    1
Acq. Instrument : Instrument 1                   Location  : Vial 69
Injection Date  : 2/28/2018 12:42:25 PM        Inj       :    1
                                                Inj Volume: 5.000 µl
Acq. Method     : C:\CHEM32\1\DATA\MANISHA-28-02-2018-1 2018-02-28 12-40-34\ACN-METH-WATER-35
                                                -35-30.M
Last changed    : 2/28/2018 11:52:20 AM by Dr. Anil Kumar K.S.
Analysis Method : C:\CHEM32\1\METHODS\ACN-METH-WATER-35-35-30.M
Last changed    : 2/28/2018 11:52:20 AM by Dr. Anil Kumar K.S.
Method Info     : OSDD
  
```

Additional Info : Peak(s) manually integrated

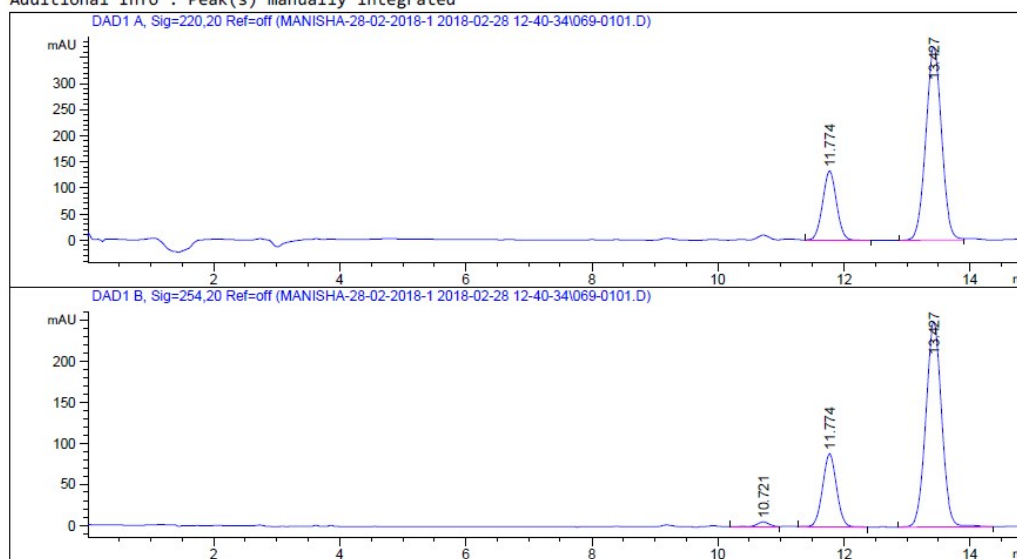

#### Area Percent Report

```

Sorted By      : Signal
Multiplier     : 1.0000
Dilution       : 1.0000
Use Multiplier & Dilution Factor with ISTDs
  
```

Signal 1: DAD1 A, Sig=220,20 Ref=off

| Peak # | RetTime [min] | Type | Width [min] | Area [mAU*s] | Height [mAU] | Area %  |
|--------|---------------|------|-------------|--------------|--------------|---------|
| 1      | 11.774        | VB   | 0.2420      | 2053.78418   | 133.10472    | 24.1867 |
| 2      | 13.427        | BV   | 0.2710      | 6437.61035   | 370.04031    | 75.8133 |

Totals : 8491.39453 503.14503

Signal 2: DAD1 B, Sig=254,20 Ref=off

| Peak # | RetTime [min] | Type | Width [min] | Area [mAU*s] | Height [mAU] | Area %  |
|--------|---------------|------|-------------|--------------|--------------|---------|
| 1      | 10.721        | BV   | 0.2118      | 79.16134     | 5.77861      | 1.3644  |
| 2      | 11.774        | BB   | 0.2407      | 1362.77673   | 88.97102     | 23.4882 |
| 3      | 13.427        | BB   | 0.2718      | 4360.01416   | 249.59172    | 75.1474 |

Totals : 5801.95223 344.34136

\*\*\* End of Report \*\*\*



## 5. References

- (1) For **1a**: (a) P. Ahmad, H. Woo, K. Jun, A. A. Kadi, H. A. Abdel-Aziz, K. Kwon and A. F. M. M. Rahman, *Bioorg. Med. Chem.*, 2016, **24**, 1898-1908; For **1b**, **1d**, **1g**: (b) I. Kazi, S. Guha and G. Sekar, *Org. Lett.*, 2017, **19**, 1244-1247; For **1c**, **1i**, **1k**: (c) L. Zhang, A. Wang, W. Wang, Y. Huang, X. Liu, S. Miao, J. Liu and T. Zhang, *ACS Catal.*, 2015, **5**, 6563-6572; For **1e**: (d) S. M. Stevenson, R. F. Higgins, M. P. Shores and E. M. Ferreira, *Chem. Sci.*, 2017, **8**, 654-660; For **1f**: (e) M. D. Bowman, M. M. Jacobson and H. E. Blackwell, *Org. Lett.*, 2016, **8**, 1645-1648; For **1h**: (f) B. Umesha and Y. B. Basavaraju, *Russ. J. Bioorg. Chem.*, 2014, **40**, 467-476; For **1j**, **1r**: (g) C. Chan, Y. Tsai and M. Y. Chang, *Tetrahedron*, 2017, **73**, 3368-3376; For **1l**: (h) P. Gao, K. Zhang, M. Yang, S. Xu, H. Sun, J. Zhang, Z. Gao, W. Zhang and L. Xu, *Chem. Commun.*, 2018, **54**, 5074-5077; For **1m**: (i) M. Li, V. Carreras, A. Jalba and T. Ollevier, *Org. Lett.*, 2018, **20**, 995-998; For **1n**: (j) B. Liu, Y. Bao, F. Du, H. Wang, J. Tian and R. Bai, *Chem. Commun.*, 2011, **47**, 1731-1733; For **1o**: (k) A. Ueda, T. Umeno, M. Doi, K. Akagawa, K. Kudo and M. Tanaka, *J. Org. Chem.*, 2016, **81**, 6343-6356; For **1p**: (l) D. Wang, Y. Zhang, A. Harris, L. N. S. Gautam, Y. Chen and X. Shi, *Adv. Synth. Catal.*, 2011, **353**, 2584-2588; For **1q**: (m) P. Gao, K. Zhang, M. Yang, S. Xu, H. Sun, J. Zhang, Z. Gao, W. Zhang and L. Xu, *Chem. Commun.*, 2018, **54**, 5074-5077; For **1s**: (n) A. Bianco, C. Cavarischia and M. Guis, *Eur. J. Org. Chem.*, 2004, 2894-2898.
- (2) S. Paria and O. Reiser, *Adv. Synth. Catal.*, 2014, **356**, 557-562.

## 6. Copies of $^1\text{H}$ and $^{13}\text{C}$ NMR Spectra

NRMP-604

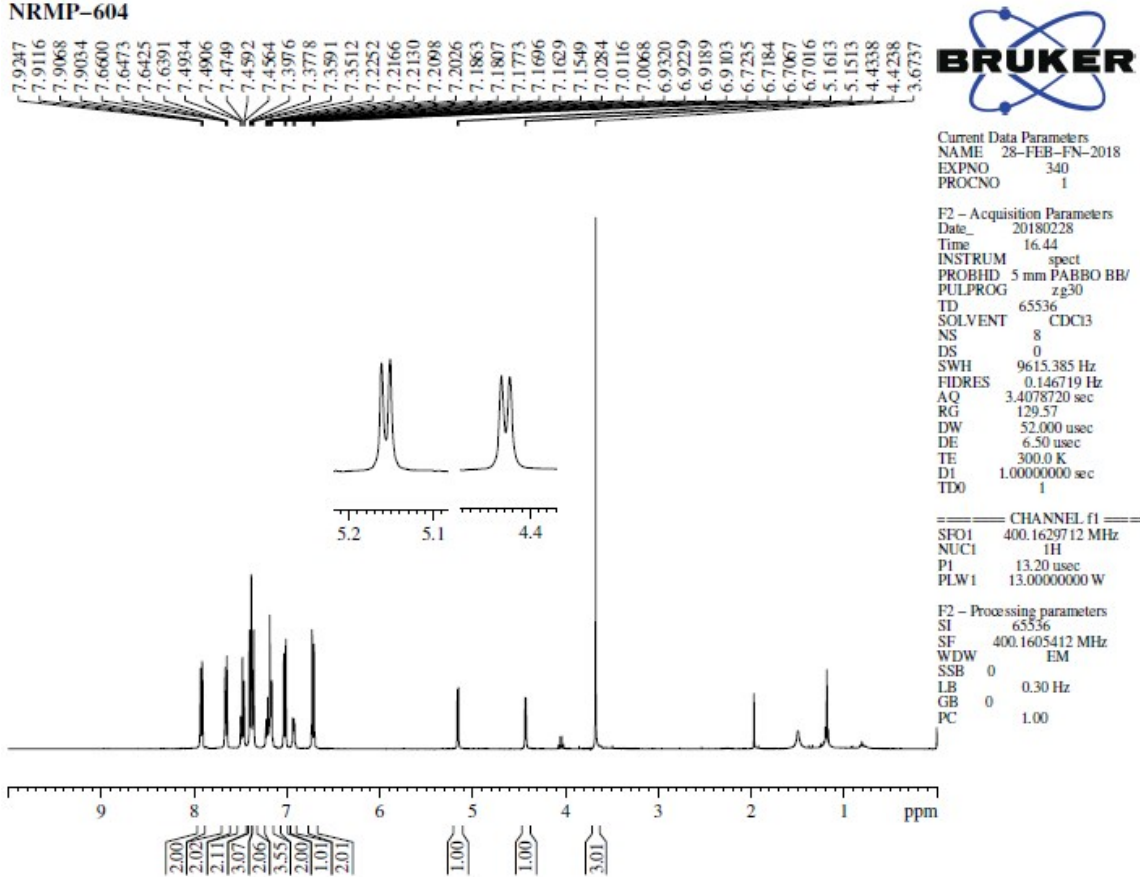

Figure 1:  $^1\text{H}$  NMR spectrum of 3a

NRMP-604

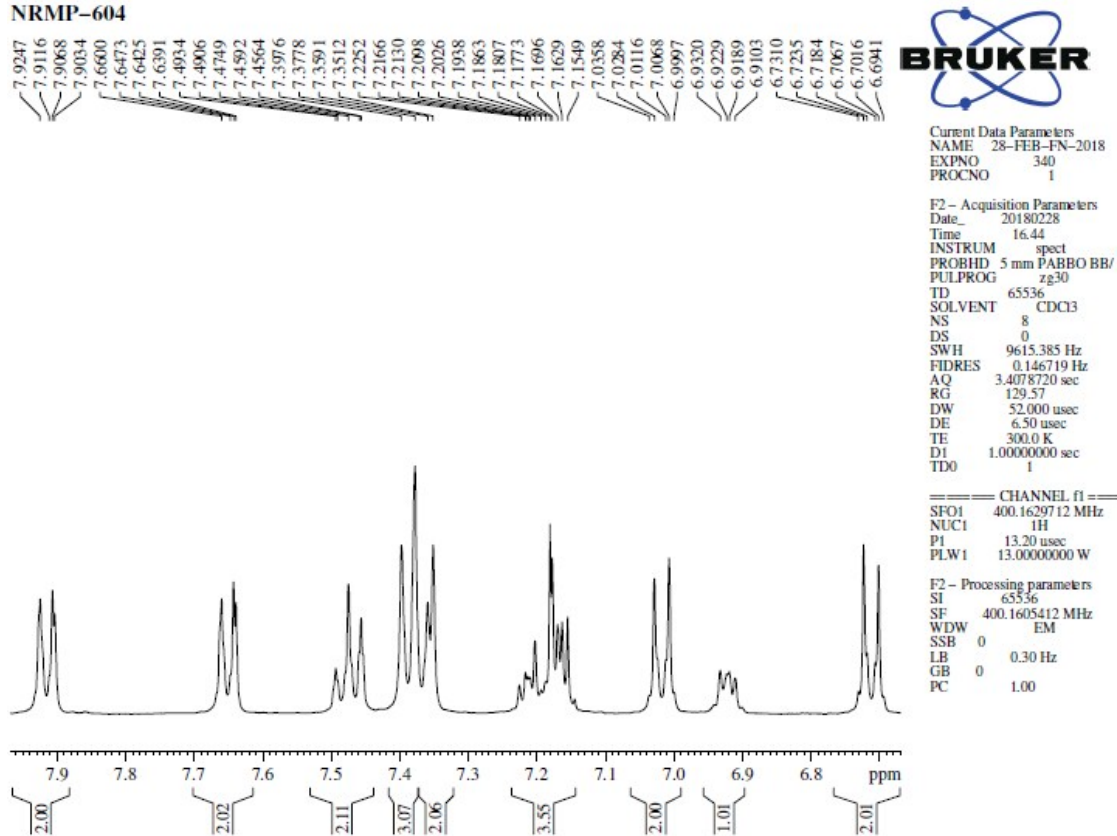

Figure 2:  $^1\text{H}$  NMR spectrum of 3a (expansion)

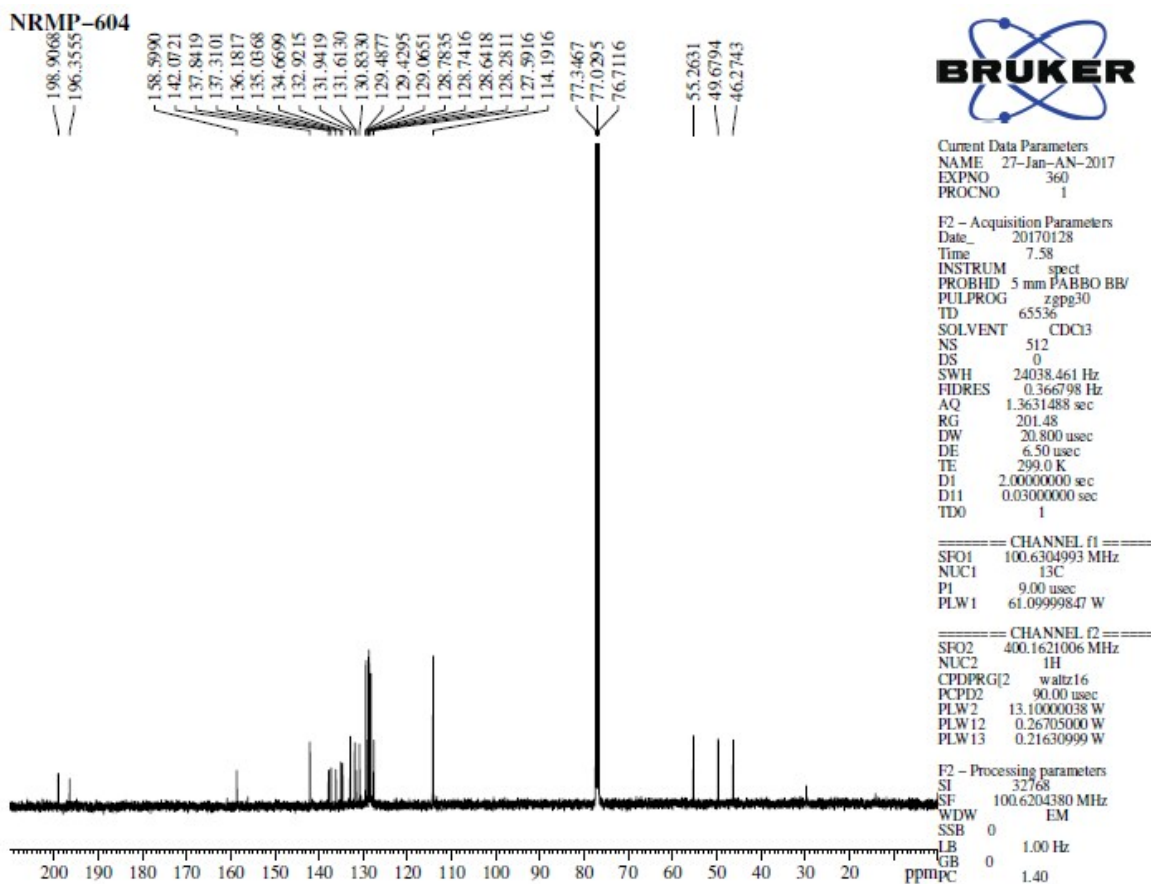

Figure 3:  $^{13}\text{C}$  NMR spectrum of 3a

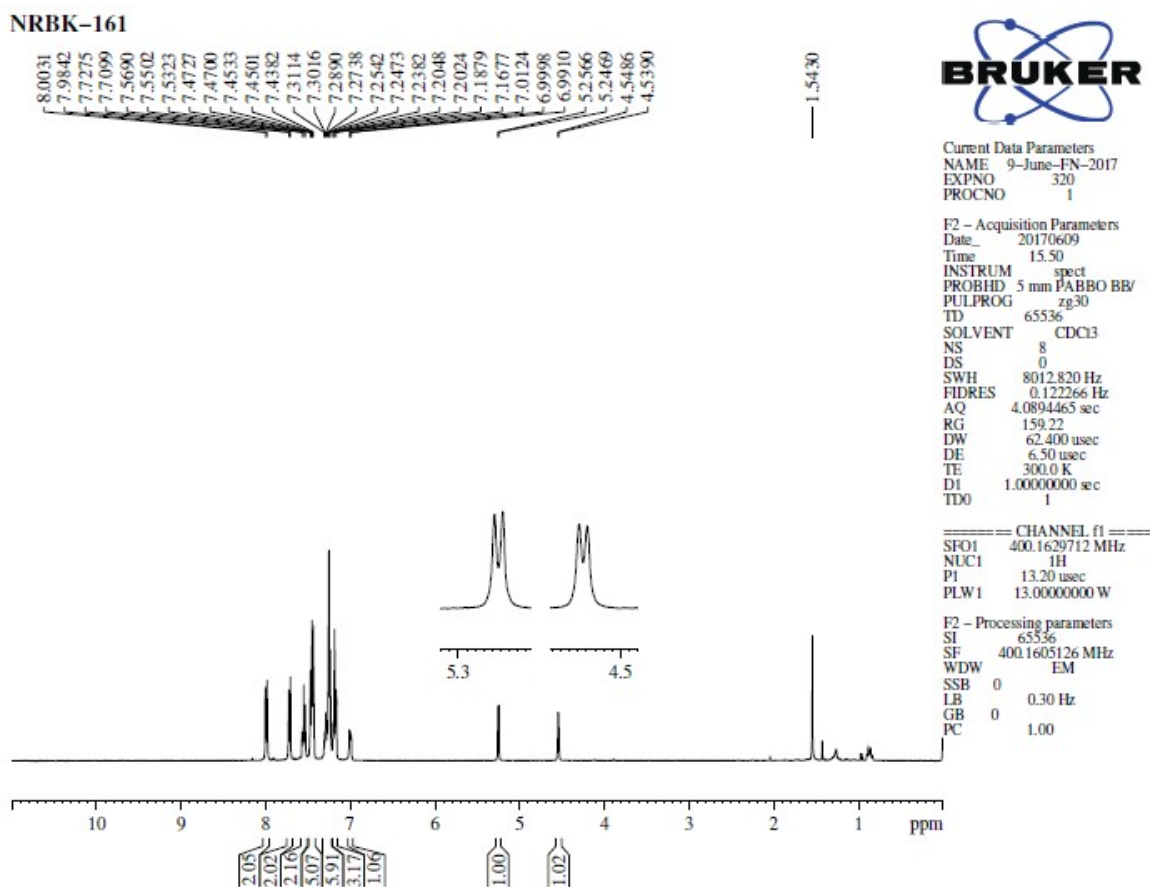

Figure 4:  $^1\text{H}$  NMR spectrum of 3b

NRBK-161

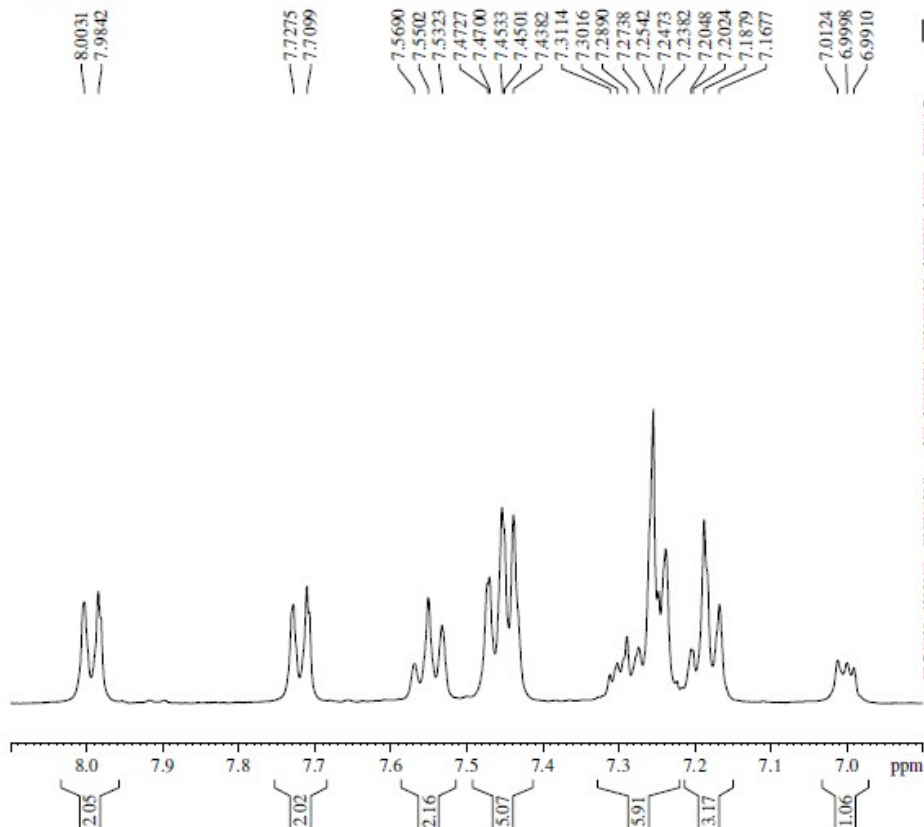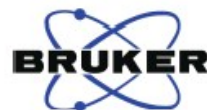

Current Data Parameters  
 NAME 9-June-FN-2017  
 EXPNO 320  
 PROCNO 1

F2 - Acquisition Parameters  
 Date\_ 20170609  
 Time 15.50  
 INSTRUM spect  
 PROBHD 5 mm PABBO BB  
 PULPROG zg30  
 TD 65536  
 SOLVENT CDCl3  
 NS 8  
 DS 0  
 SWH 8012.820 Hz  
 FIDRES 0.122266 Hz  
 AQ 4.0894465 sec  
 RG 159.22  
 DW 62.400 usec  
 DE 6.50 usec  
 TE 300.0 K  
 D1 1.0000000 sec  
 TD0 1

==== CHANNEL f1 ====  
 SFO1 400.1629712 MHz  
 NUC1 1H  
 P1 13.20 usec  
 PLW1 13.00000000 W

F2 - Processing parameters  
 SI 65536  
 SF 400.1605126 MHz  
 WDW EM  
 SSB 0  
 LB 0.30 Hz  
 GB 0  
 PC 1.00

Figure 5: <sup>1</sup>H NMR spectrum of 3b (expansion)

NRBK-161

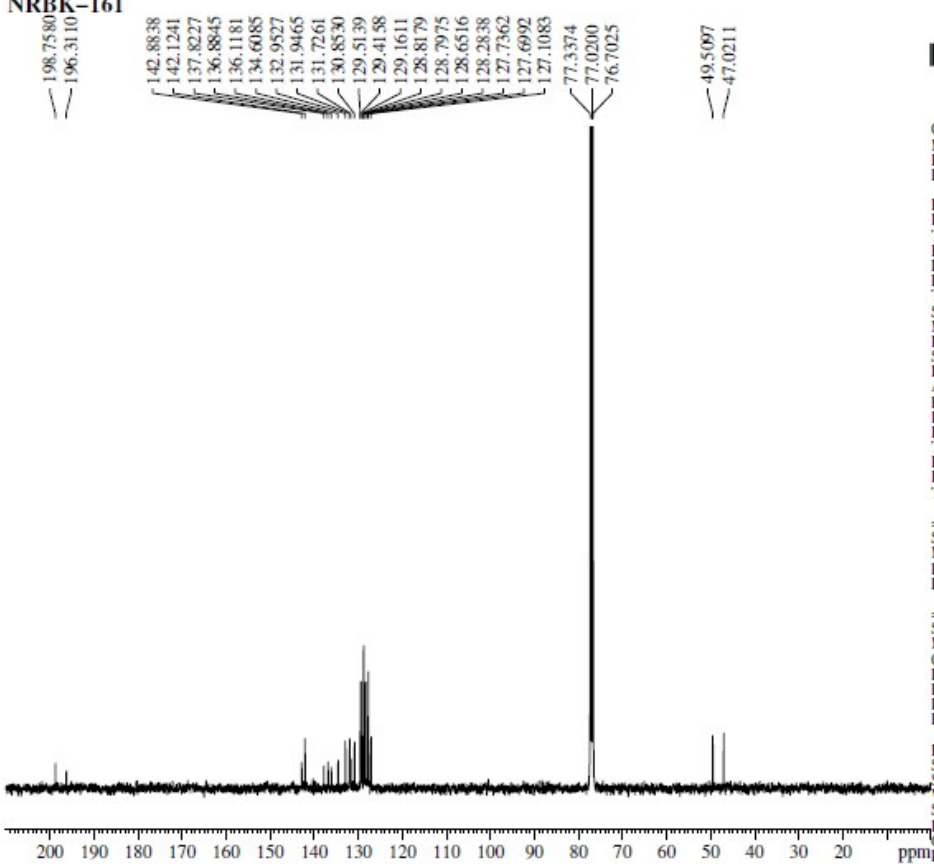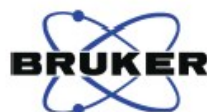

Current Data Parameters  
 NAME 12-Jun-FN-2017  
 EXPNO 320  
 PROCNO 1

F2 - Acquisition Parameters  
 Date\_ 20170612  
 Time 18.51  
 INSTRUM spect  
 PROBHD 5 mm PABBO BB  
 PULPROG zgpg30  
 TD 65536  
 SOLVENT CDCl3  
 NS 512  
 DS 0  
 SWH 24038.461 Hz  
 FIDRES 0.366798 Hz  
 AQ 1.3631488 sec  
 RG 201.48  
 DW 20.800 usec  
 DE 6.50 usec  
 TE 300.0 K  
 D1 2.0000000 sec  
 D11 0.03000000 sec  
 TD0 1

==== CHANNEL f1 ====  
 SFO1 100.6304993 MHz  
 NUC1 13C  
 P1 9.90 usec  
 PLW1 53.00000000 W

==== CHANNEL f2 ====  
 SFO2 400.1621006 MHz  
 NUC2 1H  
 CPDPRG12 waltz16  
 PCPD2 90.00 usec  
 PLW2 13.00000000 W  
 PLW12 0.27963999 W  
 PLW13 0.22651000 W

F2 - Processing parameters  
 SI 32768  
 SF 100.6204380 MHz  
 WDW EM  
 SSB 0  
 LB 3.00 Hz  
 GB 0  
 PC 1.40

Figure 6: <sup>13</sup>C NMR spectrum of 3b

NRBK-113

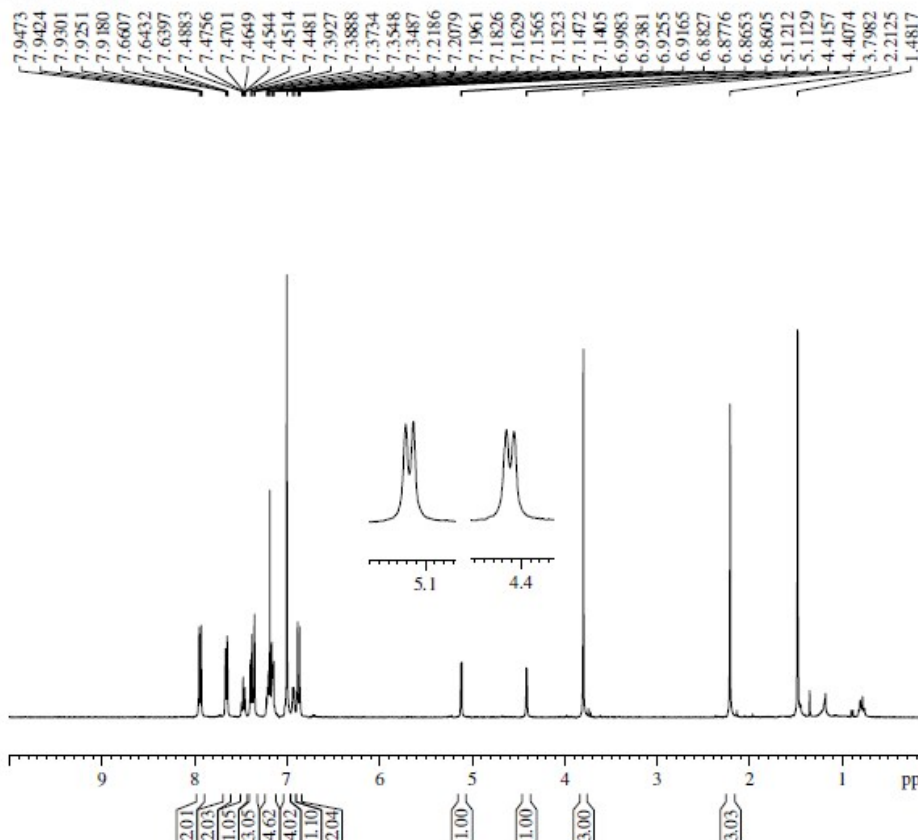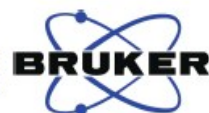

Current Data Parameters  
NAME 24-July-AN-2017  
EXPNO 340  
PROCNO 1

F2 - Acquisition Parameters  
Date\_ 20170725  
Time 7.25  
INSTRUM spect  
PROBHD 5 mm PABBO BB/  
PULPROG zg30  
TD 65536  
SOLVENT CDCl3  
NS 8  
DS 2  
SWH 8012.820 Hz  
FIDRES 0.122266 Hz  
AQ 4.0894465 sec  
RG 159.22  
DW 62.400 usec  
DE 6.50 usec  
TE 300.0 K  
D1 1.00000000 sec  
TD0 1

==== CHANNEL f1 ====  
SFO1 400.1629712 MHz  
NUC1 1H  
P1 13.20 usec  
PLW1 13.00000000 W

F2 - Processing parameters  
SI 65536  
SF 400.1605411 MHz  
WDW EM  
SSB 0  
LB 0.30 Hz  
GB 0  
PC 1.00

Figure 7: <sup>1</sup>H NMR spectrum of 3c

NRBK-113

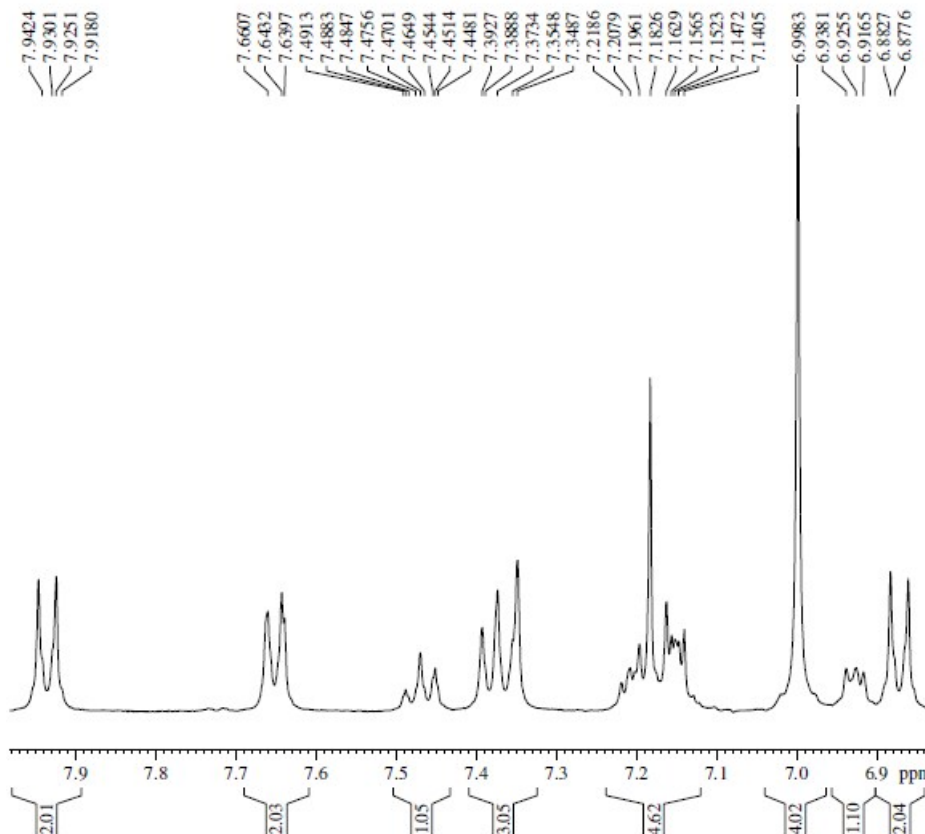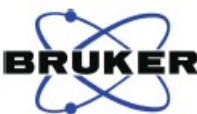

Current Data Parameters  
NAME 24-July-AN-2017  
EXPNO 340  
PROCNO 1

F2 - Acquisition Parameters  
Date\_ 20170725  
Time 7.25  
INSTRUM spect  
PROBHD 5 mm PABBO BB/  
PULPROG zg30  
TD 65536  
SOLVENT CDCl3  
NS 8  
DS 2  
SWH 8012.820 Hz  
FIDRES 0.122266 Hz  
AQ 4.0894465 sec  
RG 159.22  
DW 62.400 usec  
DE 6.50 usec  
TE 300.0 K  
D1 1.00000000 sec  
TD0 1

==== CHANNEL f1 ====  
SFO1 400.1629712 MHz  
NUC1 1H  
P1 13.20 usec  
PLW1 13.00000000 W

F2 - Processing parameters  
SI 65536  
SF 400.1605411 MHz  
WDW EM  
SSB 0  
LB 0.30 Hz  
GB 0  
PC 1.00

Figure 8: <sup>1</sup>H NMR spectrum of 3c (expansion)

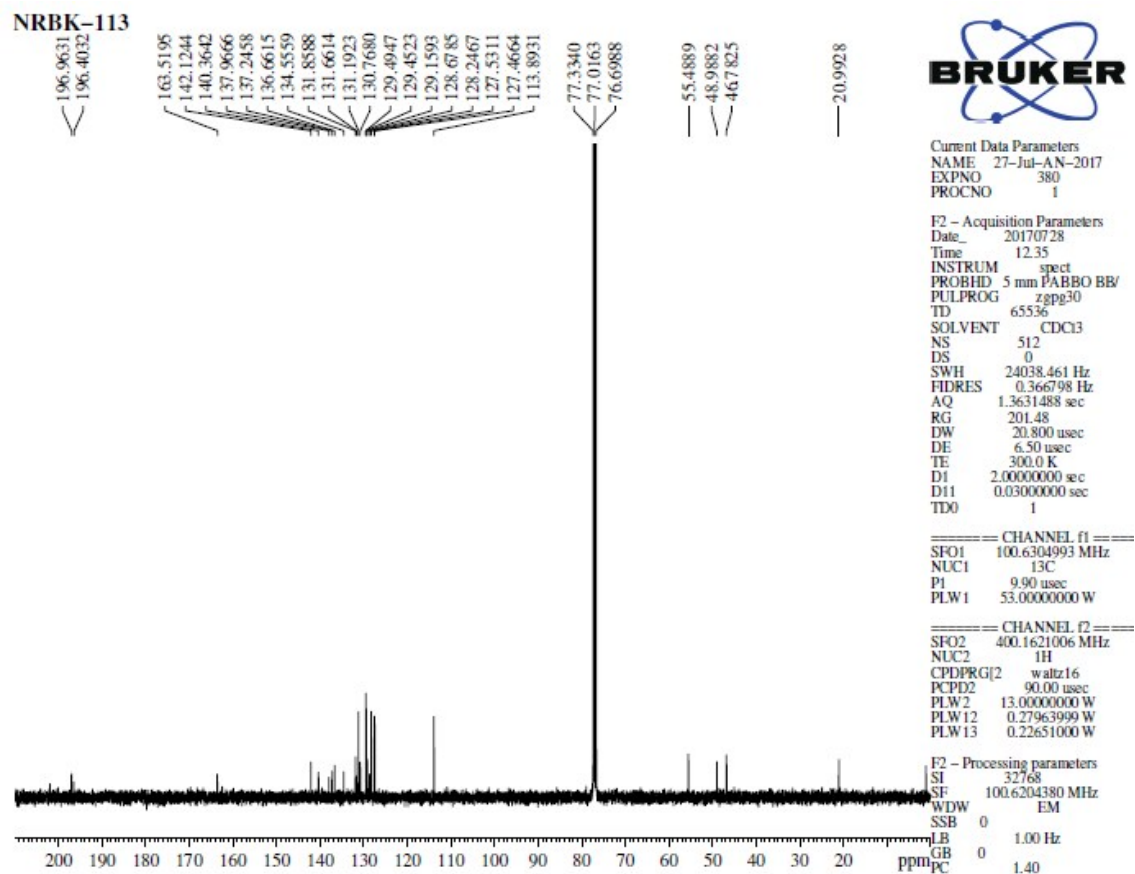

Figure 9:  $^{13}\text{C}$  NMR spectrum of 3c

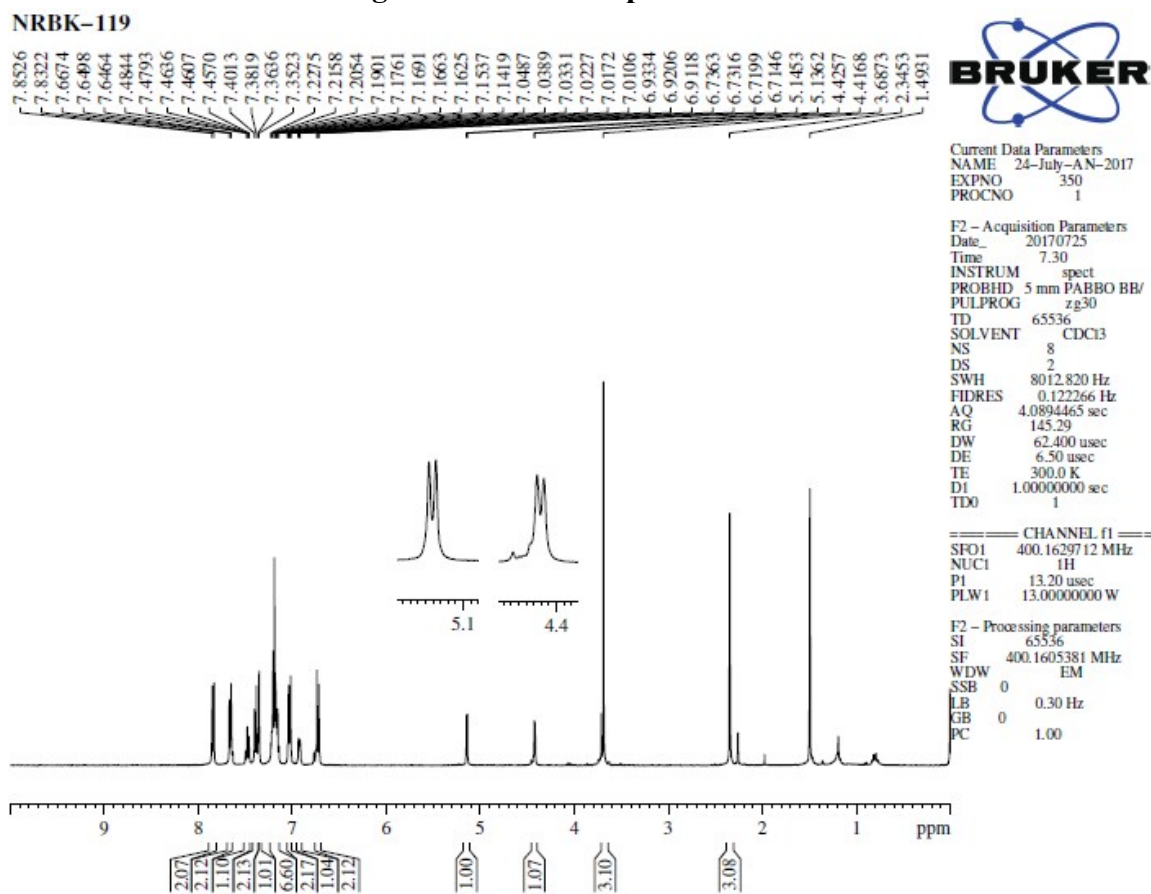

Figure 10:  $^1\text{H}$  NMR spectrum of 3d

NRBK-119

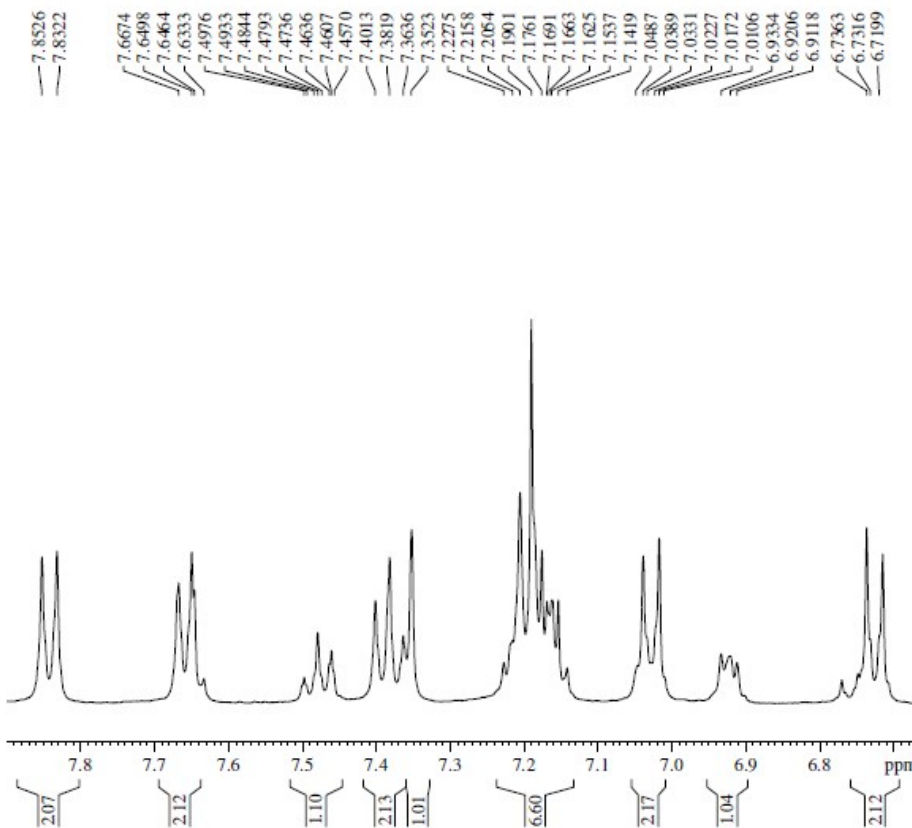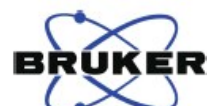

Current Data Parameters  
 NAME 24-July-AN-2017  
 EXPNO 350  
 PROCNO 1

F2 - Acquisition Parameters  
 Date\_ 20170725  
 Time 7.30  
 INSTRUM spect  
 PROBHD 5 mm PABBO BB/  
 PULPROG zg30  
 TD 65536  
 SOLVENT CDC13  
 NS 8  
 DS 2  
 SWH 8012.820 Hz  
 HDRES 0.122266 Hz  
 AQ 4.0894465 sec  
 RG 145.29  
 DW 62.400 usec  
 DE 6.50 usec  
 TE 300.0 K  
 D1 1.00000000 sec  
 TDO 1

==== CHANNEL f1 ====  
 SFO1 400.1629712 MHz  
 NUC1 1H  
 P1 13.20 usec  
 PLW1 13.00000000 W

F2 - Processing parameters  
 SI 65536  
 SF 400.1605381 MHz  
 WDW EM  
 SSB 0  
 LB 0.30 Hz  
 GB 0  
 PC 1.00

Figure 11: <sup>1</sup>H NMR spectrum of 3d (expansion)

NRBK-119

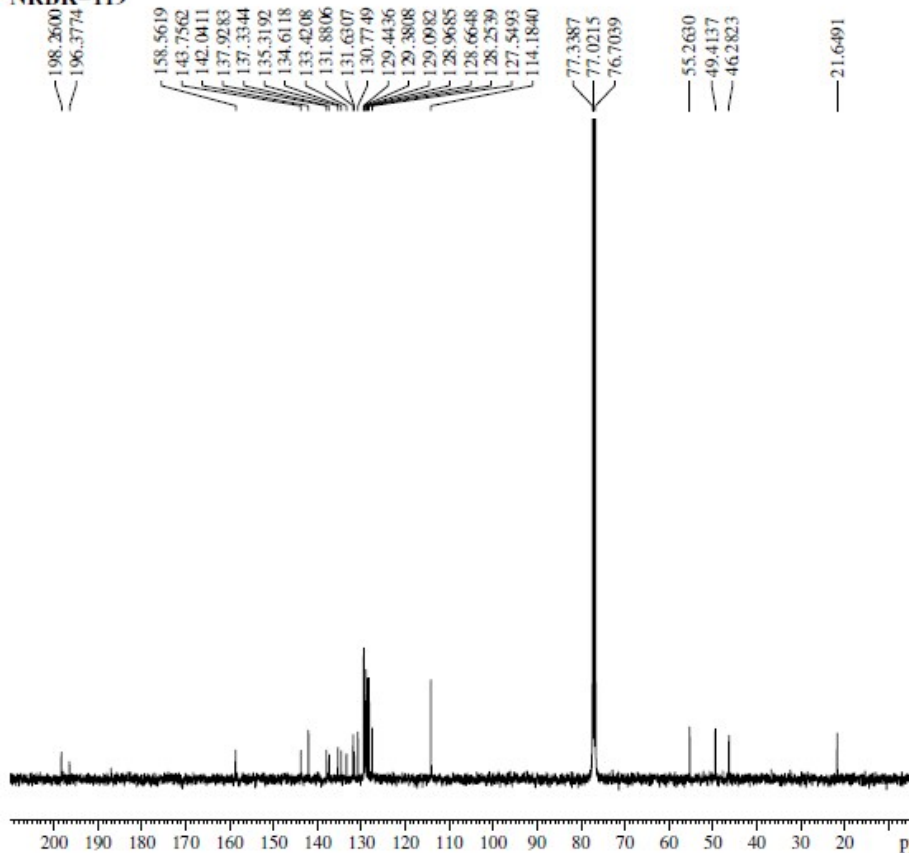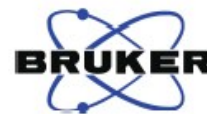

Current Data Parameters  
 NAME 27-Jul-AN-2017  
 EXPNO 400  
 PROCNO 1

F2 - Acquisition Parameters  
 Date\_ 20170728  
 Time 12.50  
 INSTRUM spect  
 PROBHD 5 mm PABBO BB/  
 PULPROG zgpg30  
 TD 65536  
 SOLVENT CDC13  
 NS 512  
 DS 0  
 SWH 24038.461 Hz  
 FIDRES 0.366798 Hz  
 AQ 1.3631488 sec  
 RG 201.48  
 DW 20.800 usec  
 DE 6.50 usec  
 TE 300.0 K  
 D1 2.00000000 sec  
 D11 0.03000000 sec  
 TDO 1

==== CHANNEL f1 ====  
 SFO1 100.6304993 MHz  
 NUC1 13C  
 P1 9.90 usec  
 PLW1 53.00000000 W

==== CHANNEL f2 ====  
 SFO2 400.1621006 MHz  
 NUC2 1H  
 CPDPRG2 waltz16  
 PCPD2 90.00 usec  
 PLW2 13.00000000 W  
 PLW12 0.27963999 W  
 PLW13 0.22651000 W

F2 - Processing parameters  
 SI 32768  
 SF 100.6204380 MHz  
 WDW EM  
 SSB 0  
 LB 3.00 Hz  
 GB 0  
 PC 1.40

Figure 12: <sup>13</sup>C NMR spectrum of 3d

NRBK-121

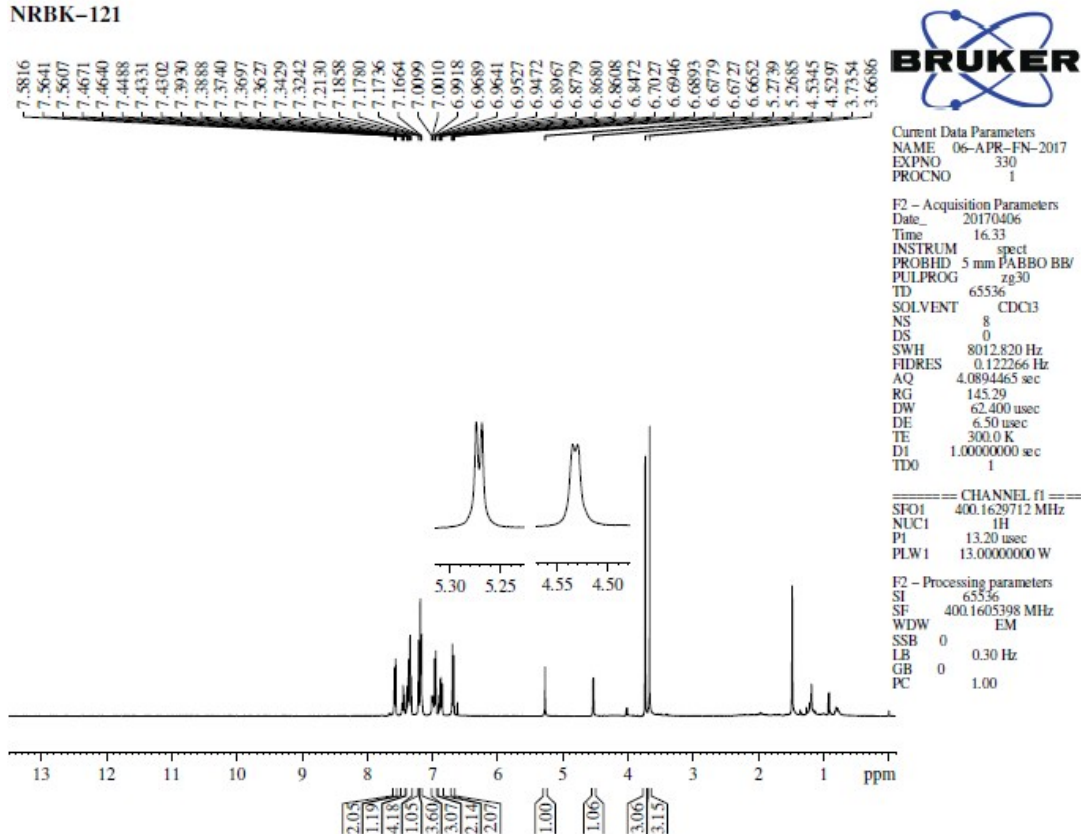

Figure 13: <sup>1</sup>H NMR spectrum of 3e

NRBK-121

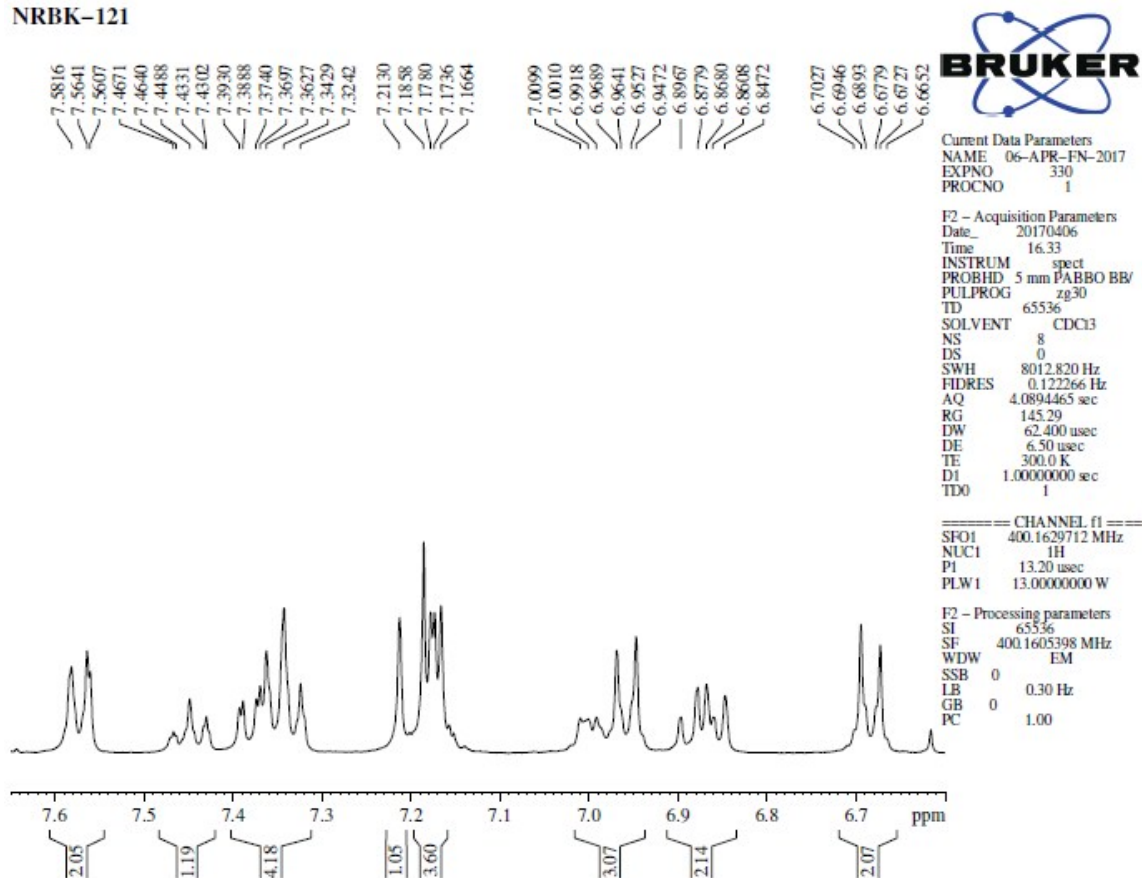

Figure 14: <sup>1</sup>H NMR spectrum of 3e (expansion)



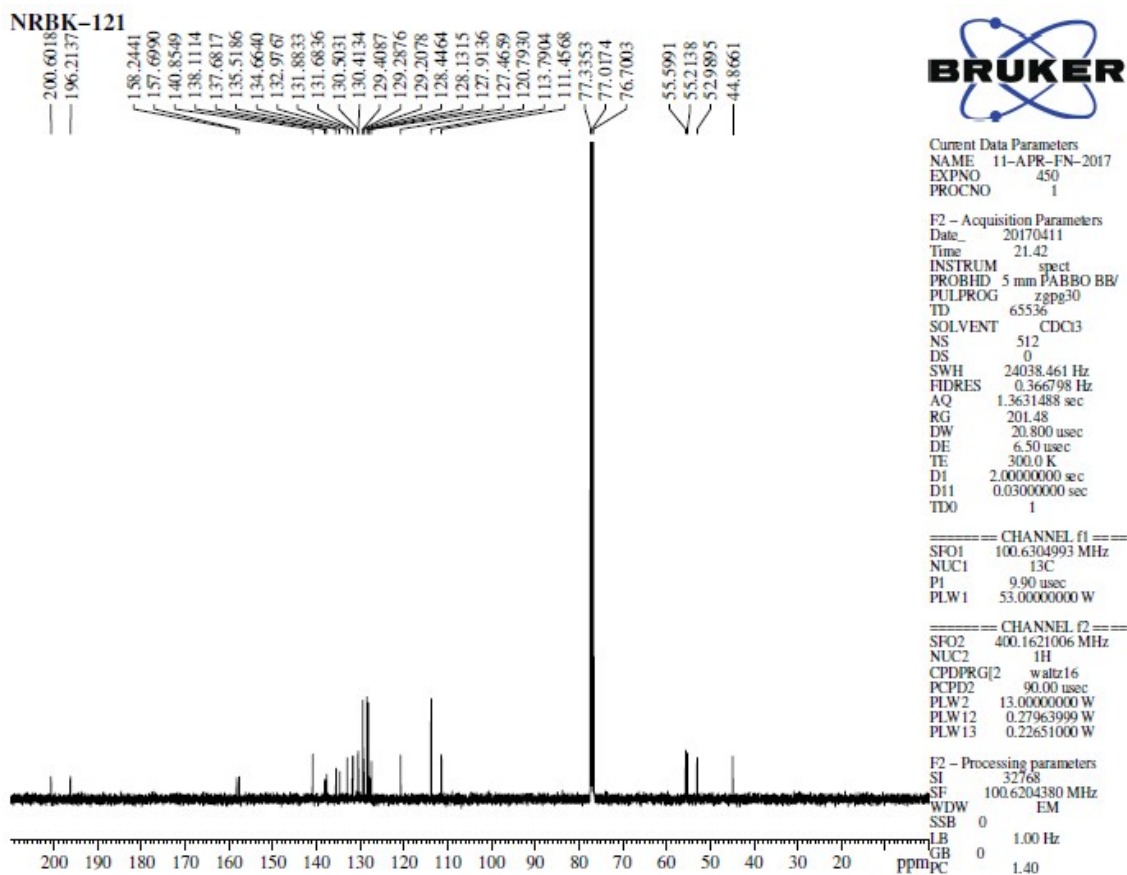

Figure 15: <sup>13</sup>C NMR spectrum of 3e

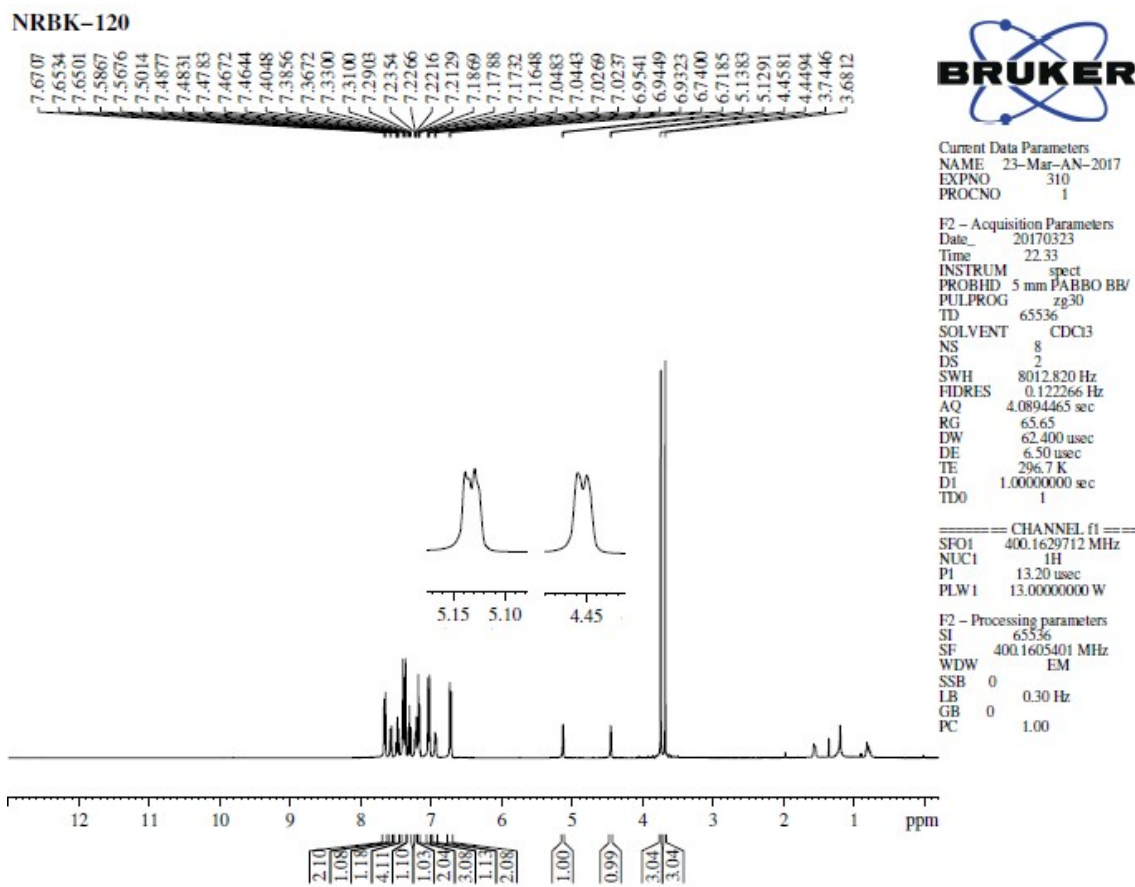

Figure 16: <sup>1</sup>H NMR spectrum of 3f

NRBK-120

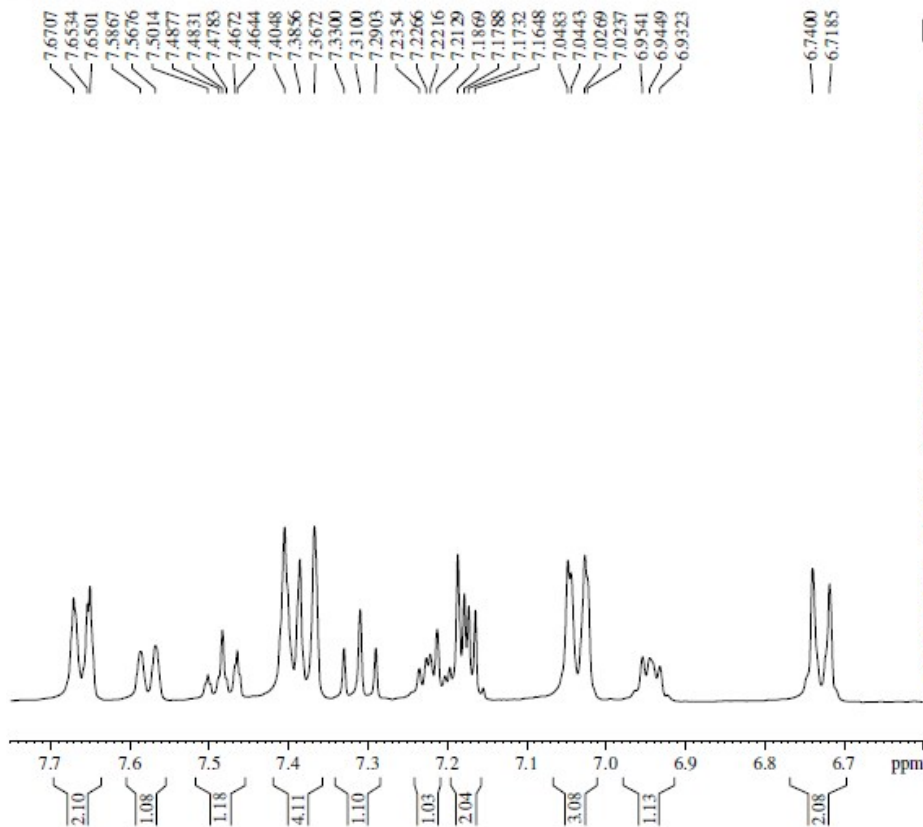

Figure 17: <sup>1</sup>H NMR spectrum of 3f (expansion)

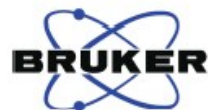

Current Data Parameters  
 NAME 23-Mar-AN-2017  
 EXPNO 310  
 PROCNO 1

F2 - Acquisition Parameters  
 Date\_ 20170323  
 Time 22.33  
 INSTRUM spect  
 PROBHD 5 mm PABBO BB  
 PULPROG zg30  
 TD 65536  
 SOLVENT CDCl3  
 NS 8  
 DS 2  
 SWH 8012.820 Hz  
 FIDRES 0.122266 Hz  
 AQ 4.0894465 sec  
 RG 65.65  
 DW 62.400 usec  
 DE 6.50 usec  
 TE 296.7 K  
 D1 1.0000000 sec  
 TDO 1

==== CHANNEL f1 ====  
 SFO1 400.1629712 MHz  
 NUC1 1H  
 P1 13.20 usec  
 PLW1 13.0000000 W

F2 - Processing parameters  
 SI 65536  
 SF 400.1605401 MHz  
 WDW EM  
 SSB 0  
 LB 0.30 Hz  
 GB 0  
 PC 1.00

NRBK-120

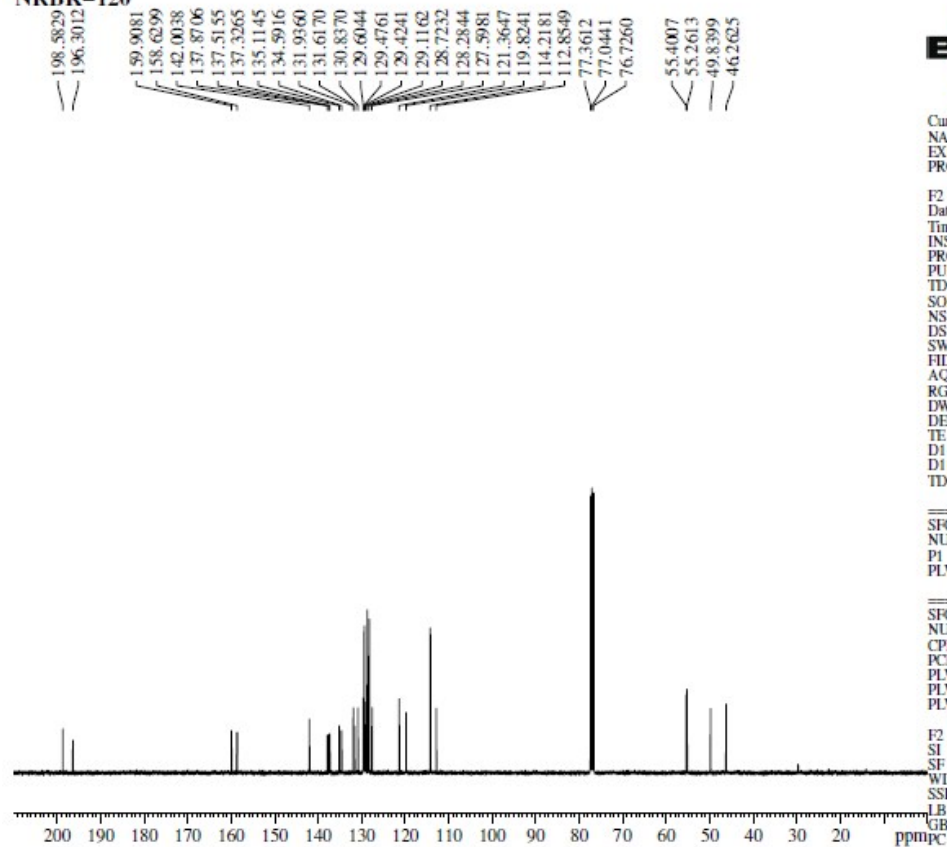

Figure 18: <sup>13</sup>C NMR spectrum of 3f

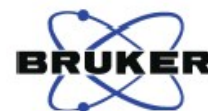

Current Data Parameters  
 NAME 29-Mar-FN-2017  
 EXPNO 340  
 PROCNO 1

F2 - Acquisition Parameters  
 Date\_ 20170330  
 Time 0.53  
 INSTRUM spect  
 PROBHD 5 mm PABBO BB  
 PULPROG zgpg30  
 TD 65536  
 SOLVENT CDCl3  
 NS 512  
 DS 0  
 SWH 24038.461 Hz  
 FIDRES 0.366798 Hz  
 AQ 1.3631488 sec  
 RG 201.48  
 DW 20.800 usec  
 DE 6.50 usec  
 TE 299.5 K  
 D1 2.0000000 sec  
 D11 0.0300000 sec  
 TDO 1

==== CHANNEL f1 ====  
 SFO1 100.6304993 MHz  
 NUC1 13C  
 P1 9.90 usec  
 PLW1 53.0000000 W

==== CHANNEL f2 ====  
 SFO2 400.1621006 MHz  
 NUC2 1H  
 CPDPRG2 waltz16  
 PCPD2 90.00 usec  
 PLW2 13.0000000 W  
 PLW12 0.27963999 W  
 PLW13 0.22651000 W

F2 - Processing parameters  
 SI 32768  
 SF 100.6204380 MHz  
 WDW EM  
 SSB 0  
 LB 1.00 Hz  
 GB 0  
 PC 1.40

NRBK-114

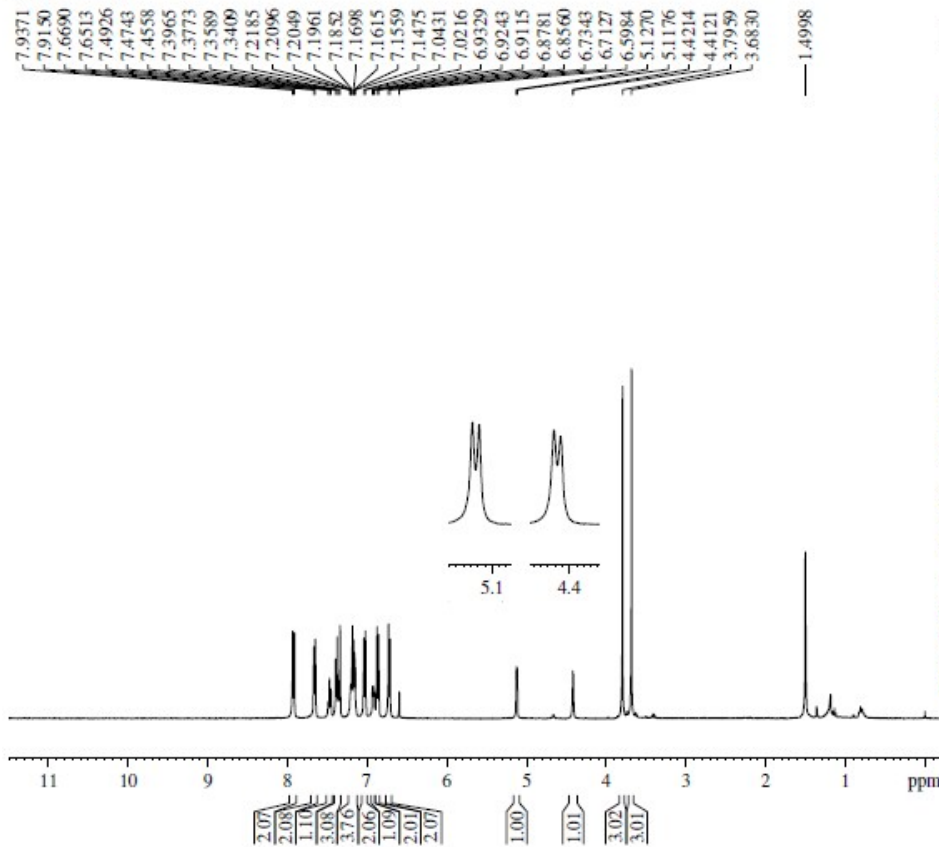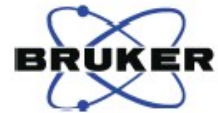

Current Data Parameters  
 NAME 06-APR-FN-2017  
 EXPNO 320  
 PROCNO 1

F2 - Acquisition Parameters  
 Date\_ 20170406  
 Time 16.28  
 INSTRUM spect  
 PROBHD 5 mm PABBO BB/  
 PULPROG zg30  
 TD 65536  
 SOLVENT CDCl3  
 NS 8  
 DS 0  
 SWH 8012.820 Hz  
 FIDRES 0.122266 Hz  
 AQ 4.0894465 sec  
 RG 145.29  
 DW 62.400 usec  
 DE 6.50 usec  
 TE 300.0 K  
 D1 1.00000000 sec  
 TD0 1

==== CHANNEL f1 ====  
 SFO1 400.1629712 MHz  
 NUC1 1H  
 PI 13.20 usec  
 PLW1 13.00000000 W

F2 - Processing parameters  
 SI 65536  
 SF 400.1605401 MHz  
 WDW EM  
 SSB 0  
 LB 0.30 Hz  
 GB 0  
 PC 1.00

Figure 19: <sup>1</sup>H NMR spectrum of 3g

NRBK-114

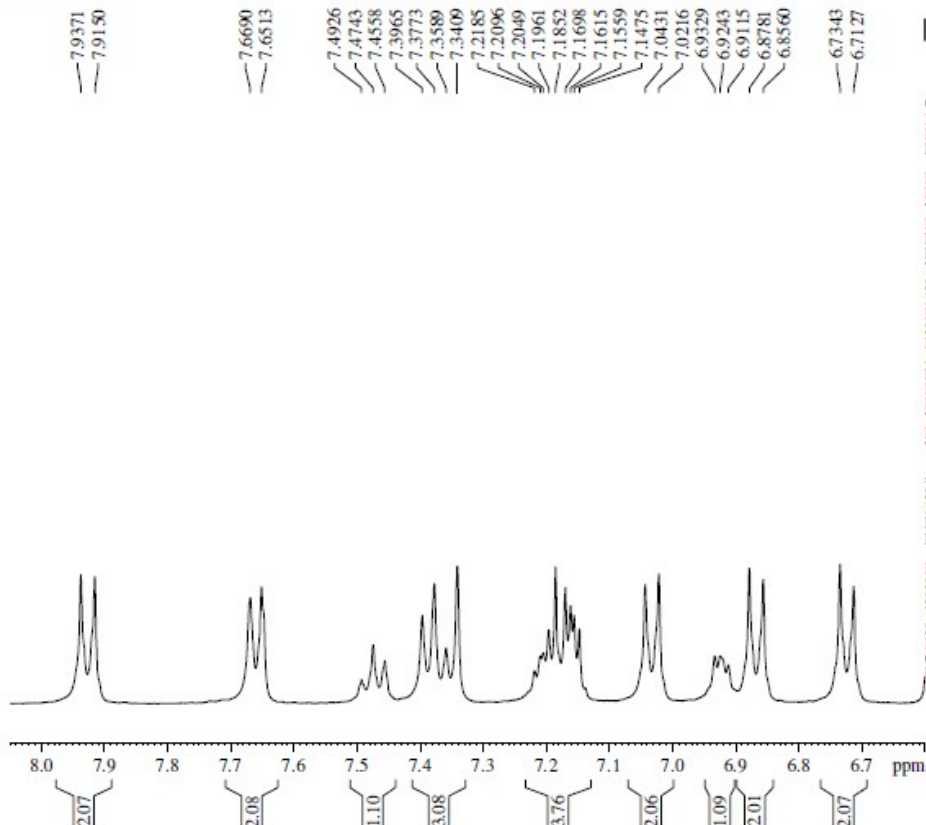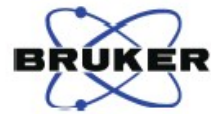

Current Data Parameters  
 NAME 06-APR-FN-2017  
 EXPNO 320  
 PROCNO 1

F2 - Acquisition Parameters  
 Date\_ 20170406  
 Time 16.28  
 INSTRUM spect  
 PROBHD 5 mm PABBO BB/  
 PULPROG zg30  
 TD 65536  
 SOLVENT CDCl3  
 NS 8  
 DS 0  
 SWH 8012.820 Hz  
 FIDRES 0.122266 Hz  
 AQ 4.0894465 sec  
 RG 145.29  
 DW 62.400 usec  
 DE 6.50 usec  
 TE 300.0 K  
 D1 1.00000000 sec  
 TD0 1

==== CHANNEL f1 ====  
 SFO1 400.1629712 MHz  
 NUC1 1H  
 PI 13.20 usec  
 PLW1 13.00000000 W

F2 - Processing parameters  
 SI 65536  
 SF 400.1605401 MHz  
 WDW EM  
 SSB 0  
 LB 0.30 Hz  
 GB 0  
 PC 1.00

Figure 20: <sup>1</sup>H NMR spectrum of 3g (expansion)

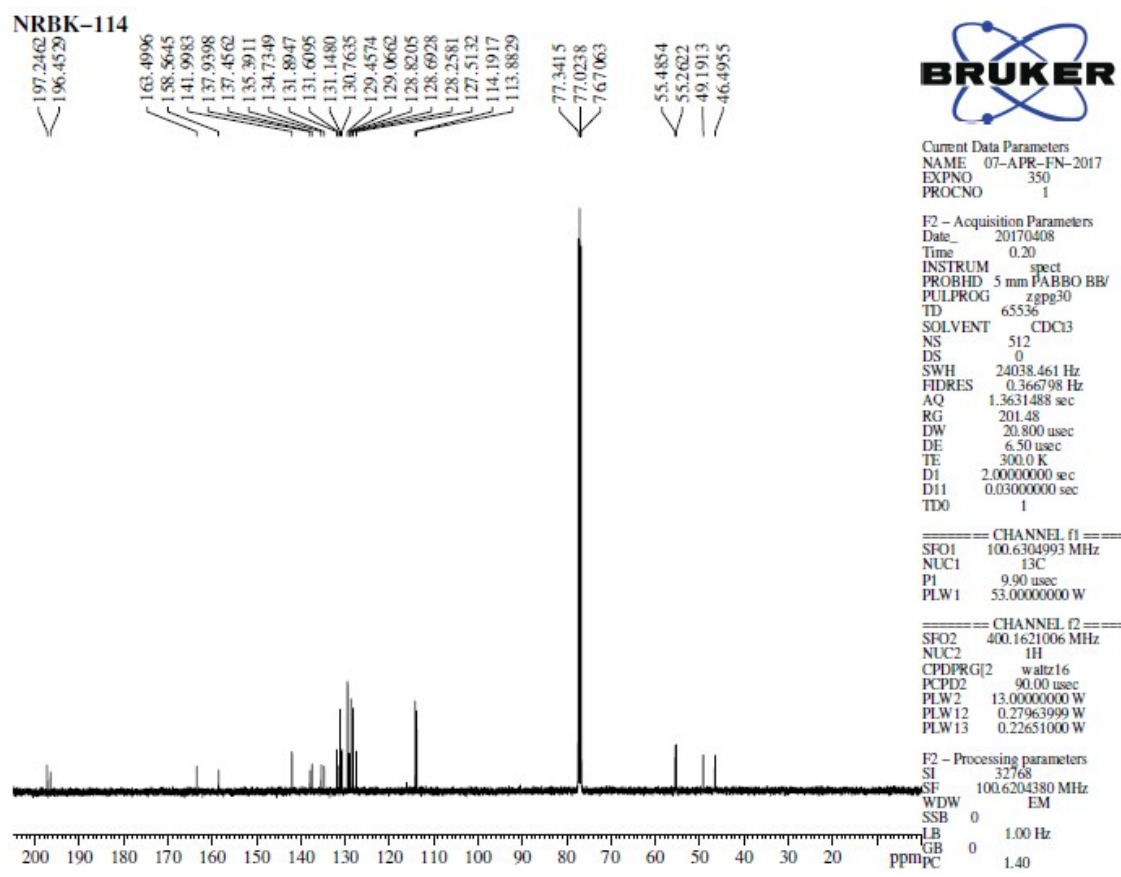

Figure 21: <sup>13</sup>C NMR spectrum of 3g

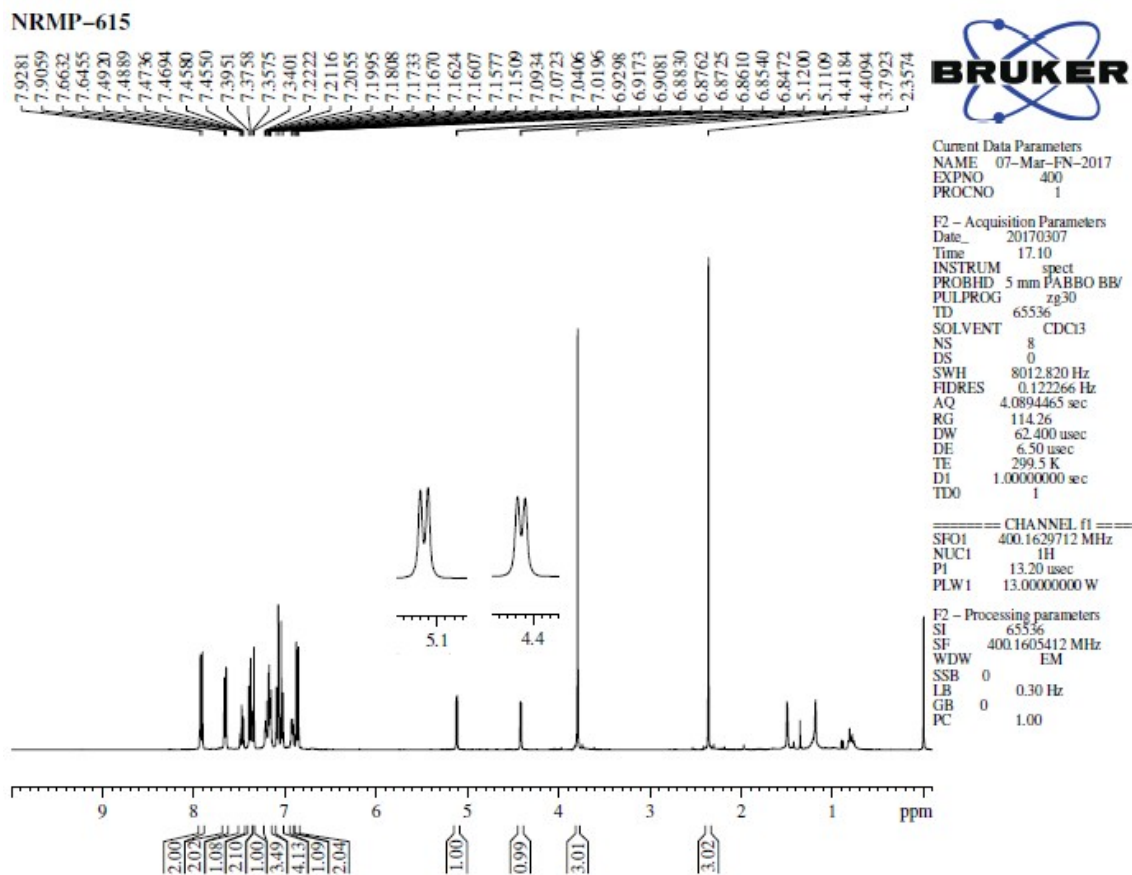

Figure 22: <sup>1</sup>H NMR spectrum of 3h

NRMP-615

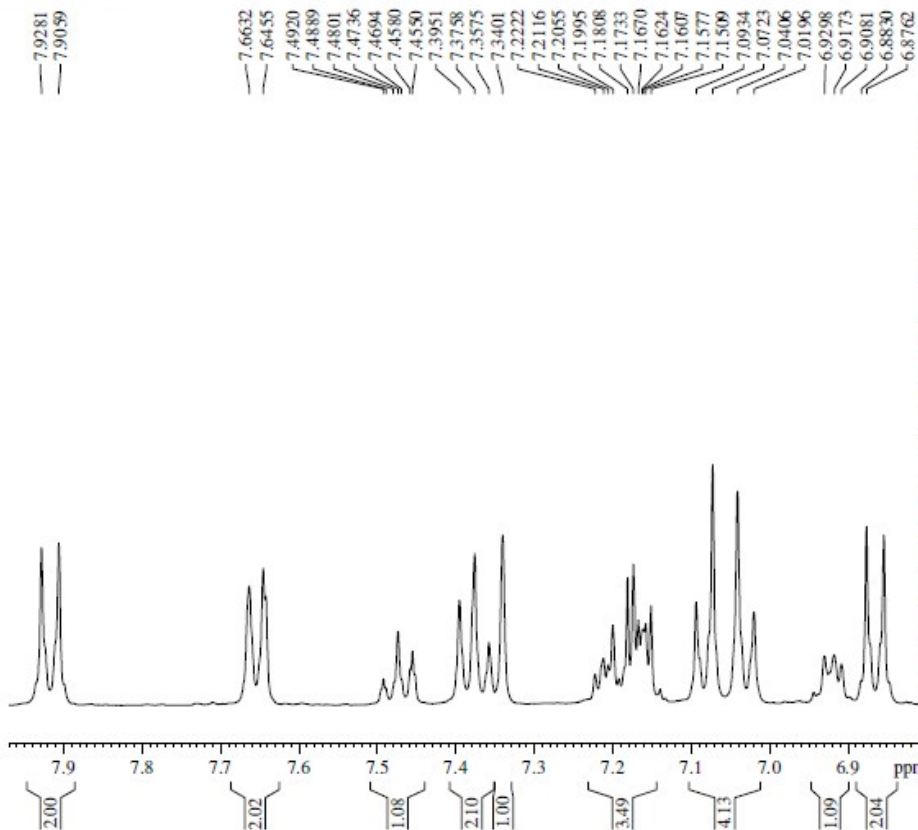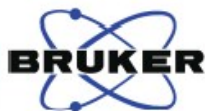

Current Data Parameters  
 NAME 07-Mar-FN-2017  
 EXPNO 400  
 PROCNO 1

F2 - Acquisition Parameters  
 Date\_ 20170307  
 Time 17.10  
 INSTRUM spect  
 PROBHD 5 mm PABBO BB/  
 PULPROG zg30  
 TD 65536  
 SOLVENT CDCl3  
 NS 8  
 DS 0  
 SWH 8012.820 Hz  
 FIDRES 0.122266 Hz  
 AQ 4.0894465 sec  
 RG 114.26  
 DW 62.400 usec  
 DE 6.50 usec  
 TE 299.5 K  
 D1 1.0000000 sec  
 TDO 1

==== CHANNEL f1 ====  
 SFO1 400.1629712 MHz  
 NUC1 1H  
 P1 13.20 usec  
 PLW1 13.0000000 W

F2 - Processing parameters  
 SI 65536  
 SF 400.1605412 MHz  
 WDW EM  
 SSB 0  
 LB 0.30 Hz  
 GB 0  
 PC 1.00

Figure 23: <sup>1</sup>H NMR spectrum of 3h (expansion)

NRMP-615

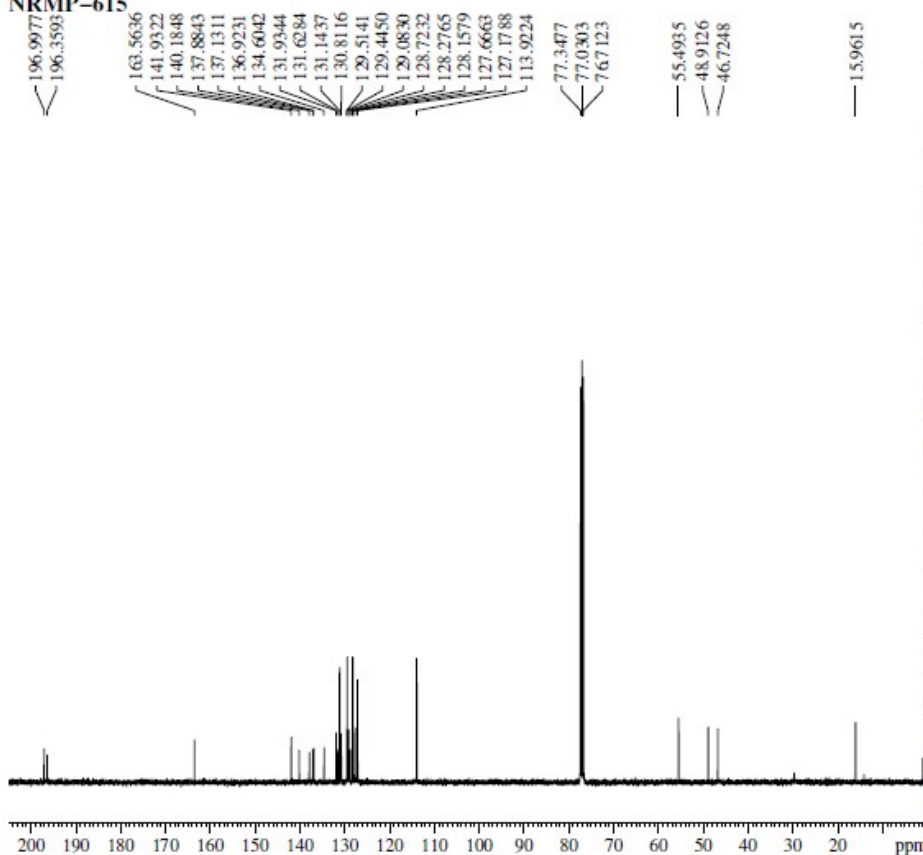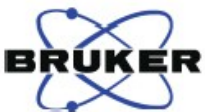

Current Data Parameters  
 NAME 24-Mar-AN-2017  
 EXPNO 310  
 PROCNO 1

F2 - Acquisition Parameters  
 Date\_ 20170325  
 Time 18.10  
 INSTRUM spect  
 PROBHD 5 mm PABBO BB/  
 PULPROG zgpg30  
 TD 65536  
 SOLVENT CDCl3  
 NS 512  
 DS 0  
 SWH 24038.461 Hz  
 FIDRES 0.366798 Hz  
 AQ 1.3631488 sec  
 RG 201.48  
 DW 20.800 usec  
 DE 6.50 usec  
 TE 298.2 K  
 D1 2.0000000 sec  
 D11 0.0300000 sec  
 TDO 1

==== CHANNEL f1 ====  
 SFO1 100.6304993 MHz  
 NUC1 13C  
 P1 9.90 usec  
 PLW1 53.0000000 W

==== CHANNEL f2 ====  
 SFO2 400.1621006 MHz  
 NUC2 1H  
 CPDPRG2 waltz16  
 PCPD2 90.00 usec  
 PLW2 13.0000000 W  
 PLW12 0.27963999 W  
 PLW13 0.22651000 W

F2 - Processing parameters  
 SI 32768  
 SF 100.6204380 MHz  
 WDW EM  
 SSB 0  
 LB 1.00 Hz  
 GB 0  
 PC 1.40

Figure 24: <sup>13</sup>C NMR spectrum of 3h

NRBK-112

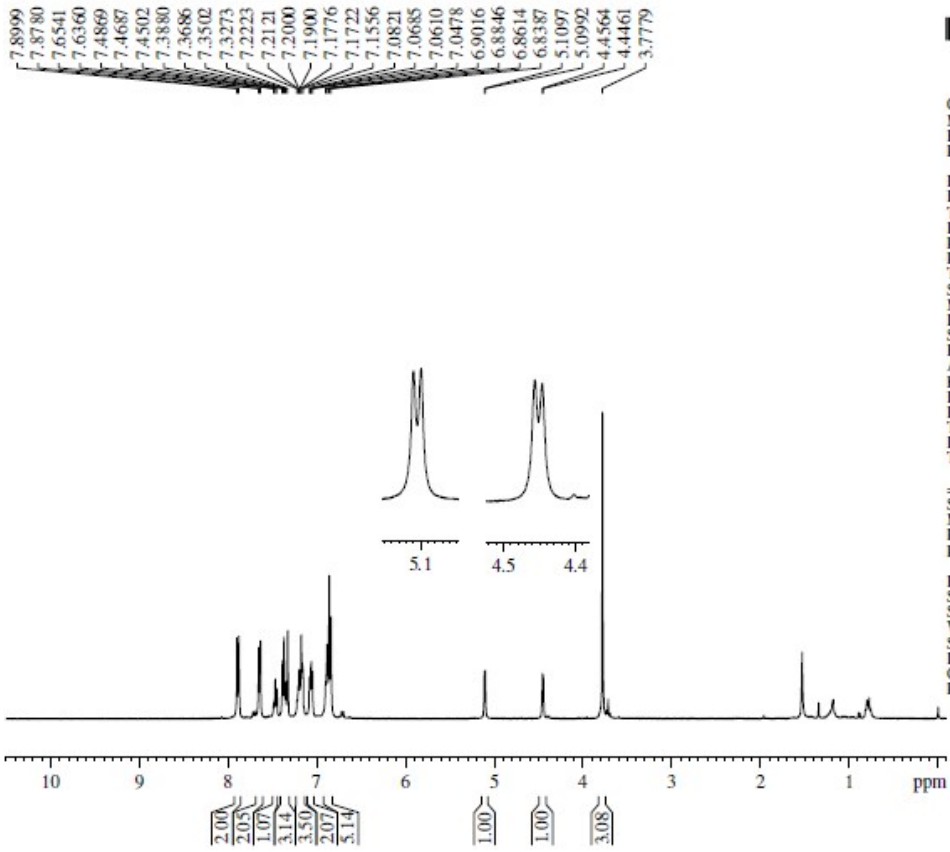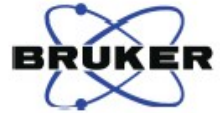

Current Data Parameters  
NAME 24-Mar-FN 2017  
EXPNO 310  
PROCNO 1

F2 - Acquisition Parameters  
Date\_ 20170324  
Time 15.33  
INSTRUM spect  
PROBHD 5 mm PABBO BB  
PULPROG zg30  
TD 65536  
SOLVENT CDC13  
NS 8  
DS 0  
SWH 8012.820 Hz  
FIDRES 0.122266 Hz  
AQ 4.0894465 sec  
RG 89.7  
DW 62.400 usec  
DE 6.50 usec  
TE 296.2 K  
D1 1.00000000 sec  
TD0 1

==== CHANNEL f1 ====  
SFO1 400.1629712 MHz  
NUC1 1H  
P1 13.20 usec  
PLW1 13.00000000 W

F2 - Processing parameters  
SI 65536  
SF 400.1605455 MHz  
WDW no  
SSB 0  
LB 0 Hz  
GB 0  
PC 1.00

Figure 25: <sup>1</sup>H NMR spectrum of 3i

NRBK-112

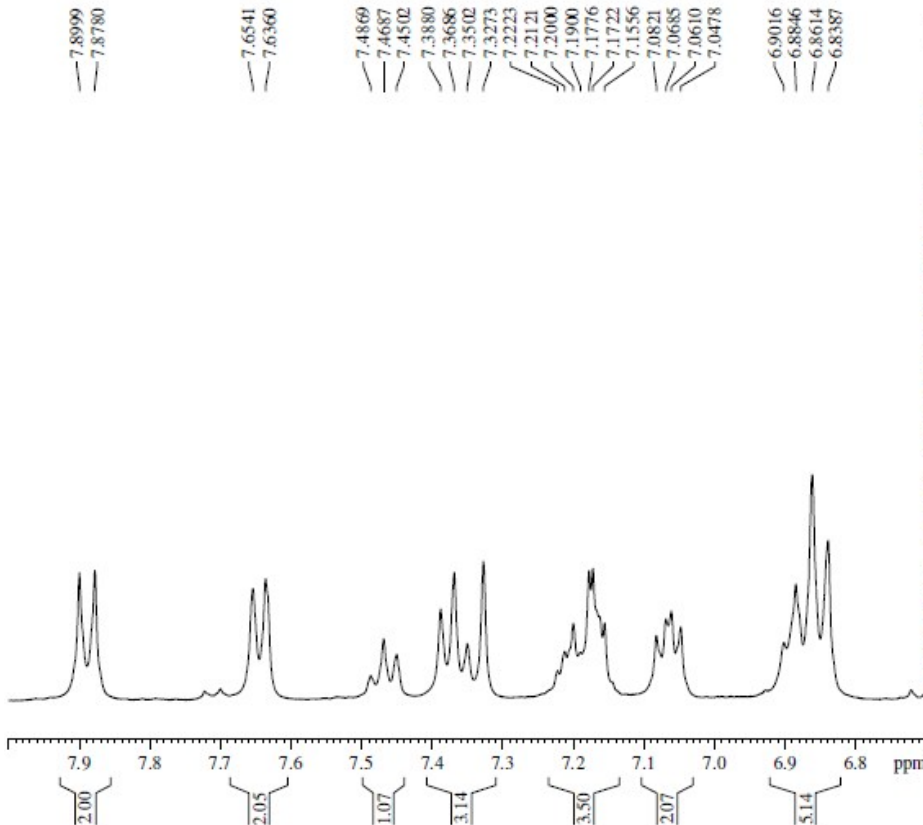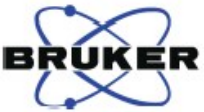

Current Data Parameters  
NAME 24-Mar-FN 2017  
EXPNO 310  
PROCNO 1

F2 - Acquisition Parameters  
Date\_ 20170324  
Time 15.33  
INSTRUM spect  
PROBHD 5 mm PABBO BB  
PULPROG zg30  
TD 65536  
SOLVENT CDC13  
NS 8  
DS 0  
SWH 8012.820 Hz  
FIDRES 0.122266 Hz  
AQ 4.0894465 sec  
RG 89.7  
DW 62.400 usec  
DE 6.50 usec  
TE 296.2 K  
D1 1.00000000 sec  
TD0 1

==== CHANNEL f1 ====  
SFO1 400.1629712 MHz  
NUC1 1H  
P1 13.20 usec  
PLW1 13.00000000 W

F2 - Processing parameters  
SI 65536  
SF 400.1605455 MHz  
WDW no  
SSB 0  
LB 0 Hz  
GB 0  
PC 1.00

Figure 26: <sup>1</sup>H NMR spectrum of 3i (expansion)

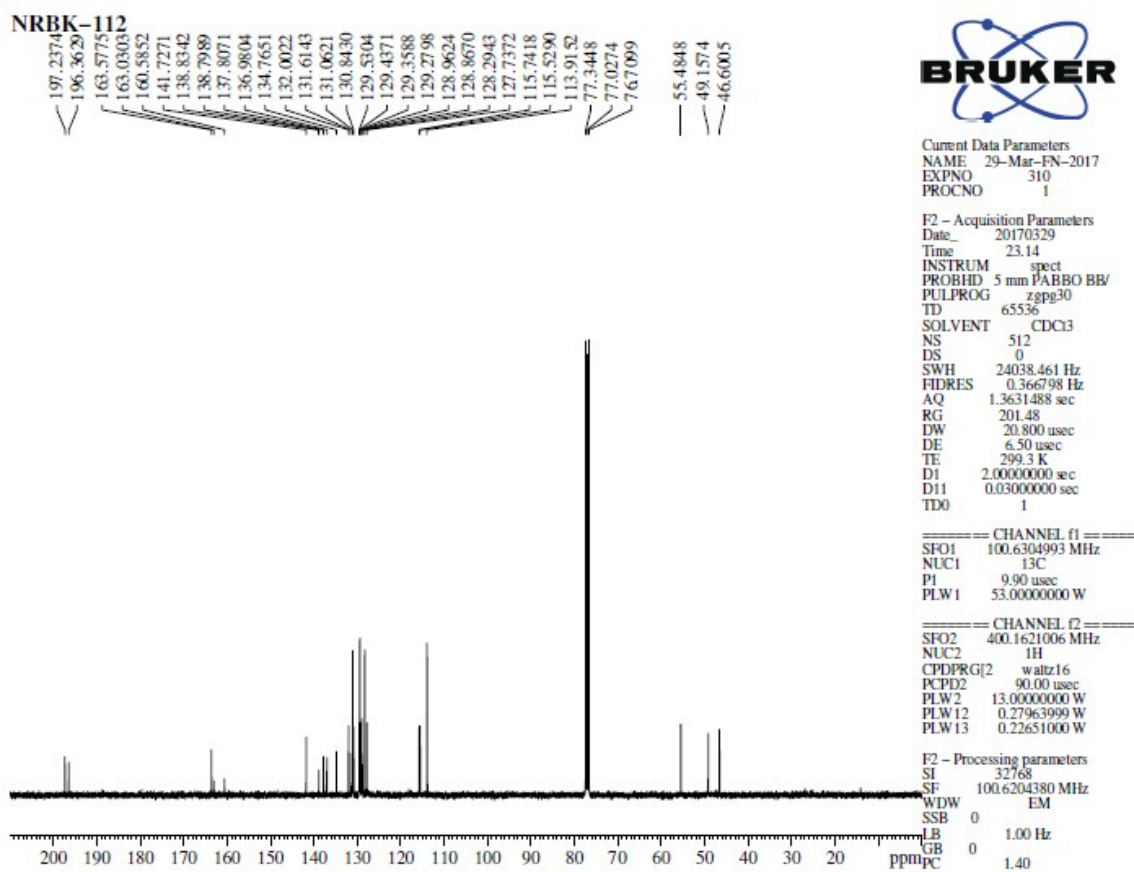

Figure 27:  $^{13}\text{C}$  NMR spectrum of 3i

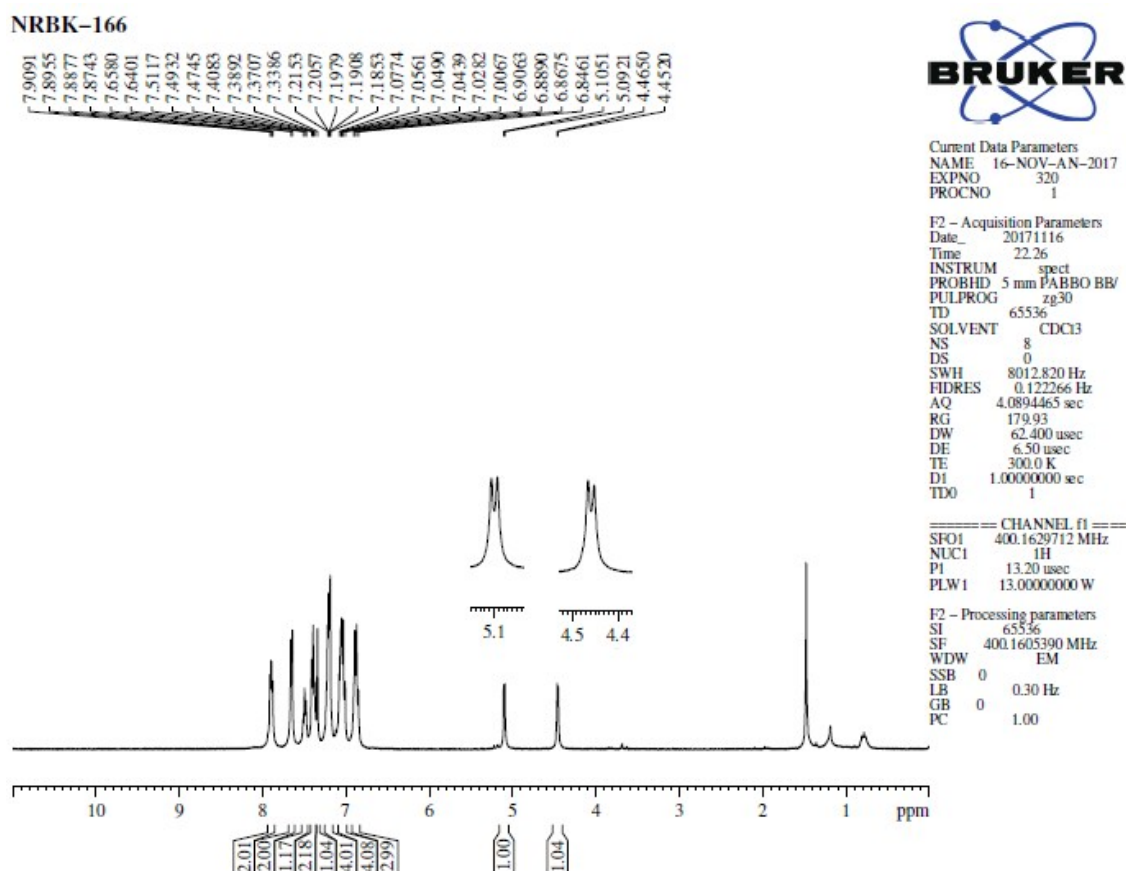

Figure 28:  $^1\text{H}$  NMR spectrum of 3j

NRBK-166

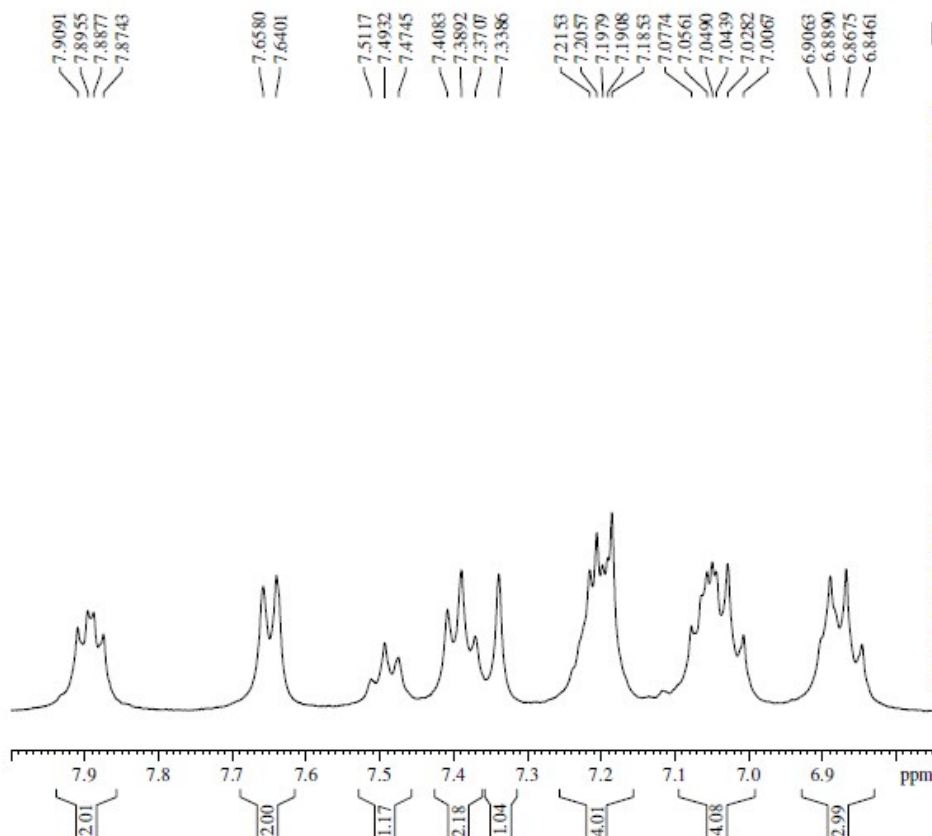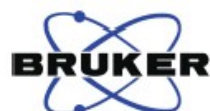

Current Data Parameters  
 NAME 16-NOV-AN-2017  
 EXPNO 320  
 PROCNO 1

F2 - Acquisition Parameters  
 Date\_ 20171116  
 Time 22.26  
 INSTRUM spect  
 PROBHD 5 mm PABBO BB/  
 PULPROG zg30  
 TD 65536  
 SOLVENT CDCl3  
 NS 8  
 DS 0  
 SWH 8012.820 Hz  
 FIDRES 0.122266 Hz  
 AQ 4.0894465 sec  
 RG 179.93  
 DW 62.400 usec  
 DE 6.50 usec  
 TE 300.0 K  
 D1 1.0000000 sec  
 TD0 1

==== CHANNEL f1 ====  
 SFO1 400.1629712 MHz  
 NUC1 1H  
 P1 13.20 usec  
 PLW1 13.00000000 W

F2 - Processing parameters  
 SI 65536  
 SF 400.1605390 MHz  
 WDW EM  
 SSB 0  
 LB 0.30 Hz  
 GB 0  
 PC 1.00

Figure 29: <sup>1</sup>H NMR spectrum of 3j (expansion)

NRBK-166

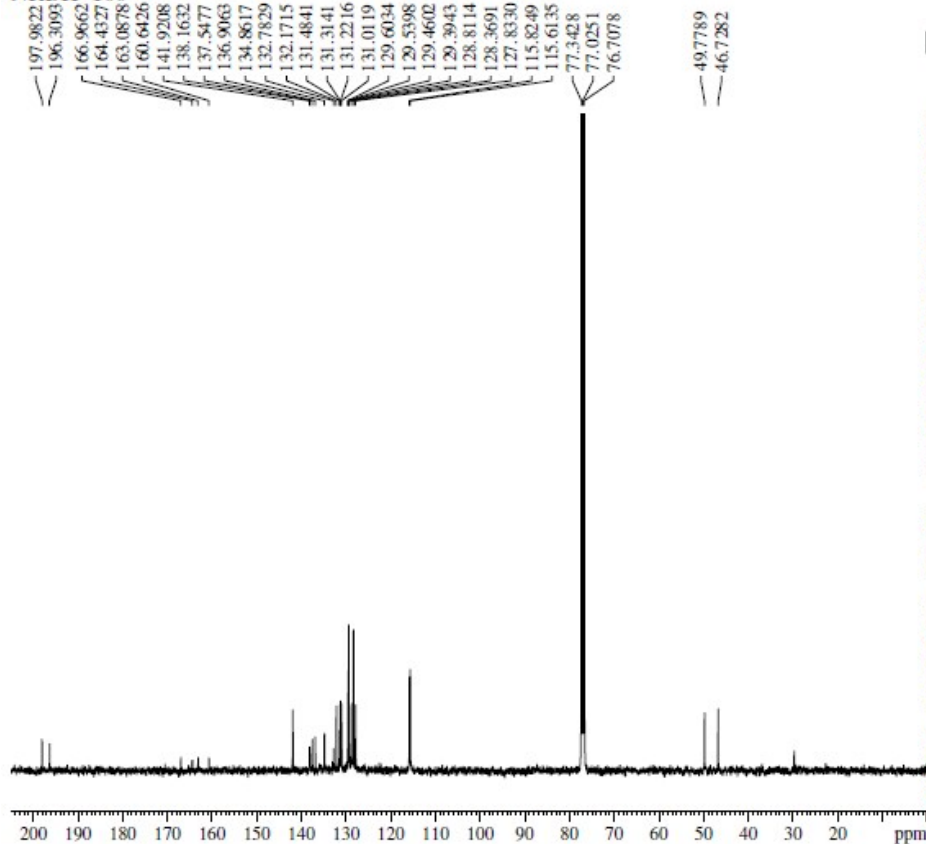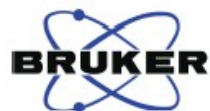

Current Data Parameters  
 NAME 11-Aug-AN-2017  
 EXPNO 310  
 PROCNO 1

F2 - Acquisition Parameters  
 Date\_ 20170811  
 Time 19.27  
 INSTRUM spect  
 PROBHD 5 mm PABBO BB/  
 PULPROG zgpg30  
 TD 65536  
 SOLVENT CDCl3  
 NS 512  
 DS 0  
 SWH 24038.461 Hz  
 FIDRES 0.366798 Hz  
 AQ 1.5631488 sec  
 RG 201.48  
 DW 20.800 usec  
 DE 6.50 usec  
 TE 300.0 K  
 D1 2.0000000 sec  
 D11 0.03000000 sec  
 TD0 1

==== CHANNEL f1 ====  
 SFO1 100.6304993 MHz  
 NUC1 13C  
 P1 9.90 usec  
 PLW1 53.00000000 W

==== CHANNEL f2 ====  
 SFO2 400.1621006 MHz  
 NUC2 1H  
 CPDPRG[2] waltz16  
 PCPD2 90.00 usec  
 PLW2 13.00000000 W  
 PLW12 0.27963999 W  
 PLW13 0.22651000 W

F2 - Processing parameters  
 SI 32768  
 SF 100.6204380 MHz  
 WDW EM  
 SSB 0  
 LB 3.00 Hz  
 GB 0  
 PC 1.40

Figure 30: <sup>13</sup>C NMR spectrum of 3j



NRBK-145

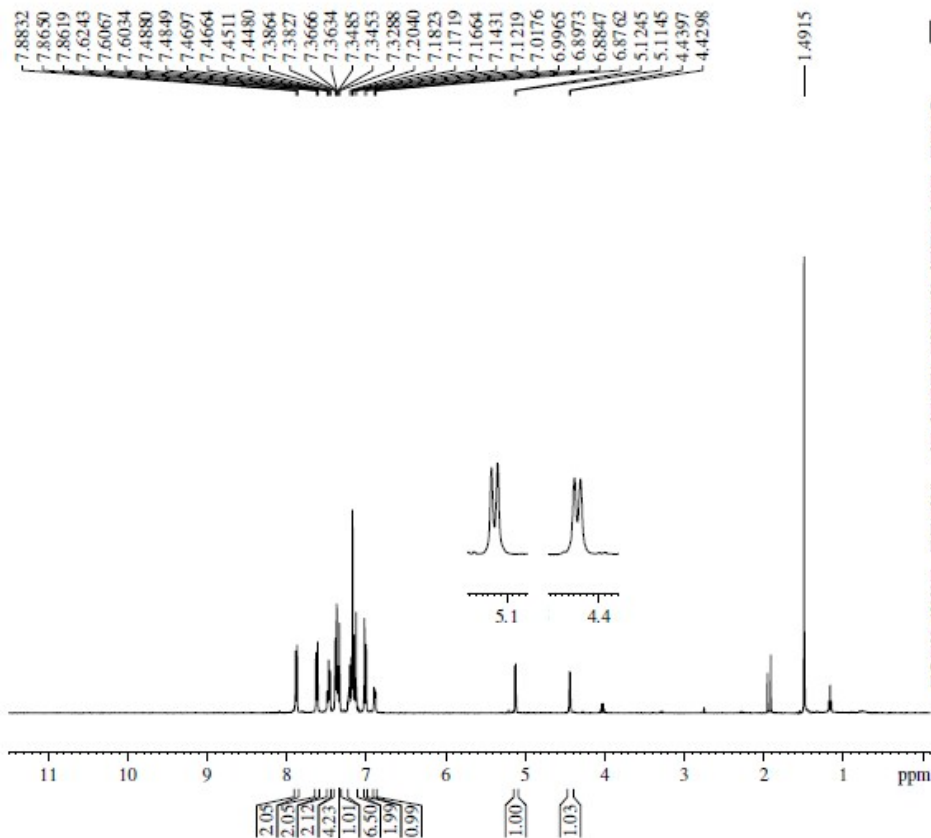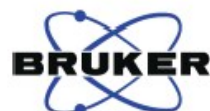

Current Data Parameters  
 NAME 15-May-FN-2017  
 EXPNO 330  
 PROCNO 1

F2 - Acquisition Parameters  
 Date\_ 20170515  
 Time 15.33  
 INSTRUM spect  
 PROBHD 5 mm PABBO BB/  
 PULPROG zg30  
 TD 65536  
 SOLVENT CDCl3  
 NS 8  
 DS 0  
 SWH 8012.820 Hz  
 FIDRES 0.122266 Hz  
 AQ 4.0894465 sec  
 RG 159.22  
 DW 62.400 usec  
 DE 6.50 usec  
 TE 297.3 K  
 D1 1.00000000 sec  
 TDO 1

==== CHANNEL f1 ====  
 SFO1 400.1629712 MHz  
 NUC1 1H  
 P1 13.20 usec  
 PLW1 13.00000000 W

F2 - Processing parameters  
 SI 65536  
 SF 400.1605477 MHz  
 WDW EM  
 SSB 0  
 LB 0.30 Hz  
 GB 0  
 PC 1.00

Figure 31: <sup>1</sup>H NMR spectrum of 3k

NRBK-145

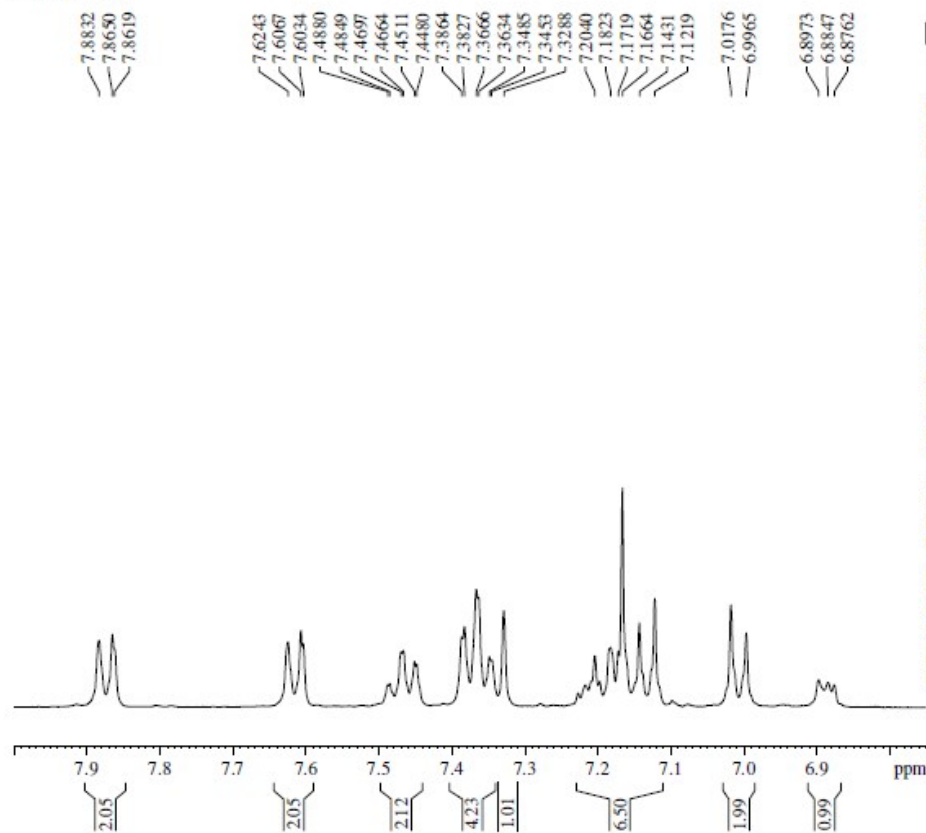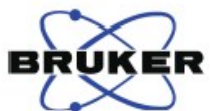

Current Data Parameters  
 NAME 15-May-FN-2017  
 EXPNO 330  
 PROCNO 1

F2 - Acquisition Parameters  
 Date\_ 20170515  
 Time 15.33  
 INSTRUM spect  
 PROBHD 5 mm PABBO BB/  
 PULPROG zg30  
 TD 65536  
 SOLVENT CDCl3  
 NS 8  
 DS 0  
 SWH 8012.820 Hz  
 FIDRES 0.122266 Hz  
 AQ 4.0894465 sec  
 RG 159.22  
 DW 62.400 usec  
 DE 6.50 usec  
 TE 297.3 K  
 D1 1.00000000 sec  
 TDO 1

==== CHANNEL f1 ====  
 SFO1 400.1629712 MHz  
 NUC1 1H  
 P1 13.20 usec  
 PLW1 13.00000000 W

F2 - Processing parameters  
 SI 65536  
 SF 400.1605477 MHz  
 WDW EM  
 SSB 0  
 LB 0.30 Hz  
 GB 0  
 PC 1.00

Figure 32: <sup>1</sup>H NMR spectrum of 3k (expansion)

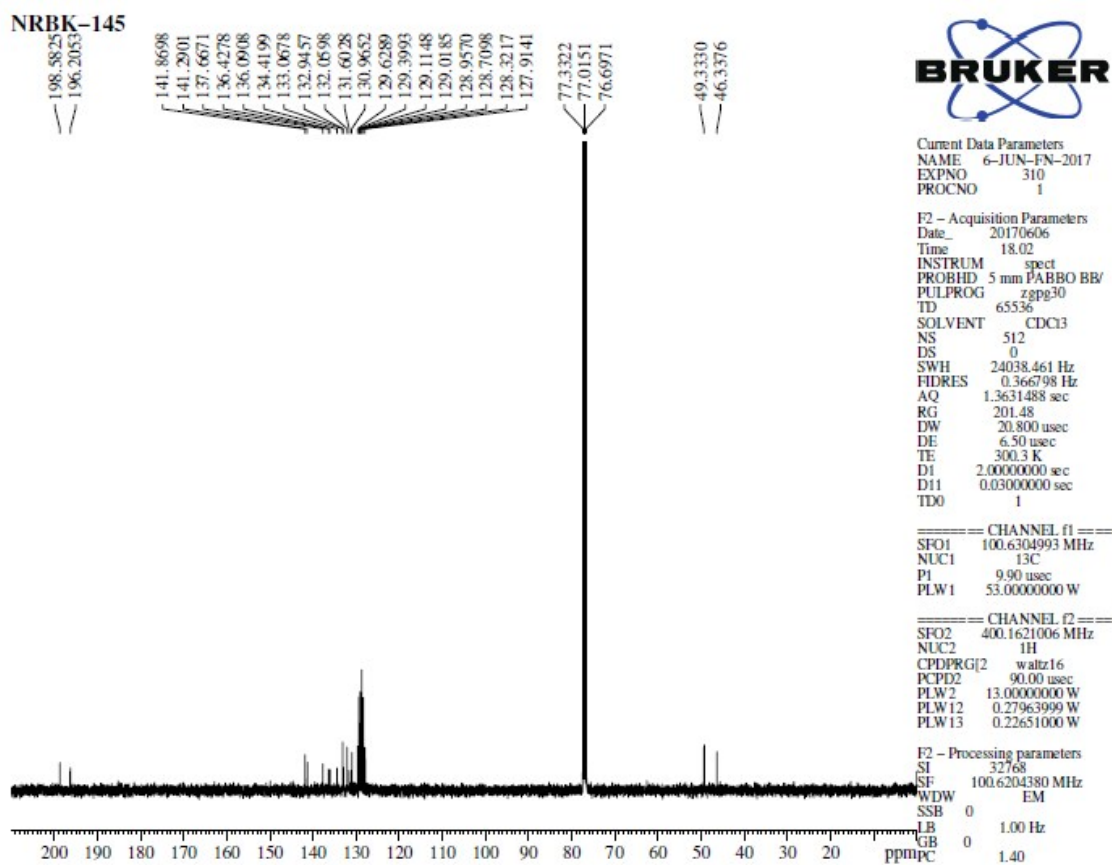

Figure 33: <sup>13</sup>C NMR spectrum of 3k

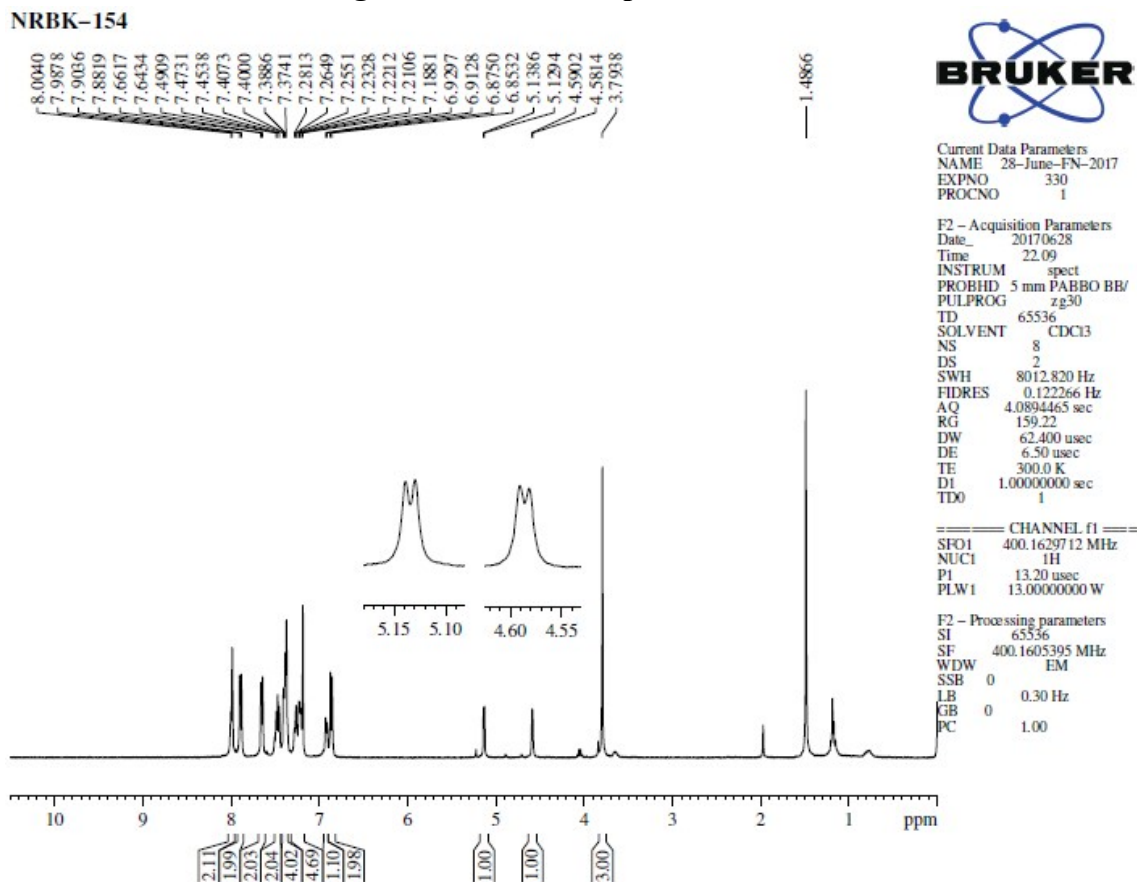

Figure 34: <sup>1</sup>H NMR spectrum of 3l

NRBK-154

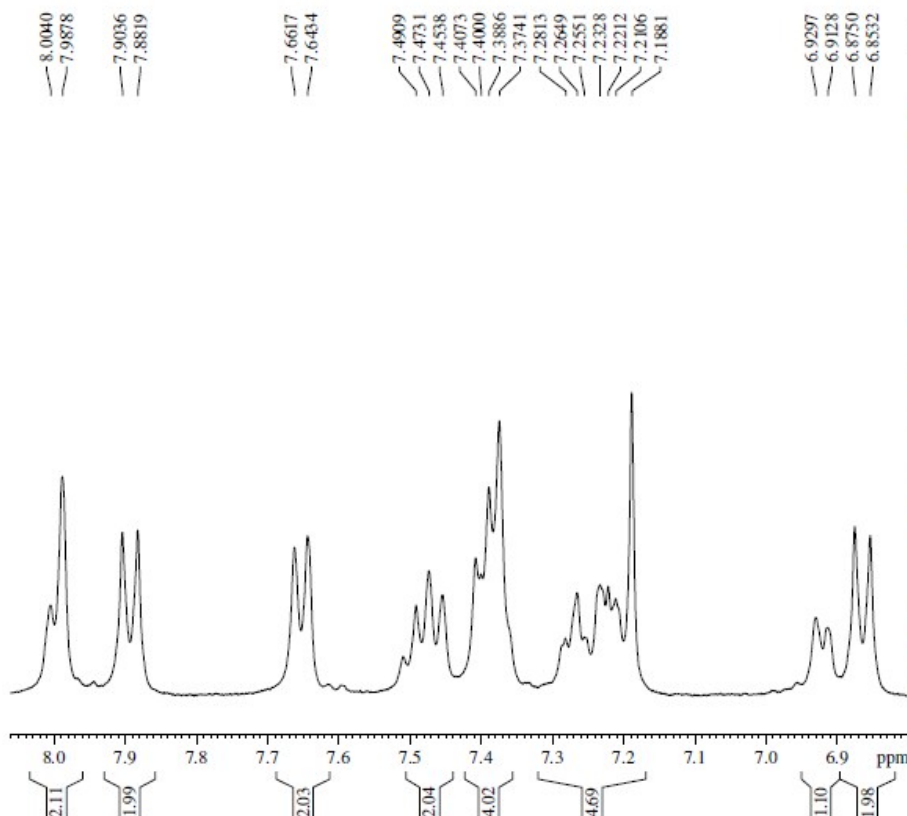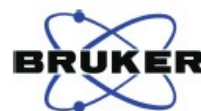

Current Data Parameters  
 NAME 28-Jun-FN-2017  
 EXPNO 330  
 PROCNO 1

F2 - Acquisition Parameters  
 Date\_ 20170628  
 Time 22.09  
 INSTRUM spect  
 PROBHD 5 mm PABBO BB/  
 PULPROG zg30  
 TD 65536  
 SOLVENT CDCl3  
 NS 8  
 DS 2  
 SWH 8012.820 Hz  
 FIDRES 0.122266 Hz  
 AQ 4.0894465 sec  
 RG 159.22  
 DW 62.400 usec  
 DE 6.50 usec  
 TE 300.0 K  
 D1 1.00000000 sec  
 TDO 1

==== CHANNEL f1 ====  
 SFO1 400.1629712 MHz  
 NUC1 1H  
 P1 13.20 usec  
 PLW1 13.00000000 W

F2 - Processing parameters  
 SI 65536  
 SF 400.1605395 MHz  
 WDW EM  
 SSB 0  
 LB 0.30 Hz  
 GB 0  
 PC 1.00

Figure 35: <sup>1</sup>H NMR spectrum of 3l (expansion)

NRBK 154

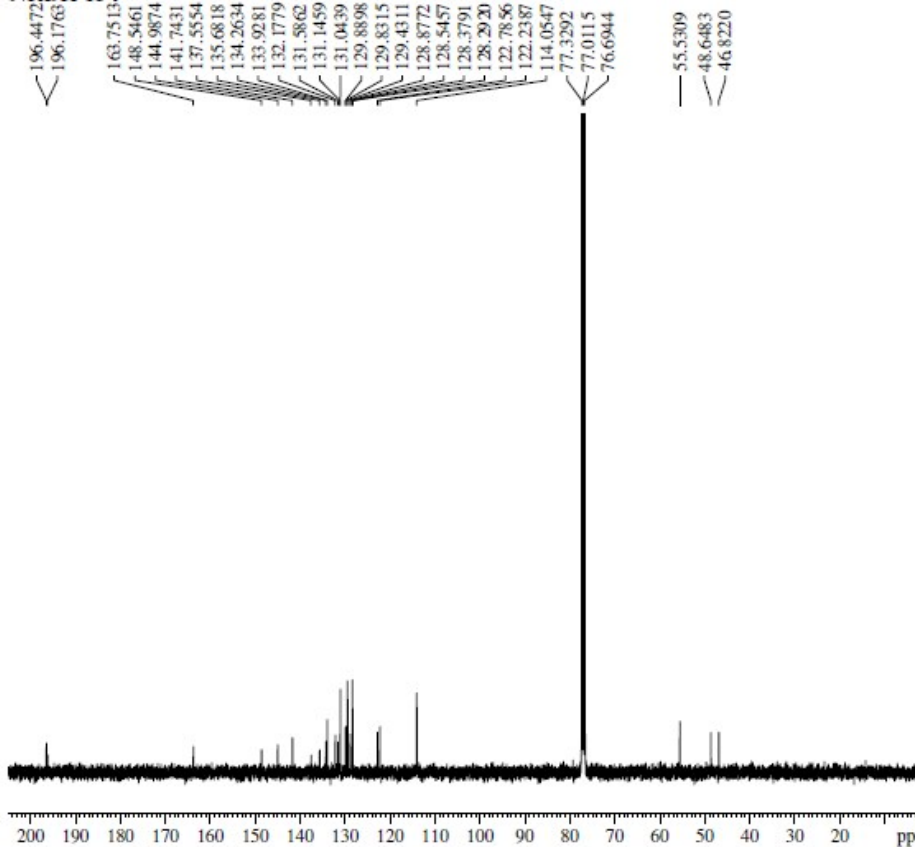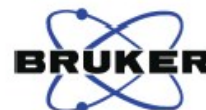

Current Data Parameters  
 NAME 30-Jun-FN-2017  
 EXPNO 310  
 PROCNO 1

F2 - Acquisition Parameters  
 Date\_ 20170630  
 Time 19.44  
 INSTRUM spect  
 PROBHD 5 mm PABBO BB/  
 PULPROG zgpg30  
 TD 65536  
 SOLVENT CDCl3  
 NS 512  
 DS 0  
 SWH 24038.461 Hz  
 FIDRES 0.366798 Hz  
 AQ 1.3631488 sec  
 RG 201.48  
 DW 20.800 usec  
 DE 6.50 usec  
 TE 301.0 K  
 D1 2.00000000 sec  
 D11 0.03000000 sec  
 TDO 1

==== CHANNEL f1 ====  
 SFO1 100.6304993 MHz  
 NUC1 13C  
 P1 9.90 usec  
 PLW1 53.00000000 W

==== CHANNEL f2 ====  
 SFO2 400.1621006 MHz  
 NUC2 1H  
 CPDPRG[2] waltz16  
 PCPD2 90.00 usec  
 PLW2 13.00000000 W  
 PLW12 0.27963999 W  
 PLW13 0.22651000 W

F2 - Processing parameters  
 SI 32768  
 SF 100.6204380 MHz  
 WDW EM  
 SSB 0  
 LB 1.00 Hz  
 GB 0  
 PC 1.40

Figure 36: <sup>13</sup>C NMR spectrum of 3l

NRBK-205

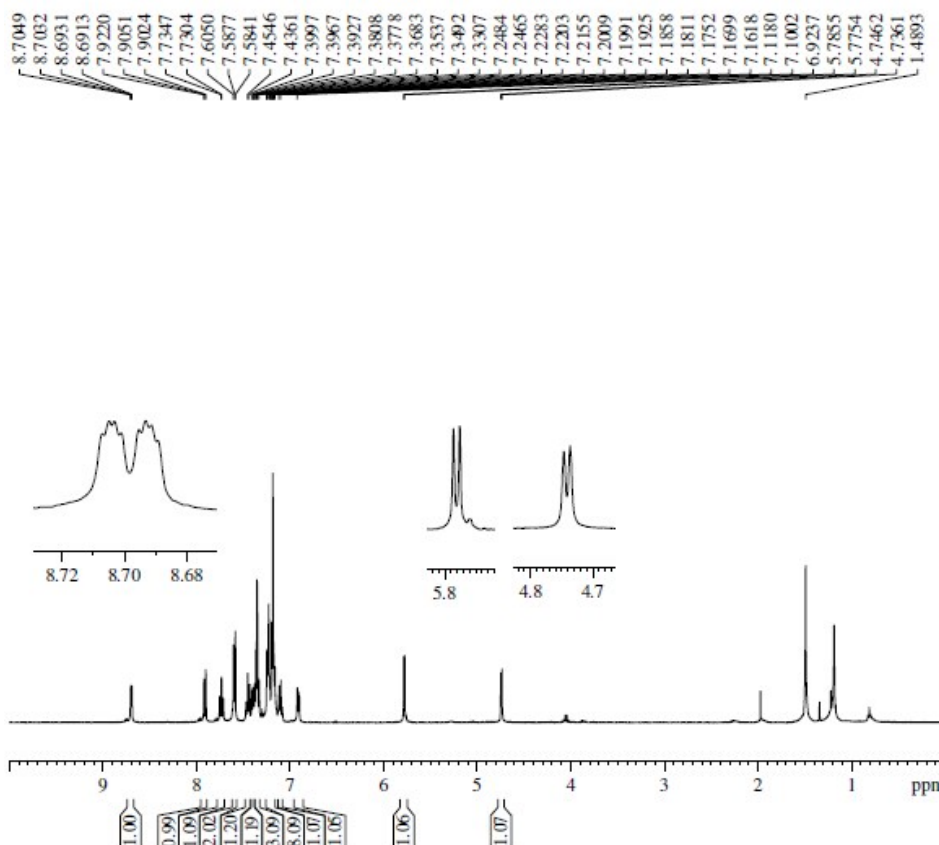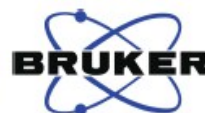

Current Data Parameters  
NAME 13-NOV-FN-2017  
EXPNO 350  
PROCNO 1

F2 - Acquisition Parameters  
Date\_ 20171113  
Time 16.29  
INSTRUM spect  
PROBHD 5 mm PABBO BB/  
PULPROG zg30  
TD 65536  
SOLVENT CDCl3  
NS 8  
DS 0  
SWH 9615.385 Hz  
FIDRES 0.146719 Hz  
AQ 3.4078720 sec  
RG 159.22  
DW 52.000 usec  
DE 6.50 usec  
TE 300.0 K  
D1 1.00000000 sec  
TDO 1

==== CHANNEL f1 ====  
SFO1 400.1629712 MHz  
NUC1 1H  
P1 13.20 usec  
PLW1 13.00000000 W

F2 - Processing parameters  
SI 65536  
SF 400.1605390 MHz  
WDW EM  
SSB 0  
LB 0.30 Hz  
GB 0  
PC 1.00

Figure 37: <sup>1</sup>H NMR spectrum of 3m

NRBK-205

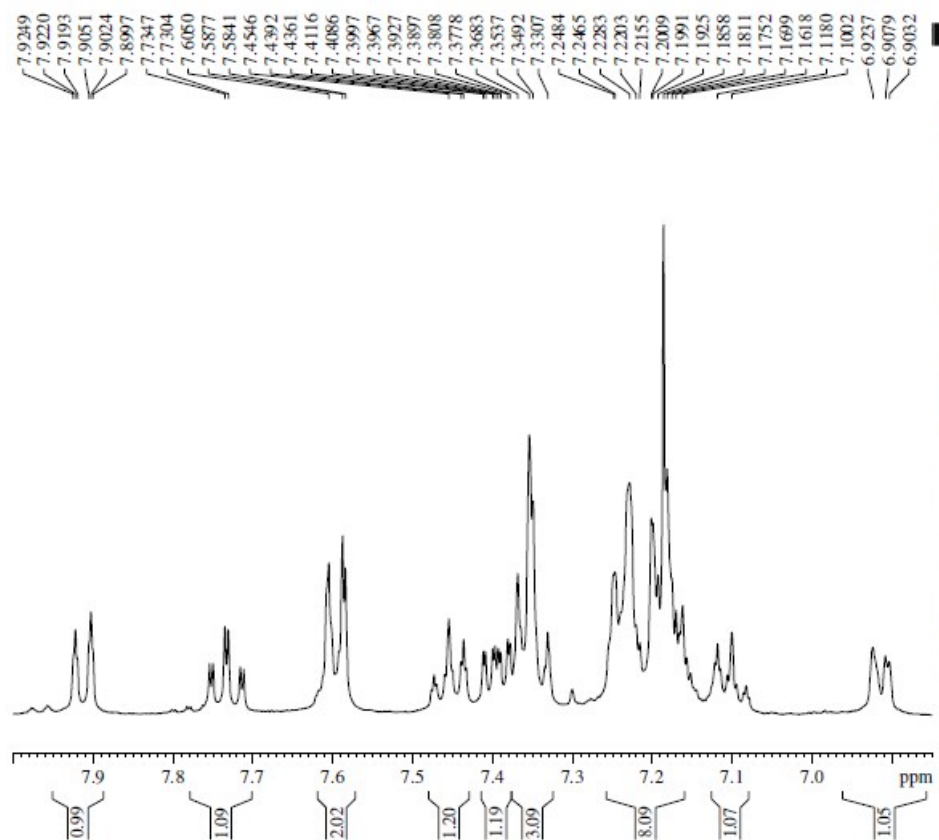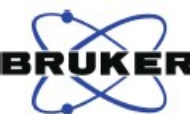

Current Data Parameters  
NAME 13-NOV-FN-2017  
EXPNO 350  
PROCNO 1

F2 - Acquisition Parameters  
Date\_ 20171113  
Time 16.29  
INSTRUM spect  
PROBHD 5 mm PABBO BB/  
PULPROG zg30  
TD 65536  
SOLVENT CDCl3  
NS 8  
DS 0  
SWH 9615.385 Hz  
FIDRES 0.146719 Hz  
AQ 3.4078720 sec  
RG 159.22  
DW 52.000 usec  
DE 6.50 usec  
TE 300.0 K  
D1 1.00000000 sec  
TDO 1

==== CHANNEL f1 ====  
SFO1 400.1629712 MHz  
NUC1 1H  
P1 13.20 usec  
PLW1 13.00000000 W

F2 - Processing parameters  
SI 65536  
SF 400.1605390 MHz  
WDW EM  
SSB 0  
LB 0.30 Hz  
GB 0  
PC 1.00

Figure 38: <sup>1</sup>H NMR spectrum of 3m (expansion)

NRBK-205

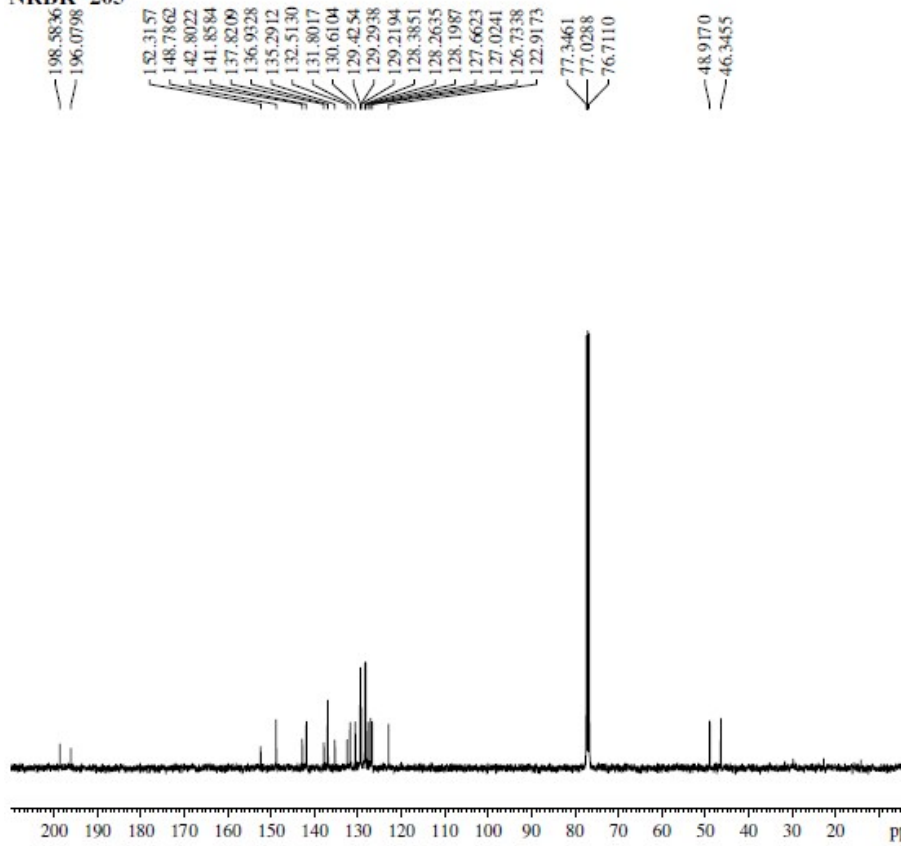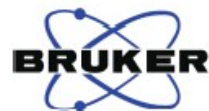

Current Data Parameters  
 NAME 05-Oct-FN-2017  
 EXPNO 310  
 PROCNO 1

F2 - Acquisition Parameters  
 Date\_ 20171005  
 Time 20.20  
 INSTRUM spect  
 PROBHD 5 mm PABBO BB/  
 PULPROG zgpg30  
 TD 65536  
 SOLVENT CDCl3  
 NS 512  
 DS 0  
 SWH 24038.461 Hz  
 FIDRES 0.366798 Hz  
 AQ 1.3631488 sec  
 RG 201.48  
 DW 20.800 usec  
 DE 6.50 usec  
 TE 300.0 K  
 D1 2.0000000 sec  
 D11 0.0300000 sec  
 TD0 1

==== CHANNEL f1 ====  
 SFO1 100.6304993 MHz  
 NUC1 13C  
 P1 9.90 usec  
 PLW1 53.0000000 W

==== CHANNEL f2 ====  
 SFO2 400.1621006 MHz  
 NUC2 1H  
 CPDPRG2 waltz16  
 PCPD2 90.00 usec  
 PLW12 13.0000000 W  
 PLW13 0.27963999 W  
 PLW13 0.22651000 W

F2 - Processing parameters  
 SI 32768  
 SF 100.6204380 MHz  
 WDW EM  
 SSB 0  
 LB 3.00 Hz  
 GB 0  
 PC 1.40

Figure 39: <sup>13</sup>C NMR spectrum of 3m

NRBK-194

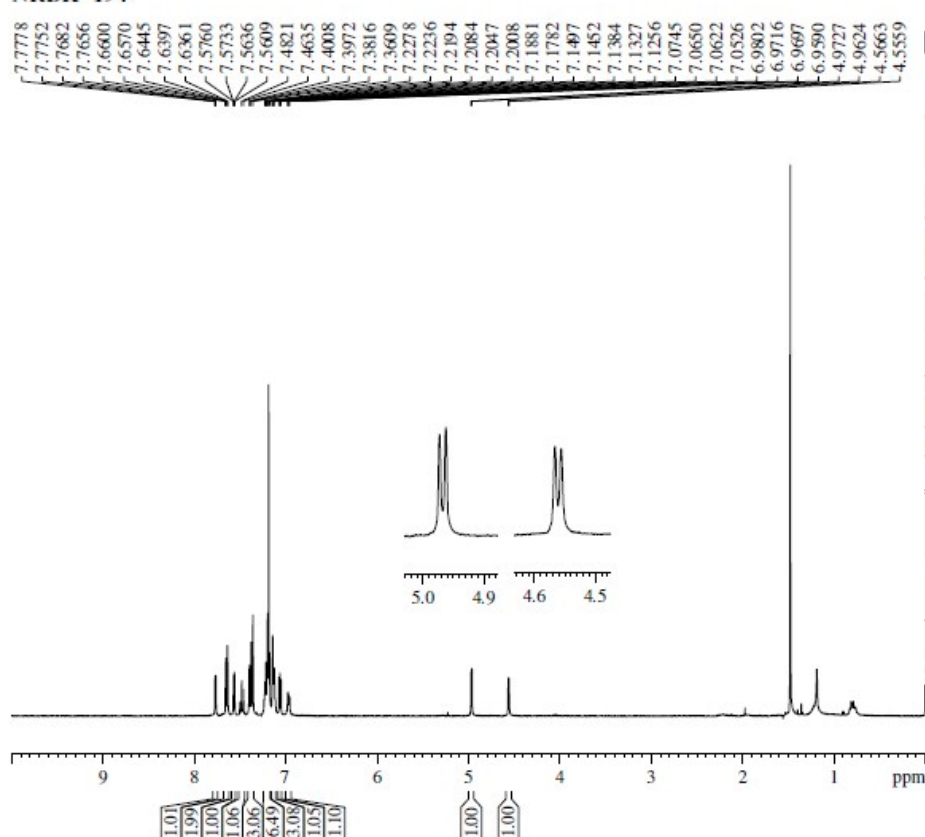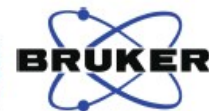

Current Data Parameters  
 NAME 16-NOV-FN-2017  
 EXPNO 320  
 PROCNO 1

F2 - Acquisition Parameters  
 Date\_ 20171116  
 Time 16.49  
 INSTRUM spect  
 PROBHD 5 mm PABBO BB/  
 PULPROG zg30  
 TD 65536  
 SOLVENT CDCl3  
 NS 8  
 DS 2  
 SWH 8012.820 Hz  
 FIDRES 0.122266 Hz  
 AQ 4.0894465 sec  
 RG 179.93  
 DW 62.400 usec  
 DE 6.50 usec  
 TE 300.0 K  
 D1 1.0000000 sec  
 TD0 1

==== CHANNEL f1 ====  
 SFO1 400.1629712 MHz  
 NUC1 1H  
 P1 13.20 usec  
 PLW1 13.0000000 W

F2 - Processing parameters  
 SI 65536  
 SF 400.1605382 MHz  
 WDW EM  
 SSB 0  
 LB 0.30 Hz  
 GB 0  
 PC 1.00

Figure 40: <sup>1</sup>H NMR spectrum of 3n

NRBK-194

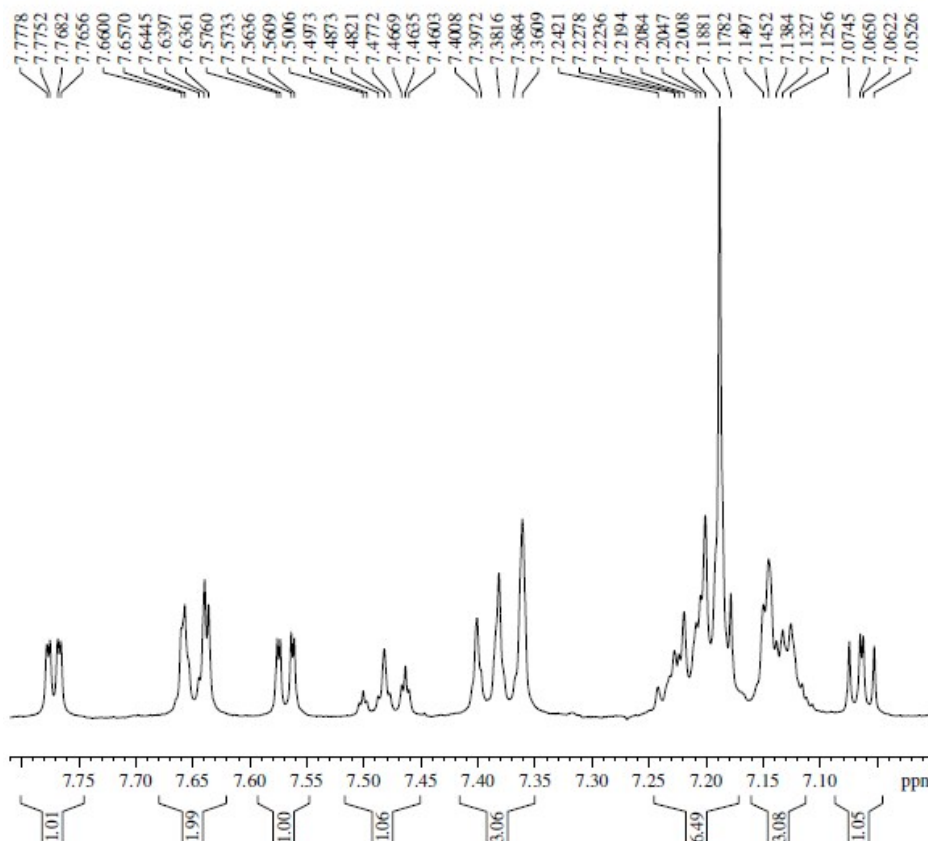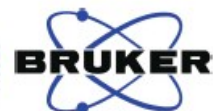

Current Data Parameters  
 NAME 16-NOV-FN-2017  
 EXPNO 320  
 PROCNO 1

F2 - Acquisition Parameters  
 Date\_ 20171116  
 Time 16.49  
 INSTRUM spect  
 PROBHD 5 mm PABBO BB/  
 PULPROG zg30  
 TD 65536  
 SOLVENT CDCl3  
 NS 8  
 DS 2  
 SWH 8012.820 Hz  
 FIDRES 0.122266 Hz  
 AQ 4.0894465 sec  
 RG 179.93  
 DW 62.400 usec  
 DE 6.50 usec  
 TE 300.0 K  
 D1 1.00000000 sec  
 TDO 1

==== CHANNEL f1 ====  
 SFO1 400.1629712 MHz  
 NUC1 1H  
 P1 13.20 usec  
 PLW1 13.00000000 W

F2 - Processing parameters  
 SI 65536  
 SF 400.1605382 MHz  
 WDW EM  
 SSB 0  
 LB 0.30 Hz  
 GB 0  
 PC 1.00

Figure 41: <sup>1</sup>H NMR spectrum of 3n (expansion)

NRBK-194

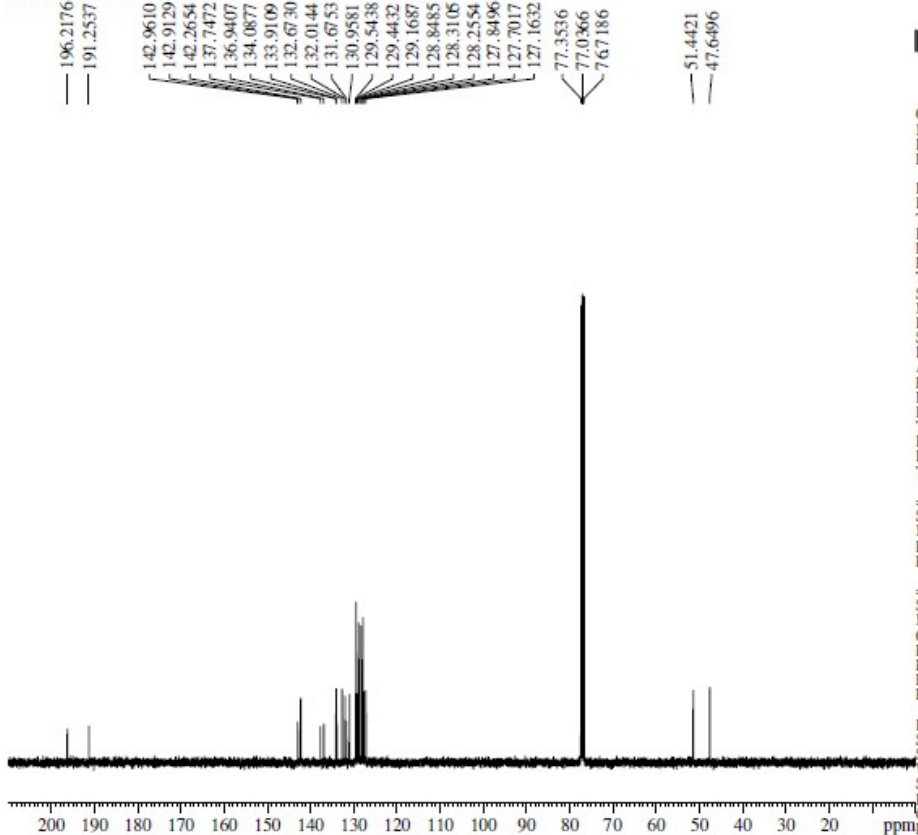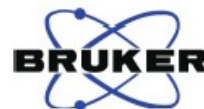

Current Data Parameters  
 NAME 22-Aug-FN-2017  
 EXPNO 370  
 PROCNO 1

F2 - Acquisition Parameters  
 Date\_ 20170822  
 Time 15.02  
 INSTRUM spect  
 PROBHD 5 mm PABBO BB/  
 PULPROG zgpg30  
 TD 65536  
 SOLVENT CDCl3  
 NS 512  
 DS 0  
 SWH 24038.461 Hz  
 FIDRES 0.366798 Hz  
 AQ 1.3631488 sec  
 RG 201.48  
 DW 20.800 usec  
 DE 6.50 usec  
 TE 300.0 K  
 D1 2.00000000 sec  
 D11 0.03000000 sec  
 TDO 1

==== CHANNEL f1 ====  
 SFO1 100.6304993 MHz  
 NUC1 13C  
 P1 9.90 usec  
 PLW1 53.00000000 W

==== CHANNEL f2 ====  
 SFO2 400.1621006 MHz  
 NUC2 1H  
 CPDPRG[2] waltz16  
 PCPD2 90.00 usec  
 PLW2 13.00000000 W  
 PLW12 0.27963999 W  
 PLW13 0.22651000 W

F2 - Processing parameters  
 SI 32768  
 SF 100.6204380 MHz  
 WDW EM  
 SSB 0  
 LB 1.00 Hz  
 GB 0  
 PC 1.40

Figure 42: <sup>13</sup>C NMR spectrum of 3n

NRBK-193

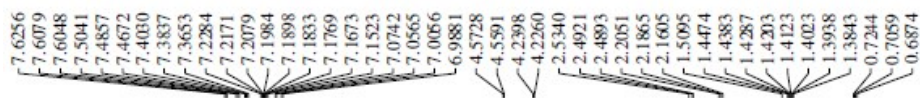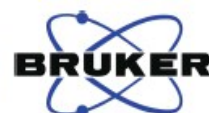

Current Data Parameters  
NAME 21-Aug-FN-2017  
EXPNO 440  
PROCNO 1

F2 - Acquisition Parameters  
Date\_ 20170821  
Time 15.42  
INSTRUM spect  
PROBHD 5 mm PABBO BB/  
PULPROG zg30  
TD 65536  
SOLVENT CDCl3  
NS 8  
DS 0  
SWH 9615.385 Hz  
FIDRES 0.146719 Hz  
AQ 3.4078720 sec  
RG 114.26  
DW 52.000 usec  
DE 6.50 usec  
TE 300.0 K  
D1 1.00000000 sec  
TD0 1

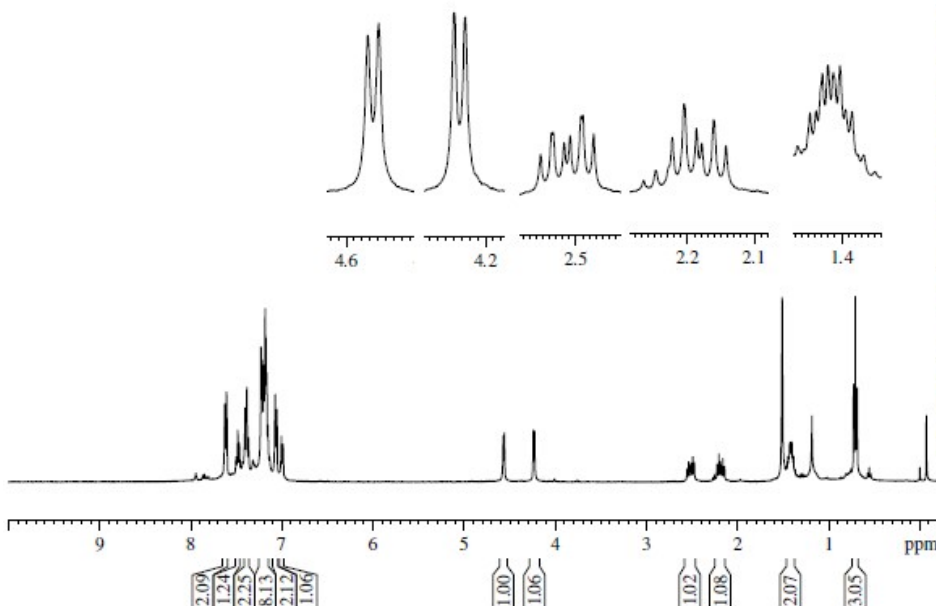

==== CHANNEL f1 ====  
SFO1 400.162912 MHz  
NUC1 1H  
P1 13.20 usec  
PLW1 13.00000000 W  
F2 - Processing parameters  
SI 65536  
SF 400.1605409 MHz  
WDW EM  
SSB 0  
LB 0.30 Hz  
GB 0  
PC 1.00

Figure 43: <sup>1</sup>H NMR spectrum of 3o

NRBK-193

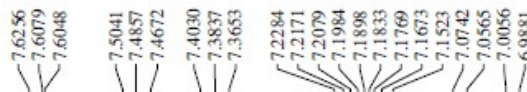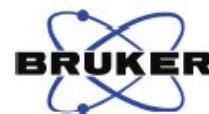

Current Data Parameters  
NAME 21-Aug-FN-2017  
EXPNO 440  
PROCNO 1

F2 - Acquisition Parameters  
Date\_ 20170821  
Time 15.42  
INSTRUM spect  
PROBHD 5 mm PABBO BB/  
PULPROG zg30  
TD 65536  
SOLVENT CDCl3  
NS 8  
DS 0  
SWH 9615.385 Hz  
FIDRES 0.146719 Hz  
AQ 3.4078720 sec  
RG 114.26  
DW 52.000 usec  
DE 6.50 usec  
TE 300.0 K  
D1 1.00000000 sec  
TD0 1

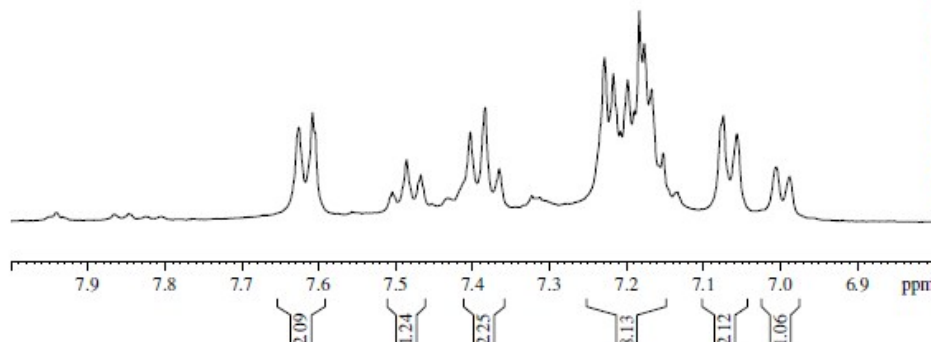

==== CHANNEL f1 ====  
SFO1 400.162912 MHz  
NUC1 1H  
P1 13.20 usec  
PLW1 13.00000000 W  
F2 - Processing parameters  
SI 65536  
SF 400.1605409 MHz  
WDW EM  
SSB 0  
LB 0.30 Hz  
GB 0  
PC 1.00

Figure 44: <sup>1</sup>H NMR spectrum of 3o (expansion)

NR-BK-193

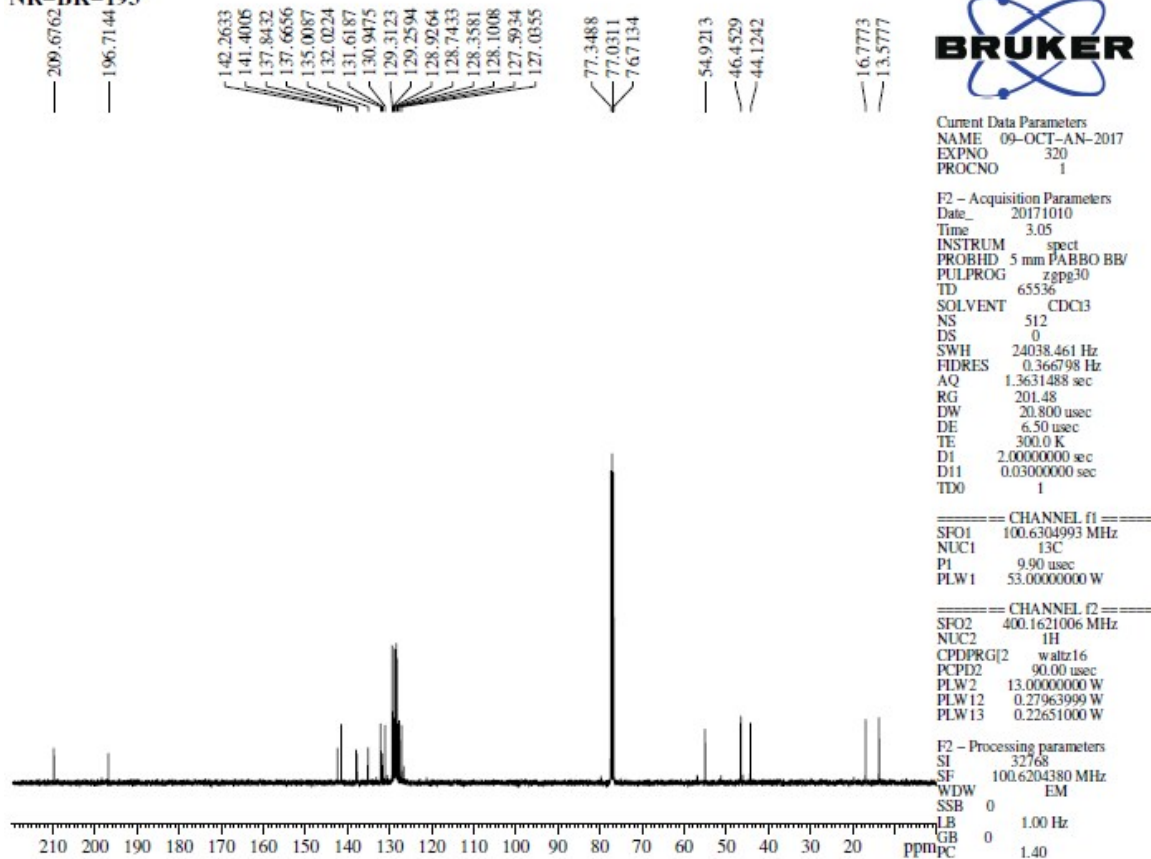

Figure 45: <sup>13</sup>C NMR spectrum of 3o

NRBK-189

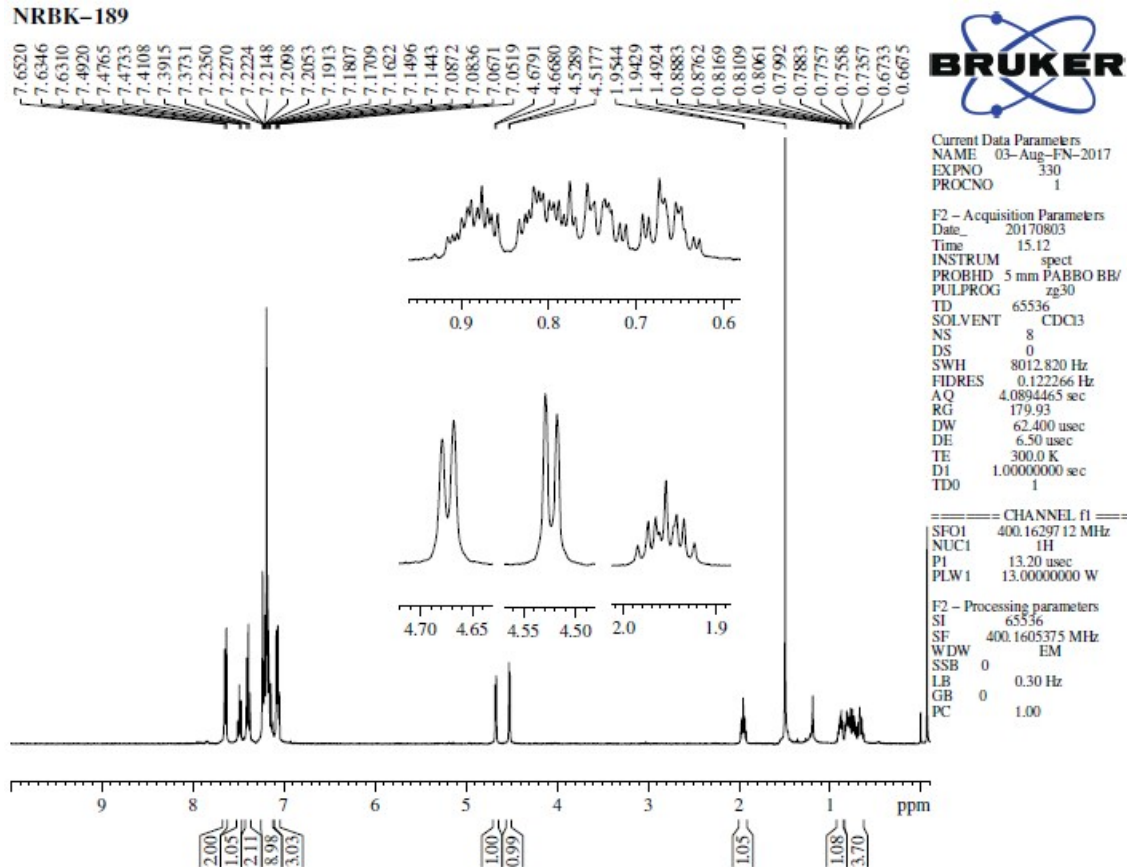

Figure 46: <sup>1</sup>H NMR spectrum of 3p



NRBK-189

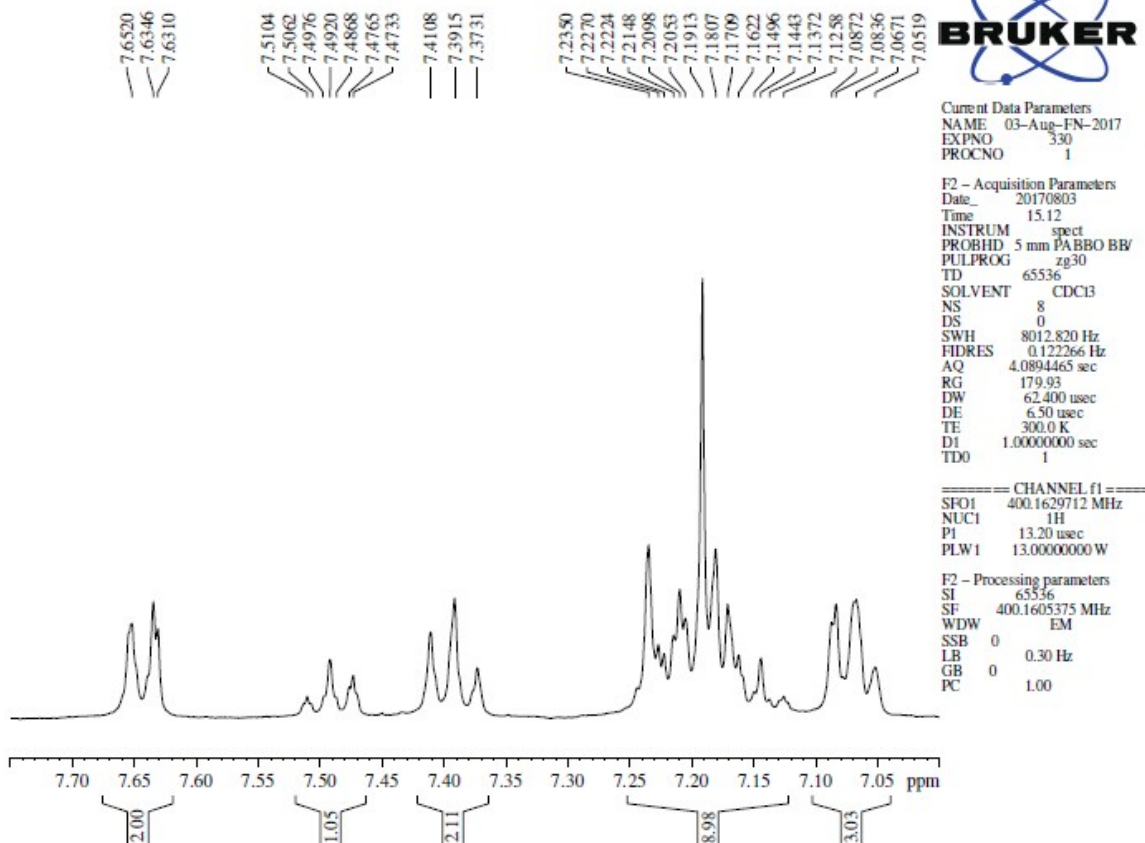

Figure 47: <sup>1</sup>H NMR spectrum of 3p (expansion)

NRBK-189

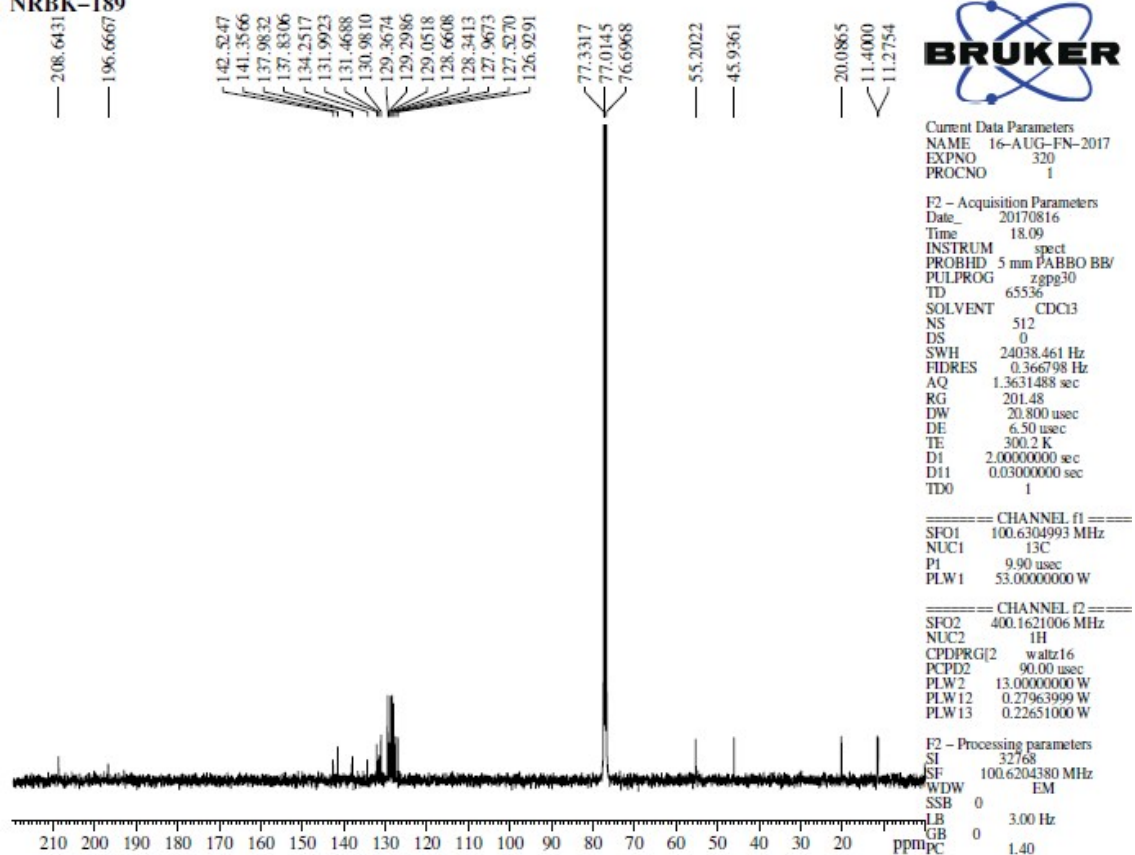

Figure 48: <sup>13</sup>C NMR spectrum of 3p

NRBK-218

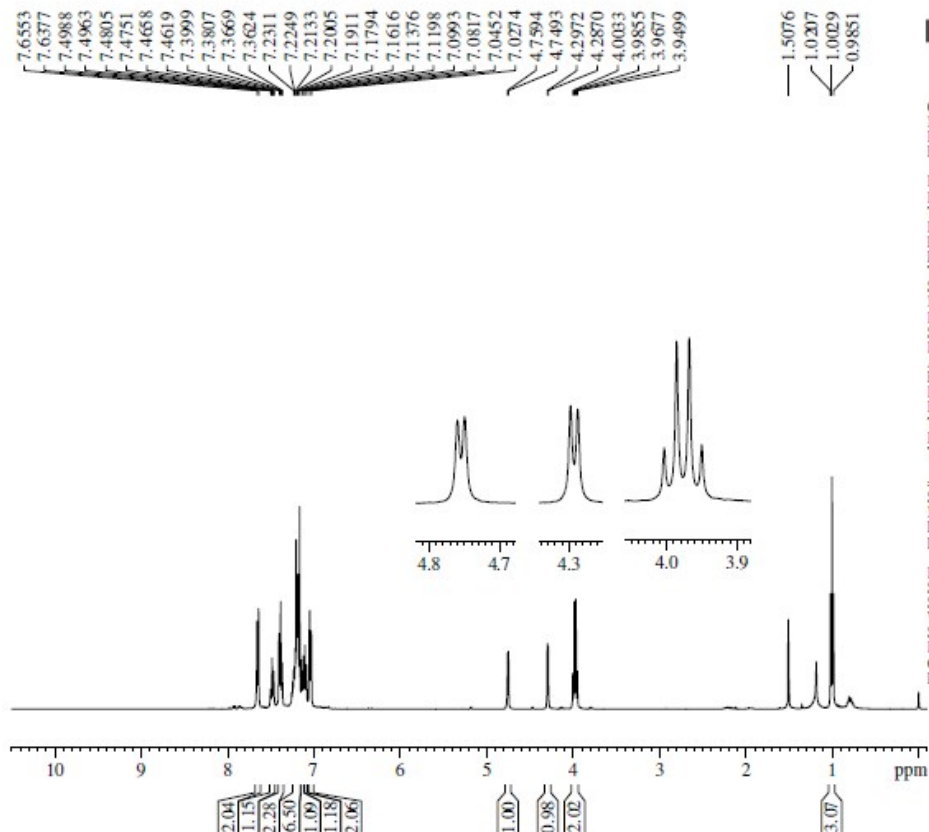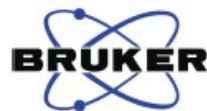

Current Data Parameters  
 NAME 06-OCT-AN-2017  
 EXPNO 320  
 PROCNO 1

F2 - Acquisition Parameters  
 Date\_ 20171006  
 Time 20.46  
 INSTRUM spect  
 PROBHD 5 mm PABBO BB/  
 PULPROG zg30  
 TD 65536  
 SOLVENT CDCl3  
 NS 8  
 DS 0  
 SWH 9615.385 Hz  
 FIDRES 0.146719 Hz  
 AQ 3.4078720 sec  
 RG 100.41  
 DW 52.000 usec  
 DE 6.50 usec  
 TE 300.0 K  
 D1 1.00000000 sec  
 TDO 1

==== CHANNEL f1 ====  
 SFO1 400.1629712 MHz  
 NUC1 1H  
 P1 13.20 usec  
 PLW1 13.00000000 W

F2 - Processing parameters  
 SI 65536  
 SF 400.1605419 MHz  
 WDW EM  
 SSB 0  
 LB 0.30 Hz  
 GB 0  
 PC 1.00

Figure 49: <sup>1</sup>H NMR spectrum of 3q

NRBK-218

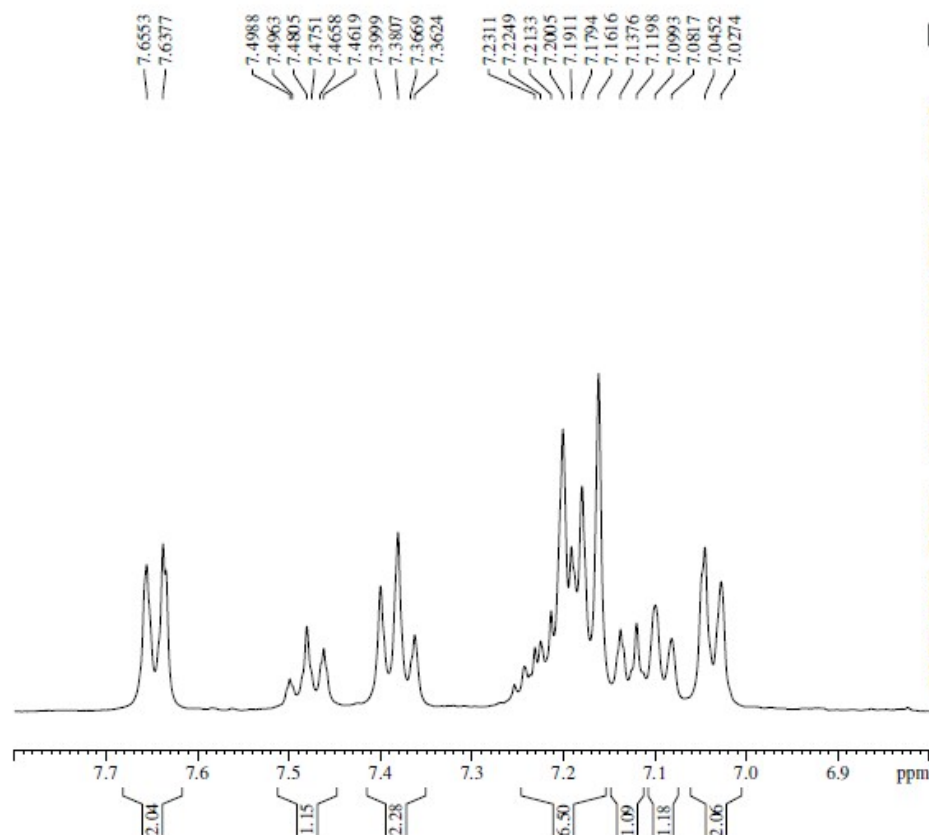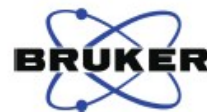

Current Data Parameters  
 NAME 06-OCT-AN-2017  
 EXPNO 320  
 PROCNO 1

F2 - Acquisition Parameters  
 Date\_ 20171006  
 Time 20.46  
 INSTRUM spect  
 PROBHD 5 mm PABBO BB/  
 PULPROG zg30  
 TD 65536  
 SOLVENT CDCl3  
 NS 8  
 DS 0  
 SWH 9615.385 Hz  
 FIDRES 0.146719 Hz  
 AQ 3.4078720 sec  
 RG 100.41  
 DW 52.000 usec  
 DE 6.50 usec  
 TE 300.0 K  
 D1 1.00000000 sec  
 TDO 1

==== CHANNEL f1 ====  
 SFO1 400.1629712 MHz  
 NUC1 1H  
 P1 13.20 usec  
 PLW1 13.00000000 W

F2 - Processing parameters  
 SI 65536  
 SF 400.1605419 MHz  
 WDW EM  
 SSB 0  
 LB 0.30 Hz  
 GB 0  
 PC 1.00

Figure 50: <sup>1</sup>H NMR spectrum of 3q (expansion)

NRBK-218

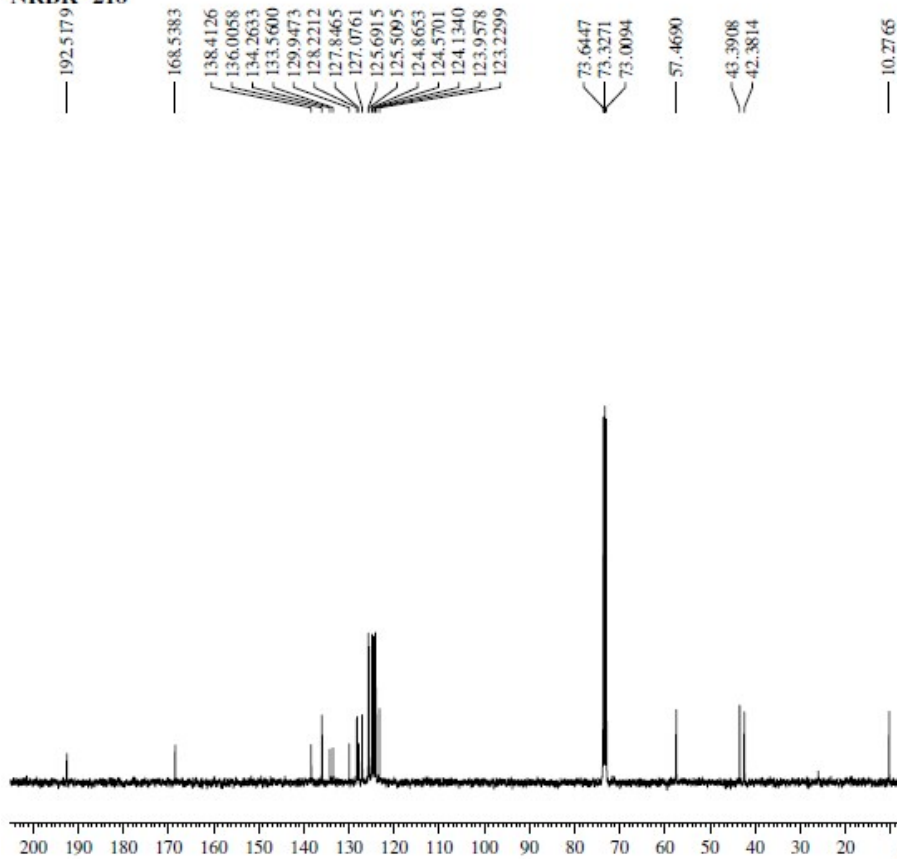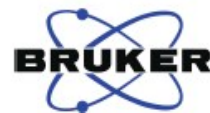

Current Data Parameters  
 NAME 09-OCT-FN-2017  
 EXPNO 340  
 PROCNO 1

F2 - Acquisition Parameters  
 Date\_ 20171009  
 Time 20.36  
 INSTRUM spect  
 PROBHD 5 mm PABBO BB/  
 PULPROG zgpg30  
 TD 65536  
 SOLVENT Dioxane  
 NS 512  
 DS 0  
 SWH 24038.461 Hz  
 FIDRES 0.366798 Hz  
 AQ 1.3631488 sec  
 RG 201.48  
 DW 20.800 usec  
 DE 6.50 usec  
 TE 300.0 K  
 D1 2.00000000 sec  
 D11 0.03000000 sec  
 TDO 1

==== CHANNEL f1 ====  
 SFO1 100.6304993 MHz  
 NUC1 13C  
 P1 9.90 usec  
 PLW1 53.00000000 W

==== CHANNEL f2 ====  
 SFO2 400.1621006 MHz  
 NUC2 1H  
 CPDPRG2 waltz16  
 PCPD2 90.00 usec  
 PLW2 13.00000000 W  
 PLW12 0.27963999 W  
 PLW13 0.22651000 W

F2 - Processing parameters  
 SI 32768  
 SF 100.6204380 MHz  
 WDW EM  
 SSB 0  
 LB 3.00 Hz  
 GB 0  
 PC 1.40

Figure 51: <sup>13</sup>C NMR spectrum of 3q

NRBK-162

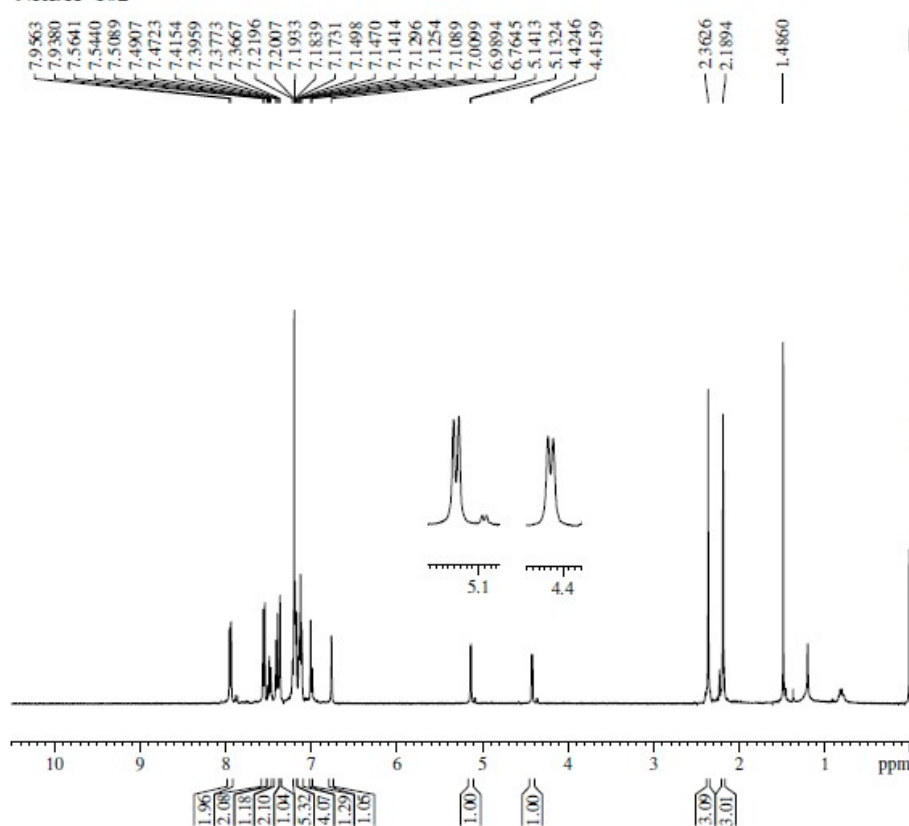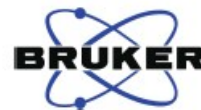

Current Data Parameters  
 NAME 10-JULY-FN-2017  
 EXPNO 370  
 PROCNO 1

F2 - Acquisition Parameters  
 Date\_ 20170710  
 Time 14.41  
 INSTRUM spect  
 PROBHD 5 mm PABBO BB/  
 PULPROG zg30  
 TD 65536  
 SOLVENT CDCl3  
 NS 8  
 DS 0  
 SWH 9615.385 Hz  
 FIDRES 0.146719 Hz  
 AQ 3.4078720 sec  
 RG 159.22  
 DW 52.000 usec  
 DE 6.50 usec  
 TE 300.0 K  
 D1 1.00000000 sec  
 TDO 1

==== CHANNEL f1 ====  
 SFO1 400.1629712 MHz  
 NUC1 1H  
 P1 13.20 usec  
 PLW1 13.00000000 W

F2 - Processing parameters  
 SI 65536  
 SF 400.1605340 MHz  
 WDW EM  
 SSB 0  
 LB 0.30 Hz  
 GB 0  
 PC 1.00

Figure 52: <sup>1</sup>H NMR spectrum of 3r

NRBK-162

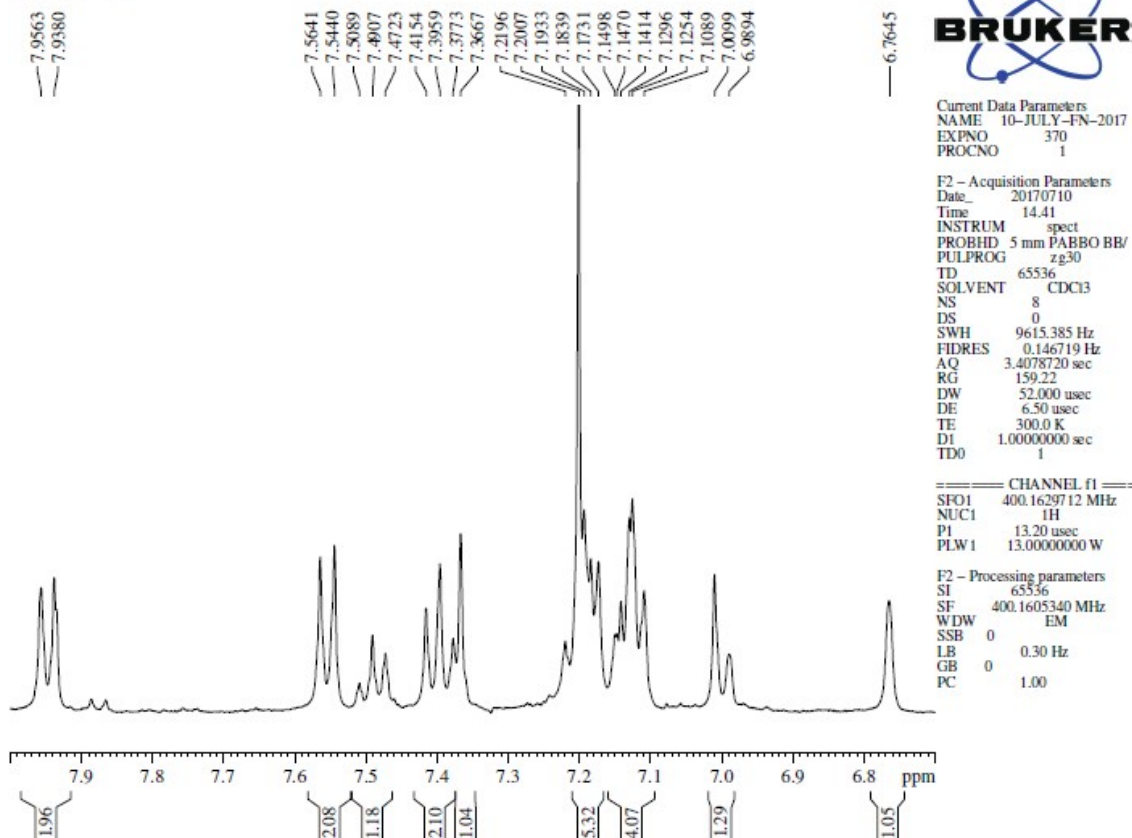

Figure 53: <sup>1</sup>H NMR spectrum of 3r (with expansion)

NRBK 162

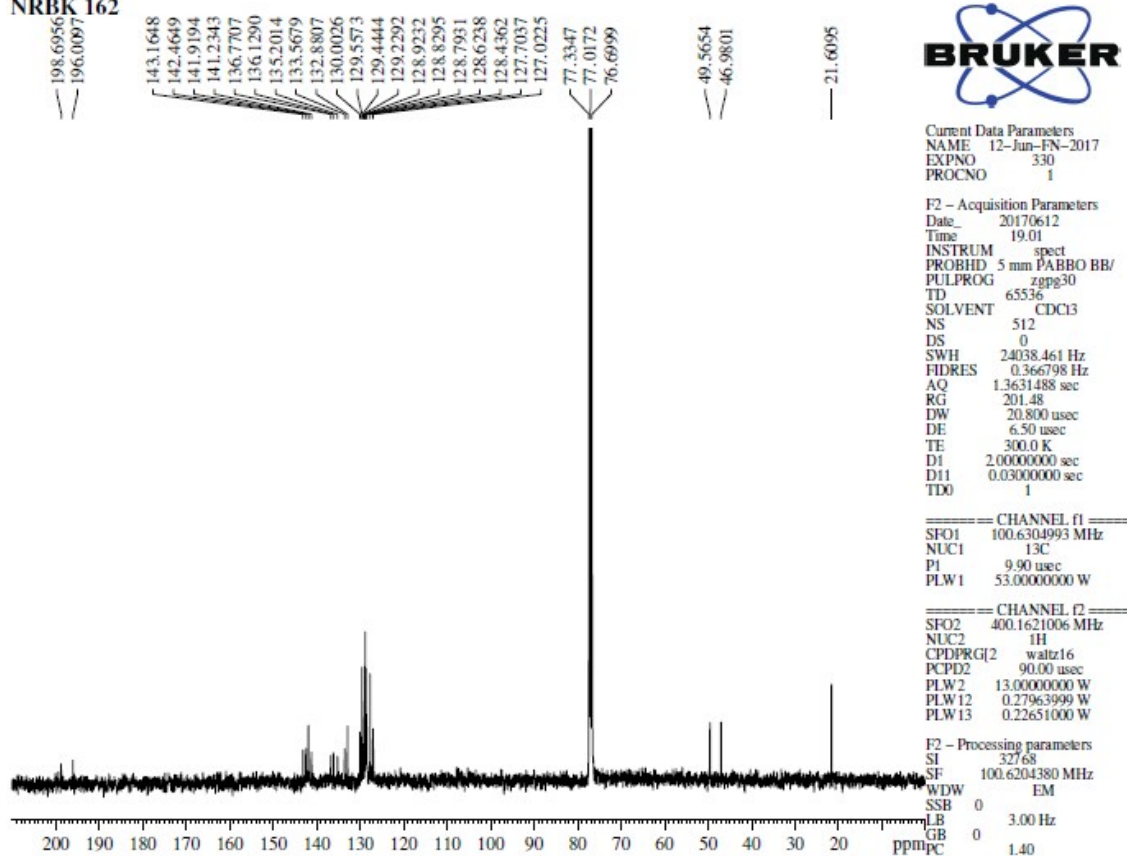

Figure 54: <sup>13</sup>C NMR spectrum of 3r

NRBK-149

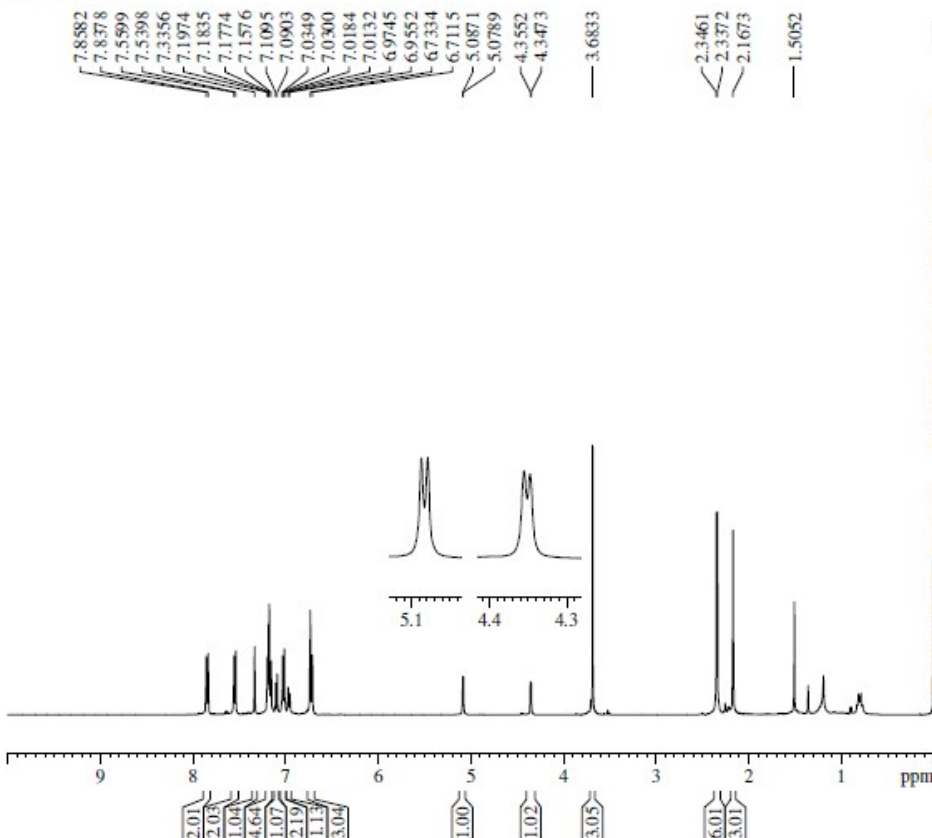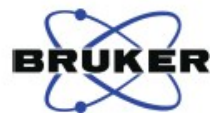

Current Data Parameters  
 NAME 10-JULY-FN-2017  
 EXPNO 360  
 PROCNO 1

F2 - Acquisition Parameters  
 Date\_ 20170710  
 Time 14.37  
 INSTRUM spect  
 PROBHD 5 mm PABBO BB/  
 PULPROG zg30  
 TD 65536  
 SOLVENT CDCl3  
 NS 8  
 DS 0  
 SWH 9615.385 Hz  
 FIDRES 0.146719 Hz  
 AQ 3.4078720 sec  
 RG 100.41  
 DW 52.000 usec  
 DE 6.50 usec  
 TE 300.0 K  
 D1 1.00000000 sec  
 TDO 1

==== CHANNEL f1 ====  
 SFO1 400.1629712 MHz  
 NUC1 1H  
 P1 13.20 usec  
 PLW1 13.00000000 W  
 F2 - Processing parameters  
 SI 65536  
 SF 400.1605407 MHz  
 WDW EM  
 SSB 0  
 LB 0.30 Hz  
 GB 0  
 PC 1.00

Figure 55: <sup>1</sup>H NMR spectrum of 3s

NRBK-149

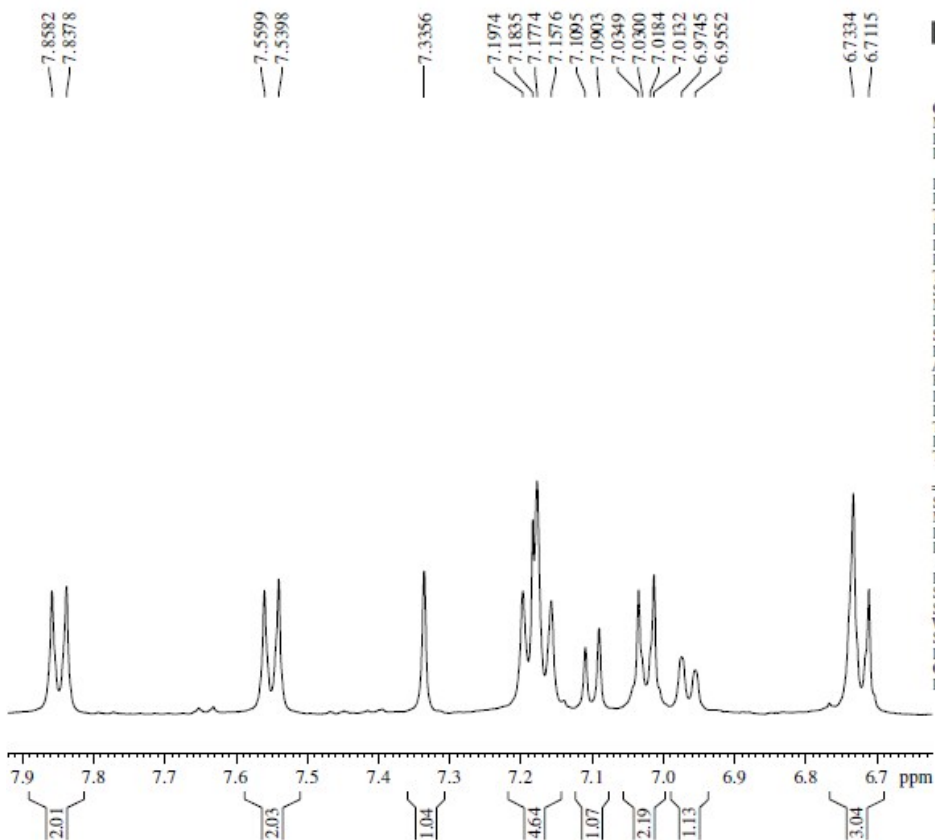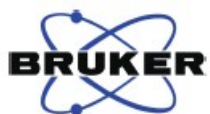

Current Data Parameters  
 NAME 10-JULY-FN-2017  
 EXPNO 360  
 PROCNO 1

F2 - Acquisition Parameters  
 Date\_ 20170710  
 Time 14.37  
 INSTRUM spect  
 PROBHD 5 mm PABBO BB/  
 PULPROG zg30  
 TD 65536  
 SOLVENT CDCl3  
 NS 8  
 DS 0  
 SWH 9615.385 Hz  
 FIDRES 0.146719 Hz  
 AQ 3.4078720 sec  
 RG 100.41  
 DW 52.000 usec  
 DE 6.50 usec  
 TE 300.0 K  
 D1 1.00000000 sec  
 TDO 1

==== CHANNEL f1 ====  
 SFO1 400.1629712 MHz  
 NUC1 1H  
 P1 13.20 usec  
 PLW1 13.00000000 W  
 F2 - Processing parameters  
 SI 65536  
 SF 400.1605407 MHz  
 WDW EM  
 SSB 0  
 LB 0.30 Hz  
 GB 0  
 PC 1.00

Figure 56: <sup>1</sup>H NMR spectrum of 3s (expansion)

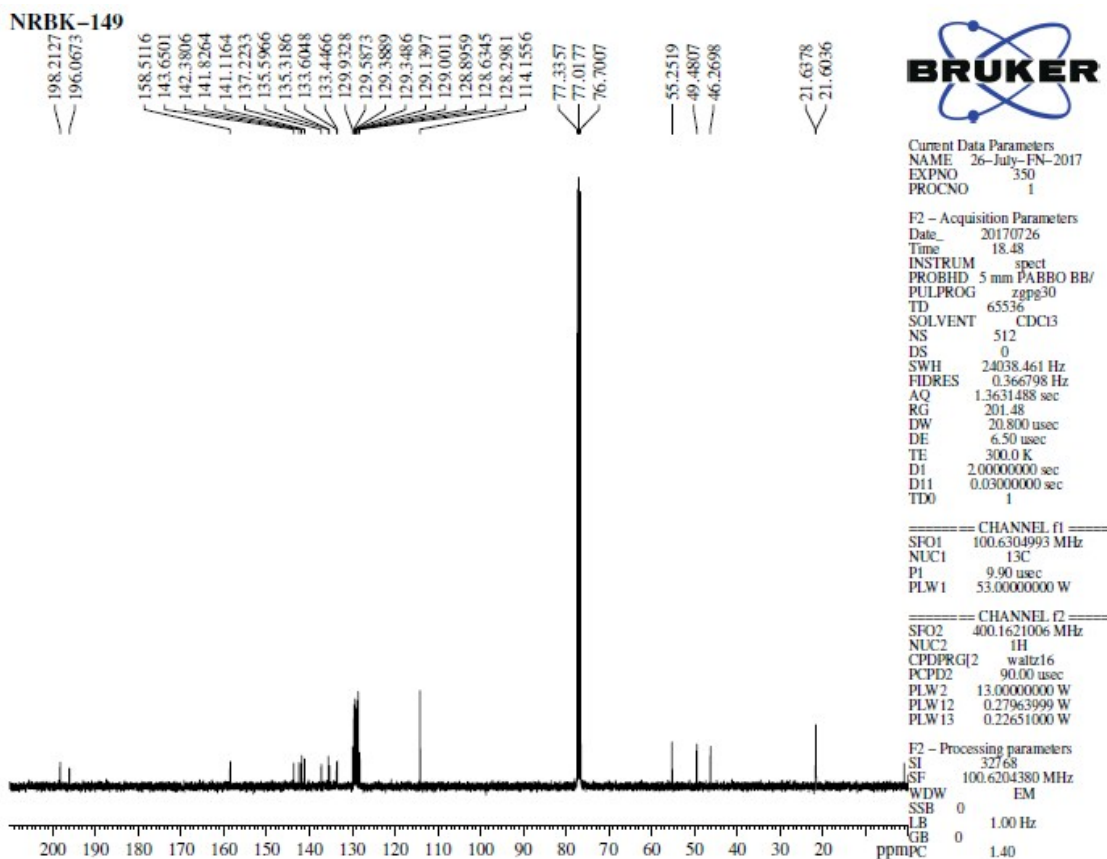

Figure 57: <sup>13</sup>C NMR spectrum of 3s

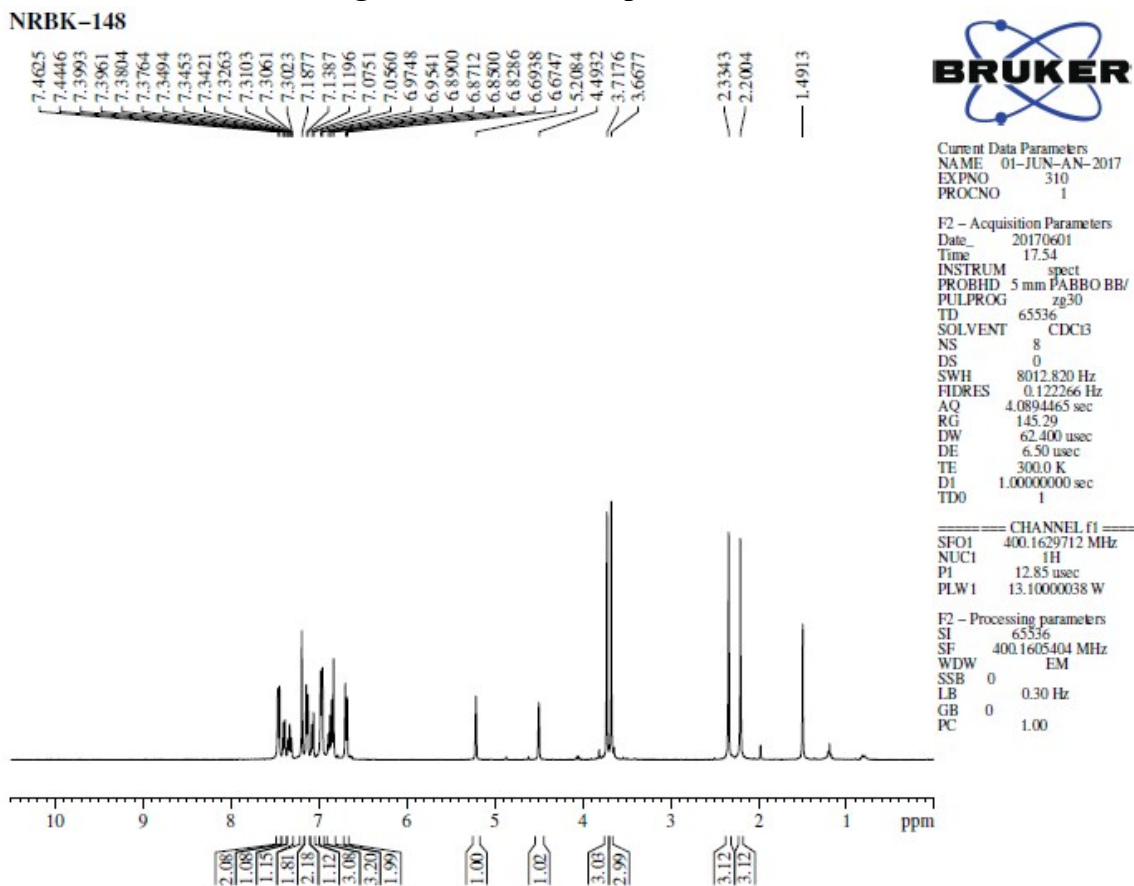

Figure 58: <sup>1</sup>H NMR spectrum of 3t

NRBK-148

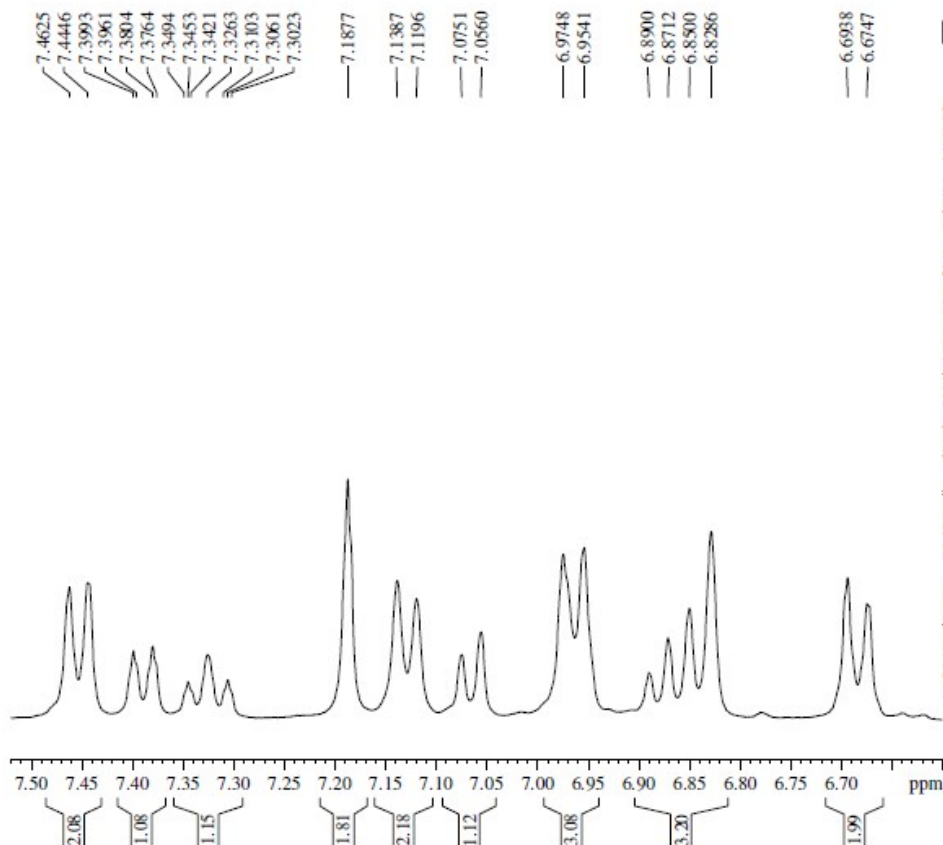

Figure 59: <sup>1</sup>H NMR spectrum of 3t (expansion)

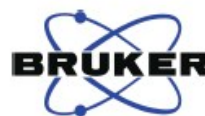

Current Data Parameters  
NAME 01-JUN-AN-2017  
EXPNO 310  
PROCNO 1

F2 - Acquisition Parameters  
Date\_ 20170601  
Time 17.54  
INSTRUM spect  
PROBHD 5 mm PABBO BB/  
PULPROG zg30  
TD 65536  
SOLVENT CDCl3  
NS 8  
DS 0  
SWH 8012.820 Hz  
FIDRES 0.122266 Hz  
AQ 4.0894465 sec  
RG 145.29  
DW 62.400 usec  
DE 6.50 usec  
TE 300.0 K  
D1 1.00000000 sec  
TD0 1

==== CHANNEL f1 ====  
SFO1 400.1629712 MHz  
NUC1 1H  
P1 12.85 usec  
PLW1 13.10000038 W

F2 - Processing parameters  
SI 65536  
SF 400.1605404 MHz  
WDW EM  
SSB 0  
LB 0.30 Hz  
GB 0  
PC 1.00

NRBK-148

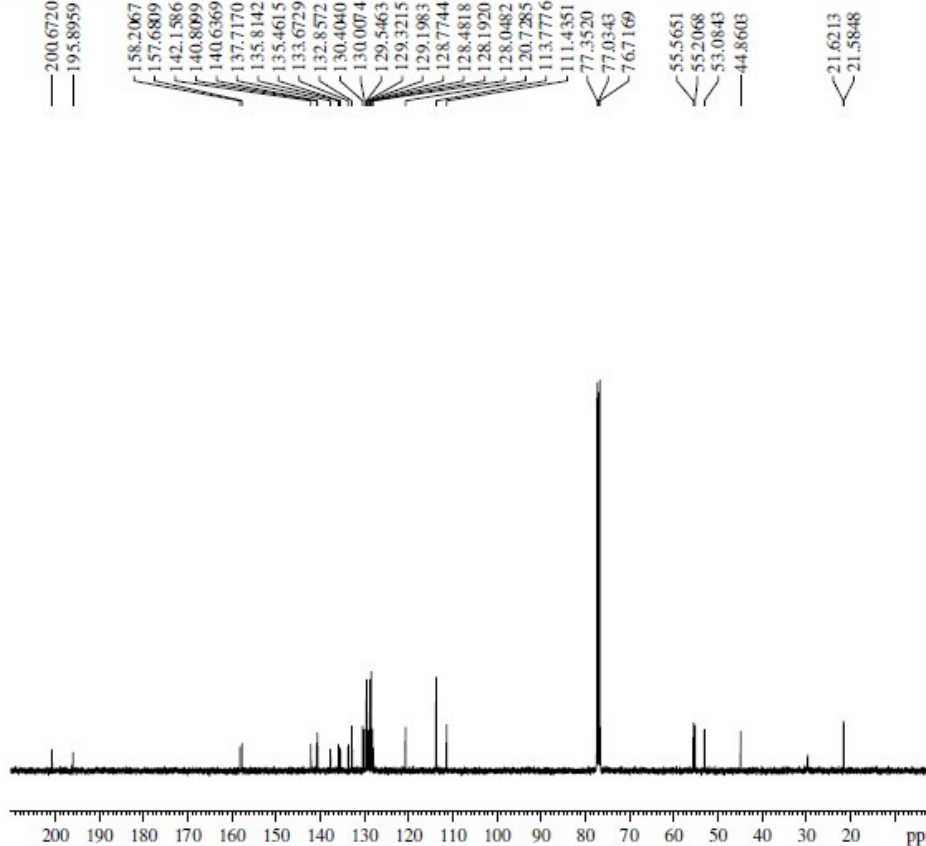

Figure 60: <sup>13</sup>C NMR spectrum of 3t

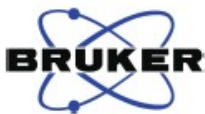

Current Data Parameters  
NAME 29-MAY-AN-2017  
EXPNO 340  
PROCNO 1

F2 - Acquisition Parameters  
Date\_ 20170529  
Time 22.50  
INSTRUM spect  
PROBHD 5 mm PABBO BB/  
PULPROG zgpg30  
TD 65536  
SOLVENT CDCl3  
NS 512  
DS 0  
SWH 24038.461 Hz  
FIDRES 0.366798 Hz  
AQ 1.3631488 sec  
RG 201.48  
DW 20.800 usec  
DE 6.50 usec  
TE 300.0 K  
D1 2.00000000 sec  
D11 0.03000000 sec  
TD0 1

==== CHANNEL f1 ====  
SFO1 100.6304993 MHz  
NUC1 13C  
P1 9.00 usec  
PLW1 61.09999847 W

==== CHANNEL f2 ====  
SFO2 400.1621006 MHz  
NUC2 1H  
CPDPRG[2] waltz16  
PCPD2 90.00 usec  
PLW2 13.10000038 W  
PLW12 0.26705000 W  
PLW13 0.21630999 W

F2 - Processing parameters  
SI 32768  
SF 100.6204380 MHz  
WDW EM  
SSB 0  
LB 1.00 Hz  
GB 0  
PC 1.40

NRBK 146

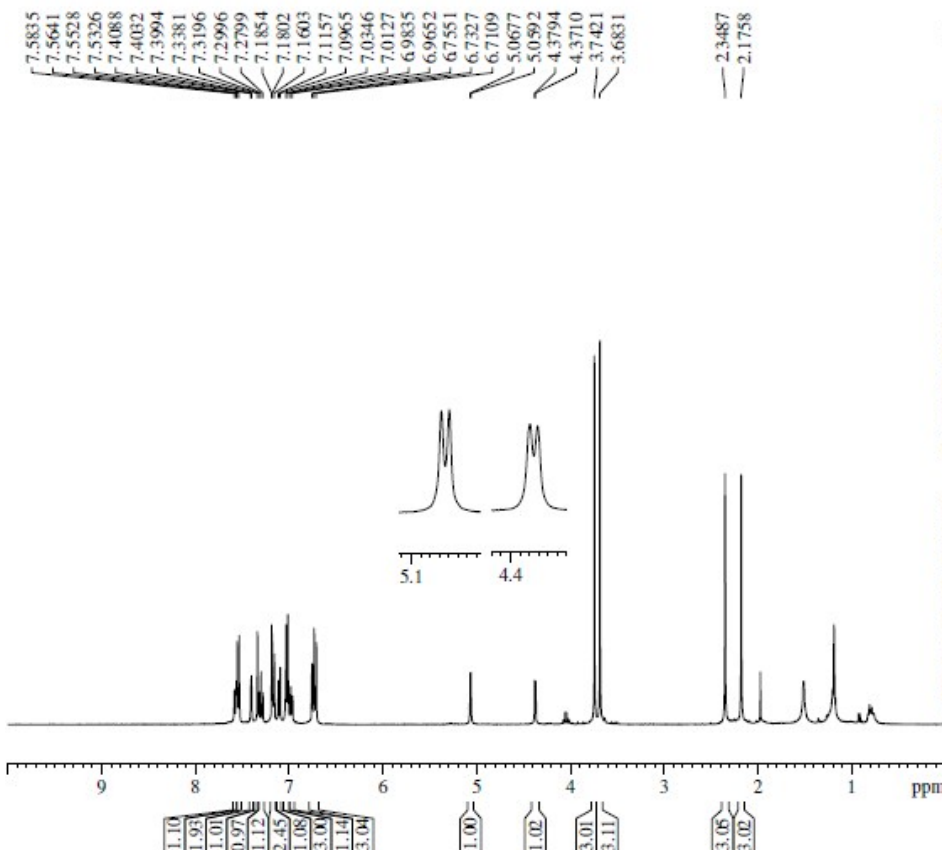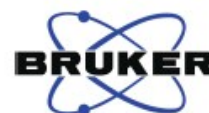

Current Data Parameters  
 NAME 22-MAY-FN-2017  
 EXPNO 370  
 PROCNO 1

F2 - Acquisition Parameters  
 Date\_ 20170522  
 Time 15.16  
 INSTRUM spect  
 PROBHD 5 mm PABBO BB/  
 PULPROG zg30  
 TD 65536  
 SOLVENT CDCl3  
 NS 8  
 DS 0  
 SWH 9615.385 Hz  
 FIDRES 0.146719 Hz  
 AQ 3.4078720 sec  
 RG 114.26  
 DW 52.000 usec  
 DE 6.50 usec  
 TE 297.3 K  
 D1 1.00000000 sec  
 TDO 1

==== CHANNEL f1 ====  
 SFO1 400.1629712 MHz  
 NUC1 1H  
 P1 13.20 usec  
 PLW1 13.00000000 W

F2 - Processing parameters  
 SI 65536  
 SF 400.1605401 MHz  
 WDW EM  
 SSB 0  
 LB 0.30 Hz  
 GB 0  
 PC 1.00

Figure 61: <sup>1</sup>H NMR spectrum of 3u

NRBK 146

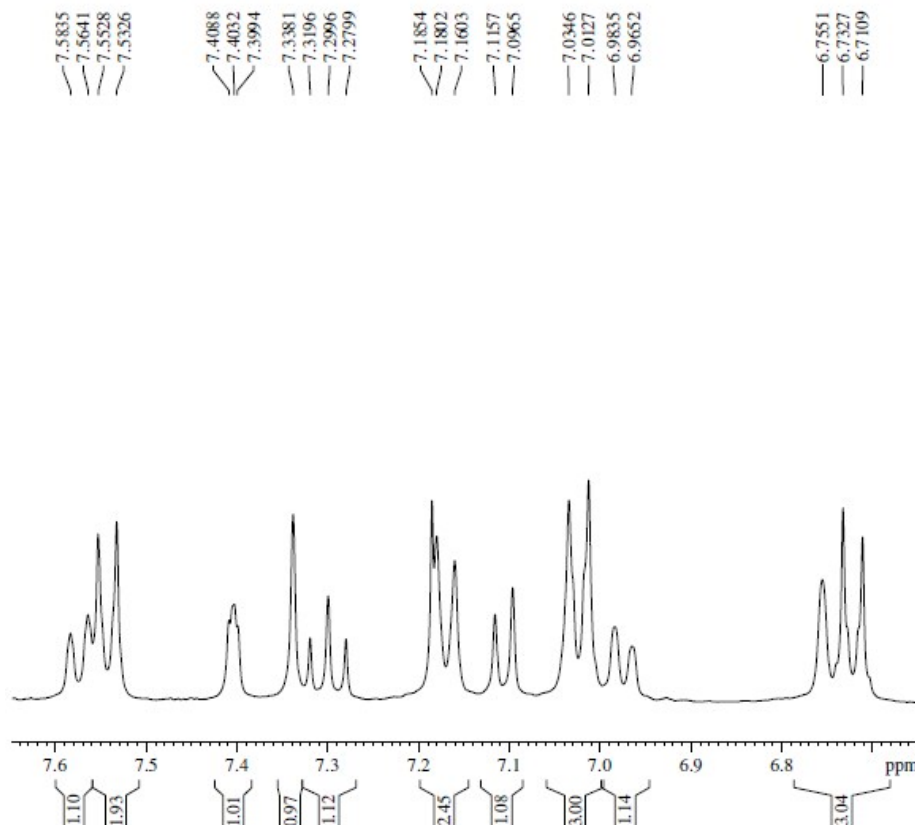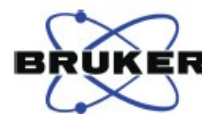

Current Data Parameters  
 NAME 22-MAY-FN-2017  
 EXPNO 370  
 PROCNO 1

F2 - Acquisition Parameters  
 Date\_ 20170522  
 Time 15.16  
 INSTRUM spect  
 PROBHD 5 mm PABBO BB/  
 PULPROG zg30  
 TD 65536  
 SOLVENT CDCl3  
 NS 8  
 DS 0  
 SWH 9615.385 Hz  
 FIDRES 0.146719 Hz  
 AQ 3.4078720 sec  
 RG 114.26  
 DW 52.000 usec  
 DE 6.50 usec  
 TE 297.3 K  
 D1 1.00000000 sec  
 TDO 1

==== CHANNEL f1 ====  
 SFO1 400.1629712 MHz  
 NUC1 1H  
 P1 13.20 usec  
 PLW1 13.00000000 W

F2 - Processing parameters  
 SI 65536  
 SF 400.1605401 MHz  
 WDW EM  
 SSB 0  
 LB 0.30 Hz  
 GB 0  
 PC 1.00

Figure 62: <sup>1</sup>H NMR spectrum of 3u (expansion)



NRBK-146

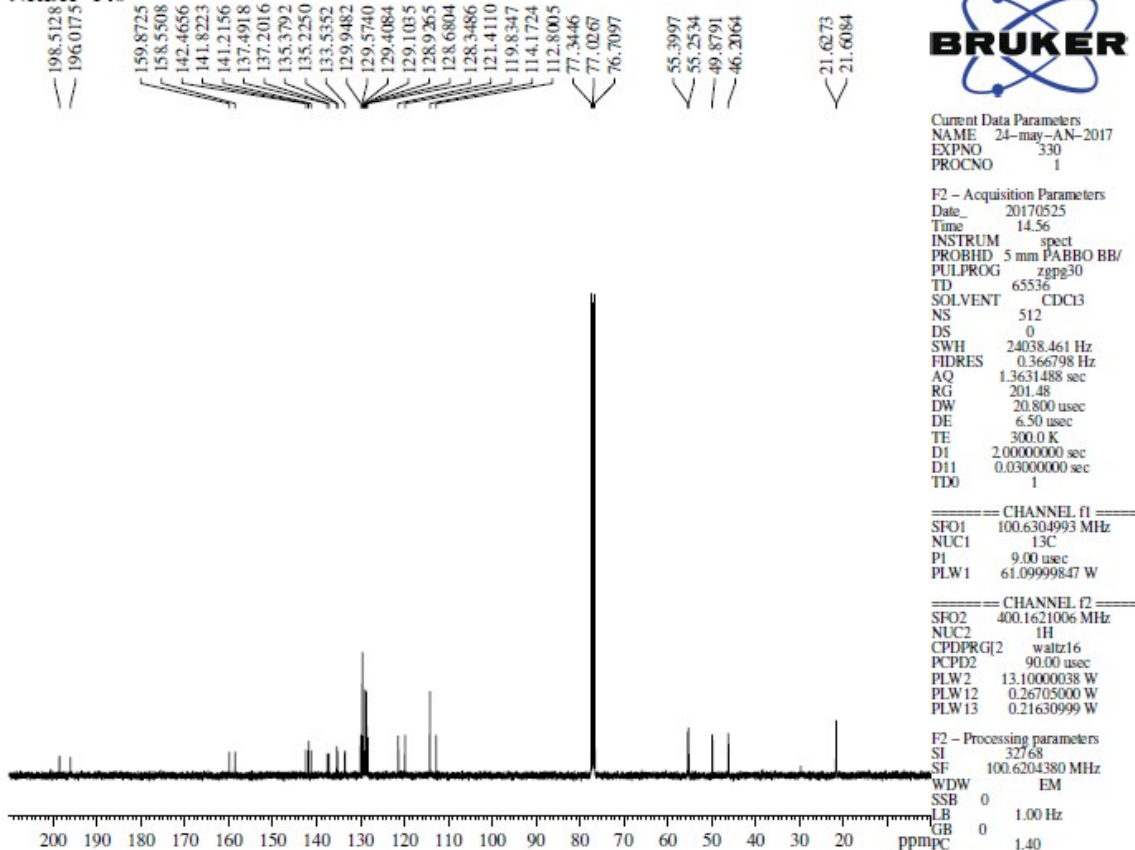

Figure 63: <sup>13</sup>C NMR spectrum of 3u

NRBK 147

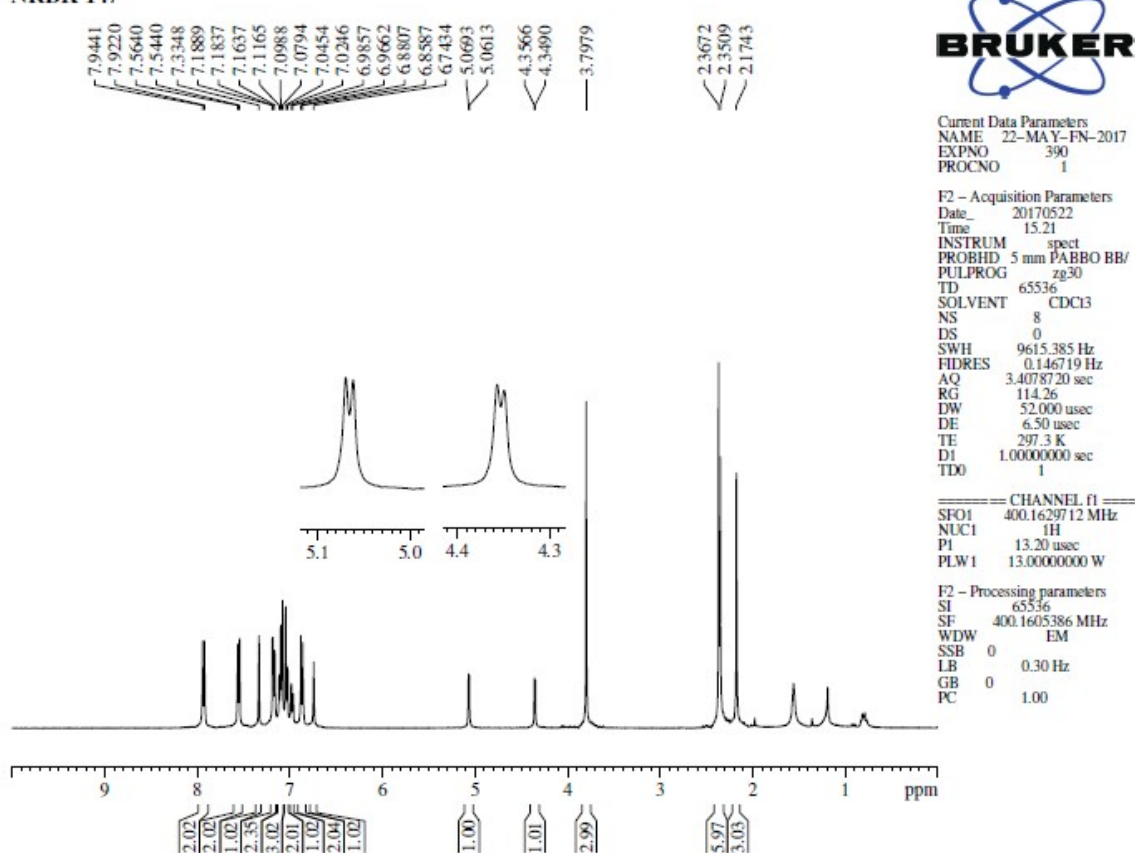

Figure 64: <sup>1</sup>H NMR spectrum of 3v

NRBK 147

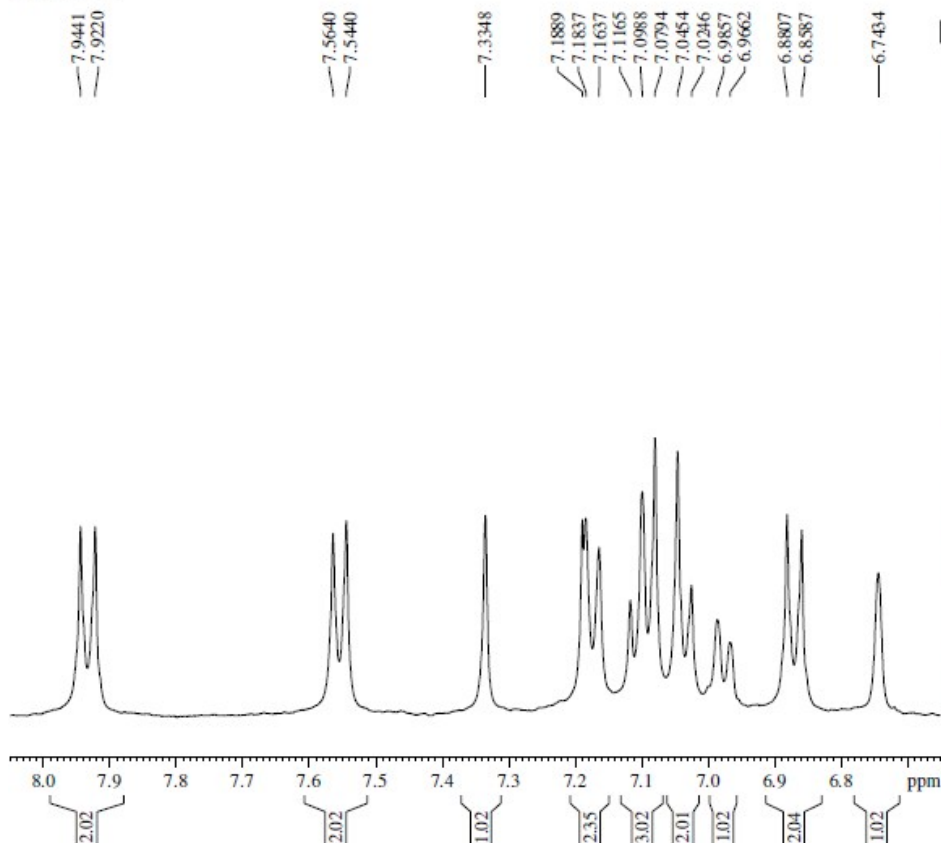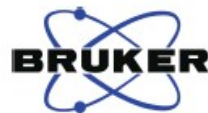

Current Data Parameters  
 NAME 22-MAY-FN-2017  
 EXPNO 390  
 PROCNO 1

F2 - Acquisition Parameters  
 Date\_ 20170522  
 Time 15.21  
 INSTRUM spect  
 PROBHD 5 mm PABBO BB/  
 PULPROG zg30  
 TD 65536  
 SOLVENT CDCl3  
 NS 8  
 DS 0  
 SWH 9615.385 Hz  
 FIDRES 0.146719 Hz  
 AQ 3.4078720 sec  
 RG 114.26  
 DW 52.000 usec  
 DE 6.50 usec  
 TE 297.3 K  
 D1 1.00000000 sec  
 TDO 1

==== CHANNEL f1 ====  
 SFO1 400.1629712 MHz  
 NUC1 1H  
 P1 13.20 usec  
 PLW1 13.00000000 W

F2 - Processing parameters  
 SI 65536  
 SF 400.1605386 MHz  
 WDW EM  
 SSB 0  
 LB 0.30 Hz  
 GB 0  
 PC 1.00

Figure 65: <sup>1</sup>H NMR spectrum of 3v (expansion)

NRBK-147

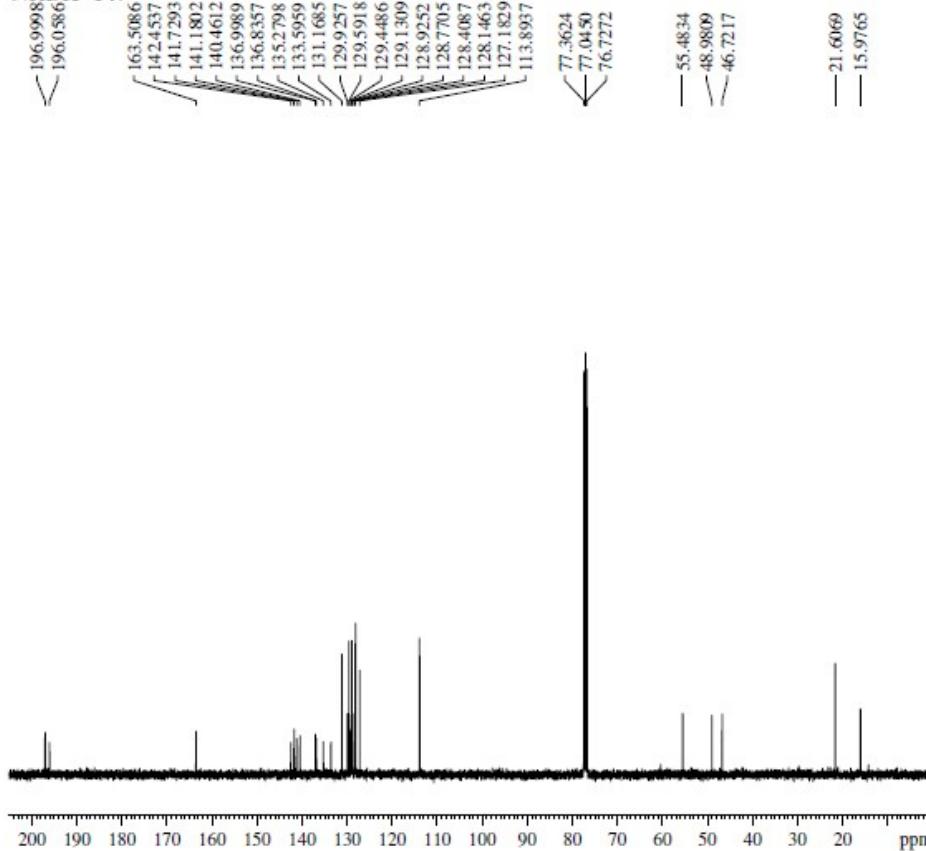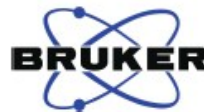

Current Data Parameters  
 NAME 18-May-FN-2017  
 EXPNO 340  
 PROCNO 1

F2 - Acquisition Parameters  
 Date\_ 20170518  
 Time 17.56  
 INSTRUM spect  
 PROBHD 5 mm PABBO BB/  
 PULPROG zgpg30  
 TD 65536  
 SOLVENT CDCl3  
 NS 184  
 DS 0  
 SWH 24038.461 Hz  
 FIDRES 0.366798 Hz  
 AQ 1.3631488 sec  
 RG 201.48  
 DW 20.800 usec  
 DE 6.50 usec  
 TE 299.1 K  
 D1 2.00000000 sec  
 D11 0.03000000 sec  
 TDO 1

==== CHANNEL f1 ====  
 SFO1 100.6304993 MHz  
 NUC1 13C  
 P1 9.90 usec  
 PLW1 53.00000000 W

==== CHANNEL f2 ====  
 SFO2 400.1621006 MHz  
 NUC2 1H  
 CPDPRG[2] waltz16  
 PCPD2 90.00 usec  
 PLW2 13.00000000 W  
 PLW12 0.27963999 W  
 PLW13 0.22651000 W

F2 - Processing parameters  
 SI 32768  
 SF 100.6204380 MHz  
 WDW EM  
 SSB 0  
 LB 1.00 Hz  
 GB 0  
 PC 1.40

Figure 66: <sup>13</sup>C NMR spectrum of 3v

NRBK-171

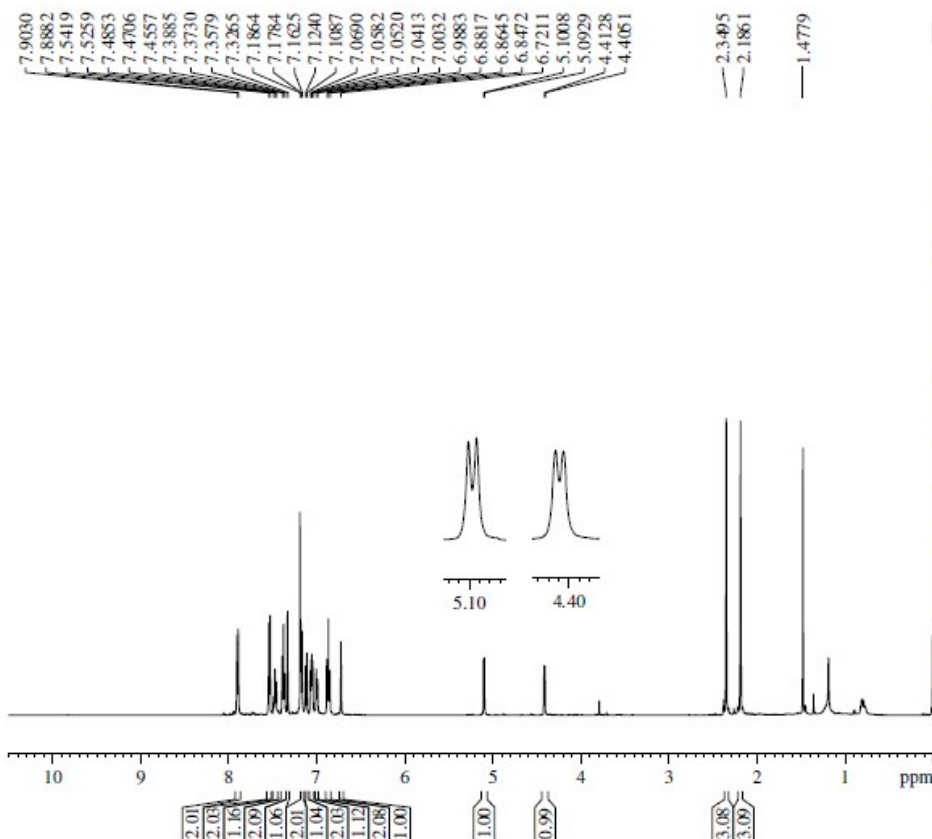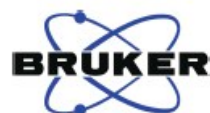

Current Data Parameters  
 NAME 07-JULY-FN-2017  
 EXPNO 310  
 PROCNO 1

F2 - Acquisition Parameters  
 Date\_ 20170707  
 Time 8.06  
 INSTRUM spect  
 PROBHD 5 mm PATX1 1H  
 PULPROG zg30  
 TD 65536  
 SOLVENT CDCl3  
 NS 16  
 DS 0  
 SWH 10026.738 Hz  
 FIDRES 0.152996 Hz  
 AQ 3.2680619 sec  
 RG 201.78  
 DW 49.867 usec  
 DE 6.50 usec  
 TE 300.0 K  
 D1 1.00000000 sec  
 TDO 1

==== CHANNEL f1 ====  
 SFO1 500.6794419 MHz  
 NUC1 1H  
 P1 6.45 usec  
 PLW1 13.6000038 W

F2 - Processing parameters  
 SI 65536  
 SF 500.6763986 MHz  
 WDW EM  
 SSB 0  
 LB 0.30 Hz  
 GB 0  
 PC 1.00

Figure 67: <sup>1</sup>H NMR spectrum of 3w

NRBK-171

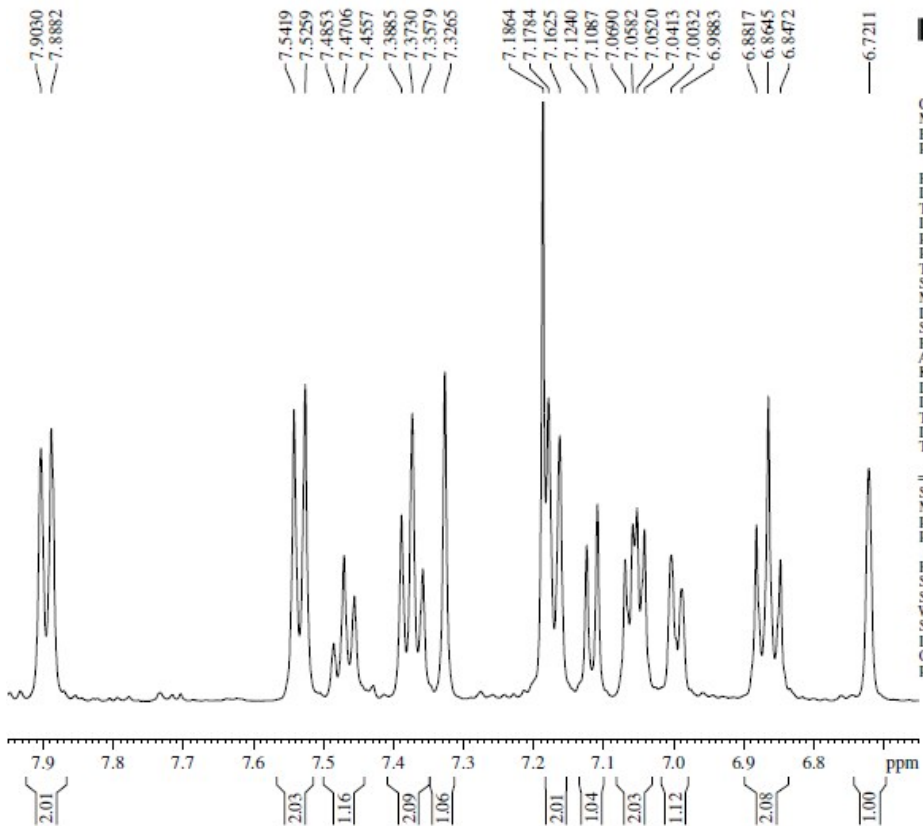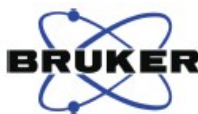

Current Data Parameters  
 NAME 07-JULY-FN-2017  
 EXPNO 310  
 PROCNO 1

F2 - Acquisition Parameters  
 Date\_ 20170707  
 Time 8.06  
 INSTRUM spect  
 PROBHD 5 mm PATX1 1H  
 PULPROG zg30  
 TD 65536  
 SOLVENT CDCl3  
 NS 16  
 DS 0  
 SWH 10026.738 Hz  
 FIDRES 0.152996 Hz  
 AQ 3.2680619 sec  
 RG 201.78  
 DW 49.867 usec  
 DE 6.50 usec  
 TE 300.0 K  
 D1 1.00000000 sec  
 TDO 1

==== CHANNEL f1 ====  
 SFO1 500.6794419 MHz  
 NUC1 1H  
 P1 6.45 usec  
 PLW1 13.6000038 W

F2 - Processing parameters  
 SI 65536  
 SF 500.6763986 MHz  
 WDW EM  
 SSB 0  
 LB 0.30 Hz  
 GB 0  
 PC 1.00

Figure 68: <sup>1</sup>H NMR spectrum of 3w (expansion)

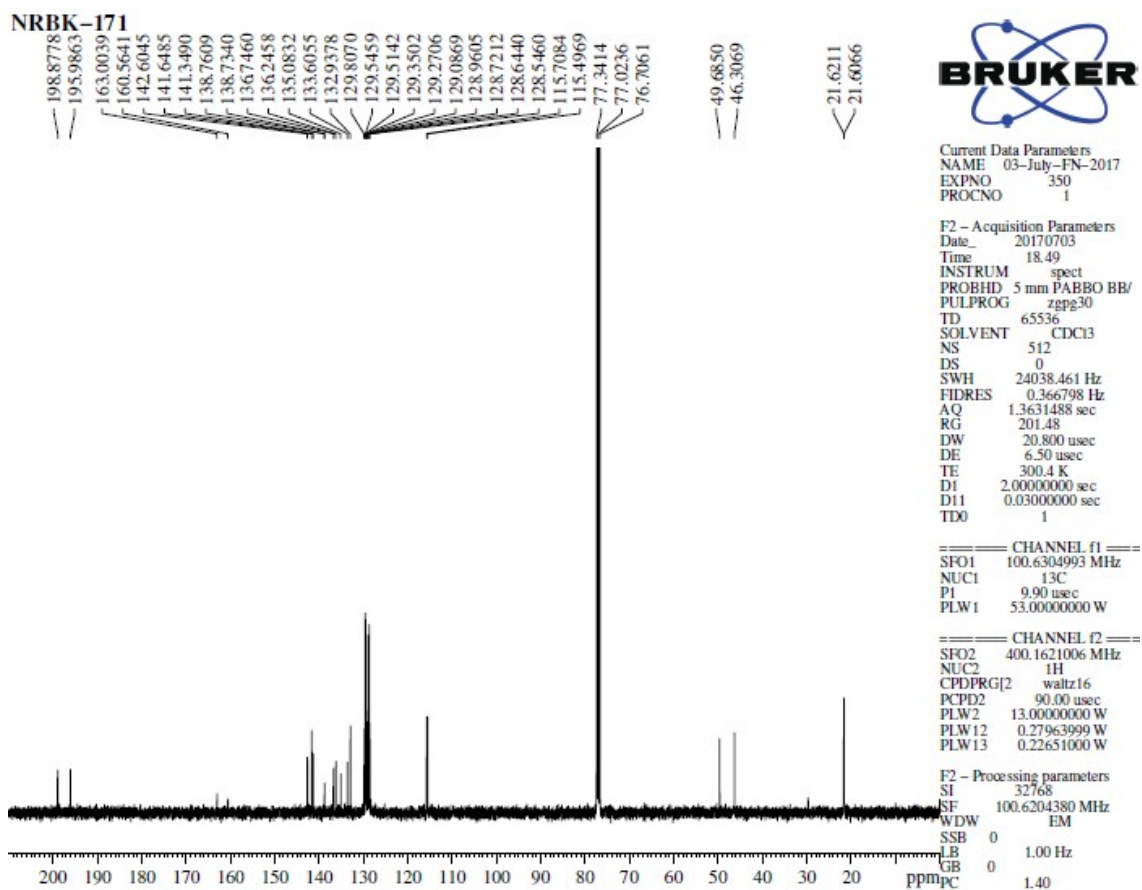

Figure 69:  $^{13}\text{C}$  NMR spectrum of 3w

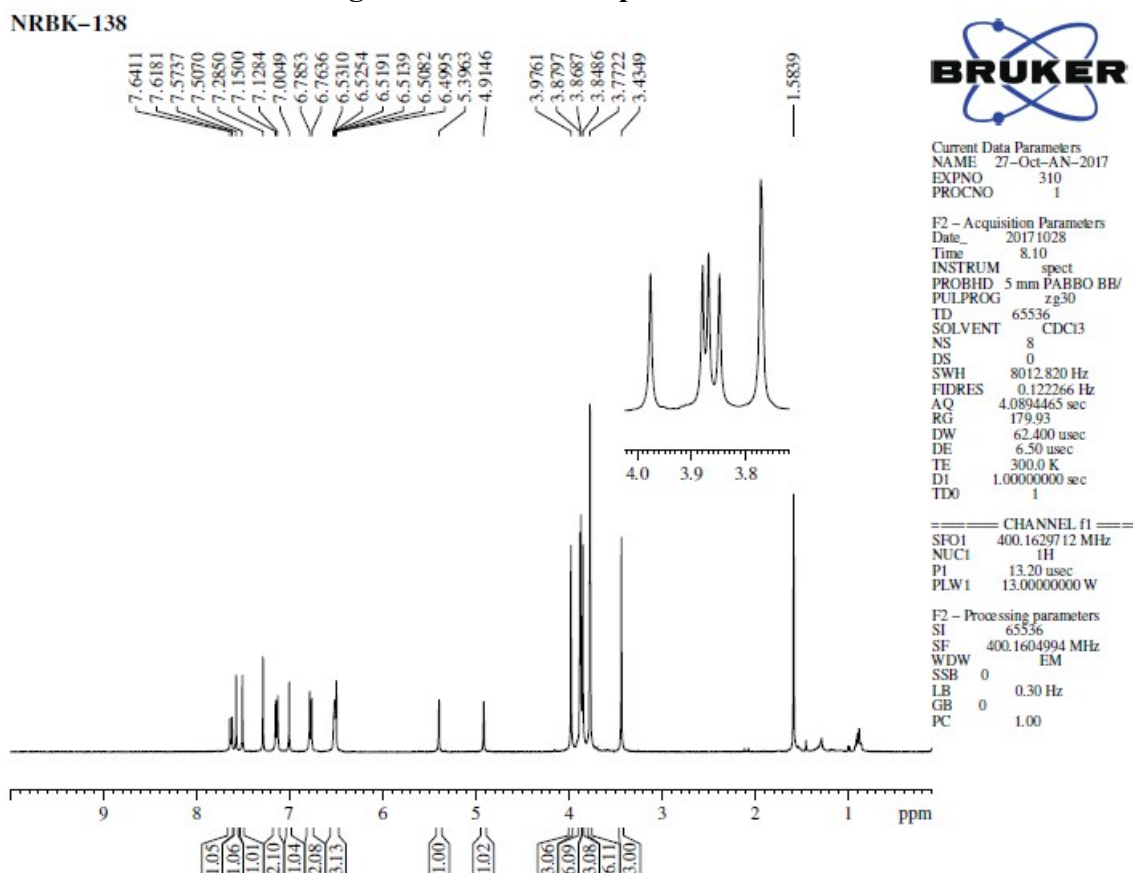

Figure 70:  $^1\text{H}$  NMR spectrum of 3x

NRBK-138

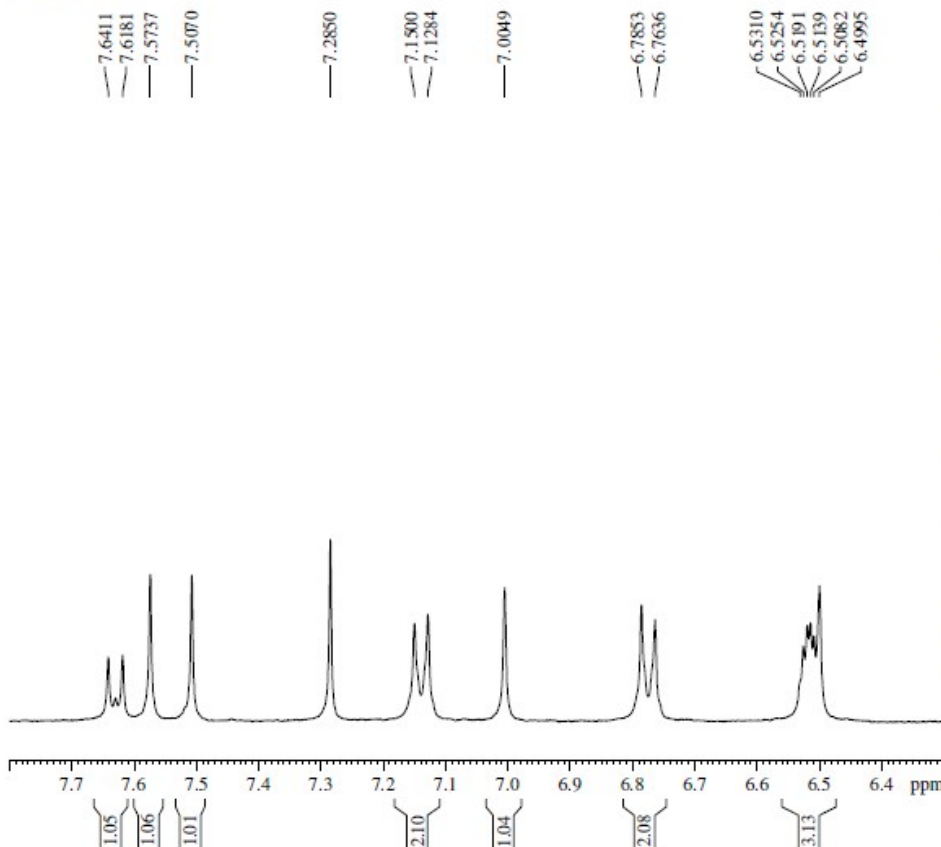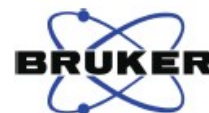

Current Data Parameters  
 NAME 27-Oct-AN-2017  
 EXPNO 310  
 PROCNO 1

F2 - Acquisition Parameters  
 Date\_ 20171028  
 Time 8.10  
 INSTRUM spect  
 PROBHD 5 mm PABBO BB/  
 PULPROG zg30  
 TD 65536  
 SOLVENT CDCl3  
 NS 8  
 DS 0  
 SWH 8012.820 Hz  
 FIDRES 0.122266 Hz  
 AQ 4.0894465 sec  
 RG 179.93  
 DW 62.400 usec  
 DE 6.50 usec  
 TE 300.0 K  
 D1 1.00000000 sec  
 TD0 1

==== CHANNEL f1 ====  
 SFO1 400.1629712 MHz  
 NUC1 1H  
 P1 13.20 usec  
 PLW1 13.00000000 W

F2 - Processing parameters  
 SI 65536  
 SF 400.1604994 MHz  
 WDW EM  
 SSB 0  
 LB 0.30 Hz  
 GB 0  
 PC 1.00

Figure 71: <sup>1</sup>H NMR spectrum of 3x (expansion)

NRBK-138

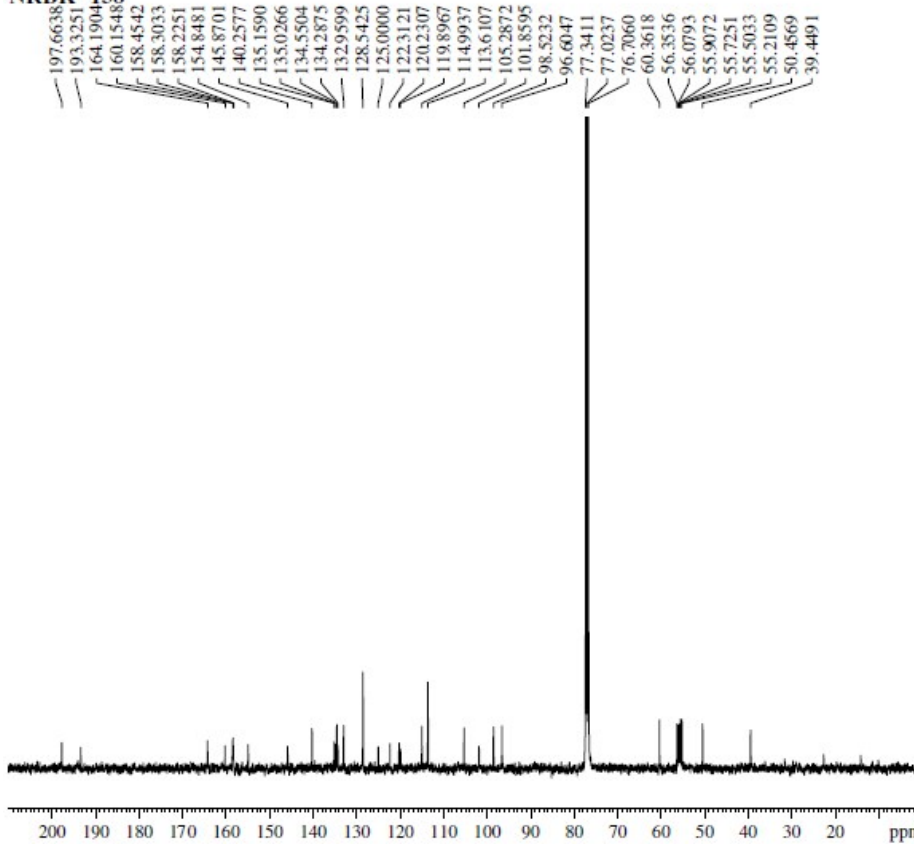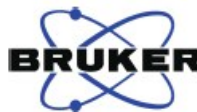

Current Data Parameters  
 NAME 03-NOV-FN-2017  
 EXPNO 330  
 PROCNO 1

F2 - Acquisition Parameters  
 Date\_ 20171103  
 Time 20.53  
 INSTRUM spect  
 PROBHD 5 mm PABBO BB/  
 PULPROG zgpg30  
 TD 65536  
 SOLVENT CDCl3  
 NS 512  
 DS 0  
 SWH 24038.461 Hz  
 FIDRES 0.366798 Hz  
 AQ 1.3631488 sec  
 RG 201.48  
 DW 20.800 usec  
 DE 6.50 usec  
 TE 300.0 K  
 D1 2.00000000 sec  
 D11 0.03000000 sec  
 TD0 1

==== CHANNEL f1 ====  
 SFO1 100.6304993 MHz  
 NUC1 13C  
 P1 9.90 usec  
 PLW1 53.00000000 W

==== CHANNEL f2 ====  
 SFO2 400.1621006 MHz  
 NUC2 1H  
 CPDPRG[2] waltz16  
 PCPD2 90.00 usec  
 PLW2 13.00000000 W  
 PLW12 0.27963999 W  
 PLW13 0.22651000 W

F2 - Processing parameters  
 SI 32768  
 SF 100.6204380 MHz  
 WDW EM  
 SSB 0  
 LB 3.00 Hz  
 GB 0  
 PC 1.40

Figure 72: <sup>13</sup>C NMR spectrum of 3x

NRBK-155

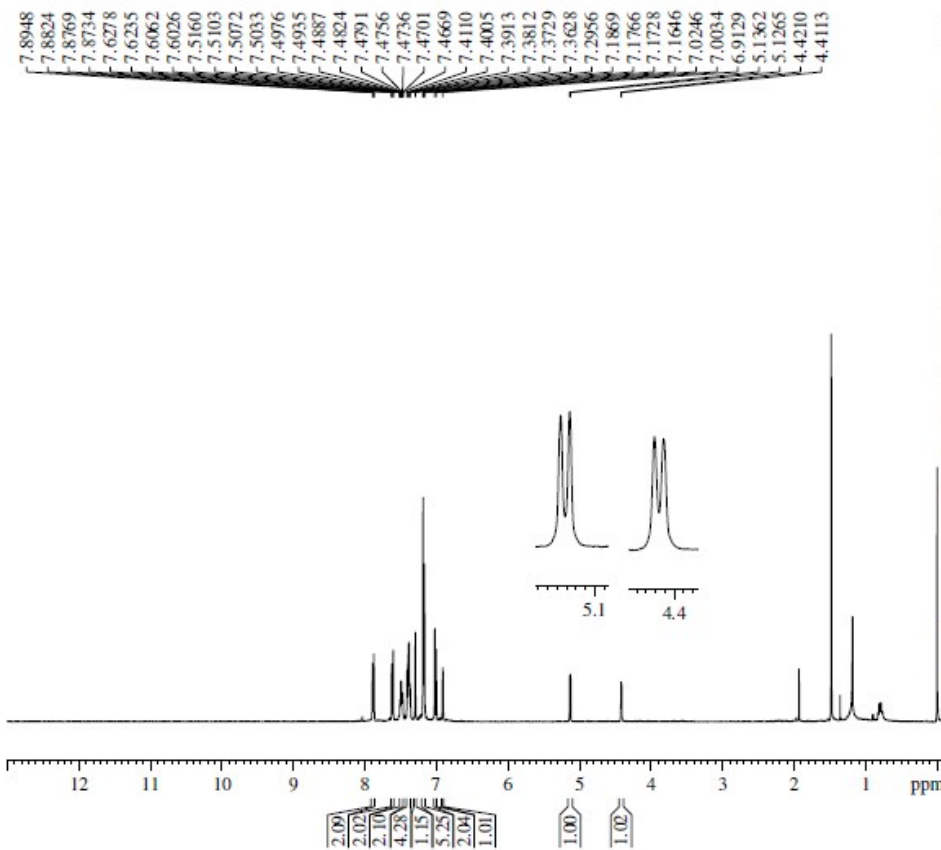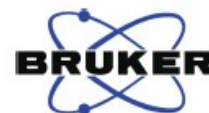

Current Data Parameters  
 NAME 04-Oct-FN-2017  
 EXPNO 340  
 PROCNO 1

F2 - Acquisition Parameters  
 Date\_ 20171004  
 Time 14.42  
 INSTRUM spect  
 PROBHD 5 mm PABBO BB/  
 PULPROG zg30  
 TD 65536  
 SOLVENT CDCl3  
 NS 8  
 DS 0  
 SWH 9615.385 Hz  
 FIDRES 0.146719 Hz  
 AQ 3.4078720 sec  
 RG 159.22  
 DW 52.000 usec  
 DE 6.50 usec  
 TE 300.0 K  
 D1 1.00000000 sec  
 TD0 1

==== CHANNEL f1 ====  
 SFO1 400.1629712 MHz  
 NUC1 1H  
 P1 13.20 usec  
 PLW1 13.00000000 W

F2 - Processing parameters  
 SI 65536  
 SF 400.1605387 MHz  
 WDW EM  
 SSB 0  
 LB 0.30 Hz  
 GB 0  
 PC 1.00

Figure 73: <sup>1</sup>H NMR spectrum of 3y

NRBK-155

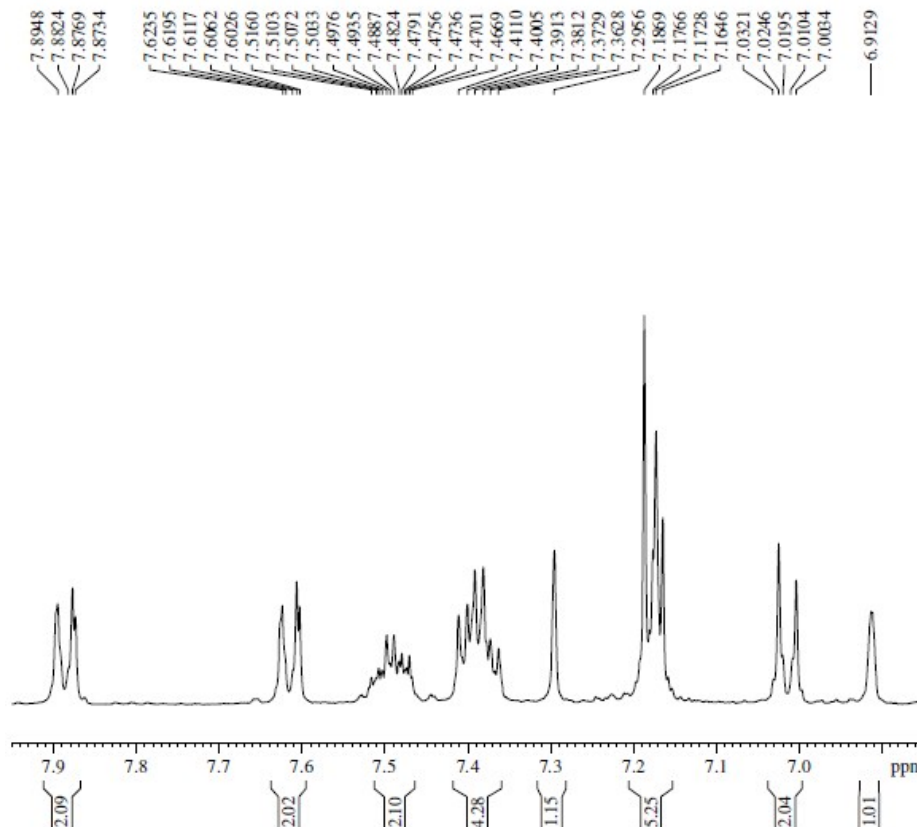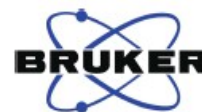

Current Data Parameters  
 NAME 04-Oct-FN-2017  
 EXPNO 340  
 PROCNO 1

F2 - Acquisition Parameters  
 Date\_ 20171004  
 Time 14.42  
 INSTRUM spect  
 PROBHD 5 mm PABBO BB/  
 PULPROG zg30  
 TD 65536  
 SOLVENT CDCl3  
 NS 8  
 DS 0  
 SWH 9615.385 Hz  
 FIDRES 0.146719 Hz  
 AQ 3.4078720 sec  
 RG 159.22  
 DW 52.000 usec  
 DE 6.50 usec  
 TE 300.0 K  
 D1 1.00000000 sec  
 TD0 1

==== CHANNEL f1 ====  
 SFO1 400.1629712 MHz  
 NUC1 1H  
 P1 13.20 usec  
 PLW1 13.00000000 W

F2 - Processing parameters  
 SI 65536  
 SF 400.1605387 MHz  
 WDW EM  
 SSB 0  
 LB 0.30 Hz  
 GB 0  
 PC 1.00

Figure 74: <sup>1</sup>H NMR spectrum of 3y (expansion)

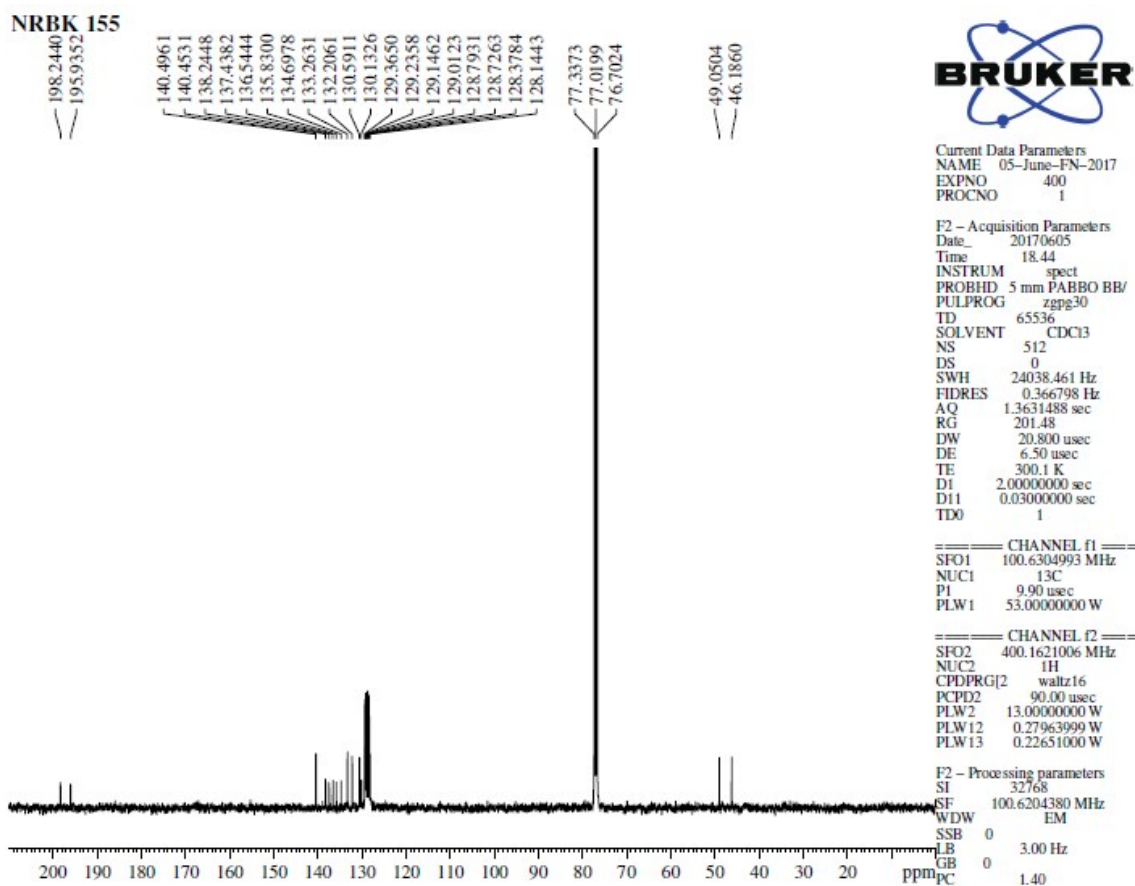

Figure 75:  $^{13}\text{C}$  NMR spectrum of 3y

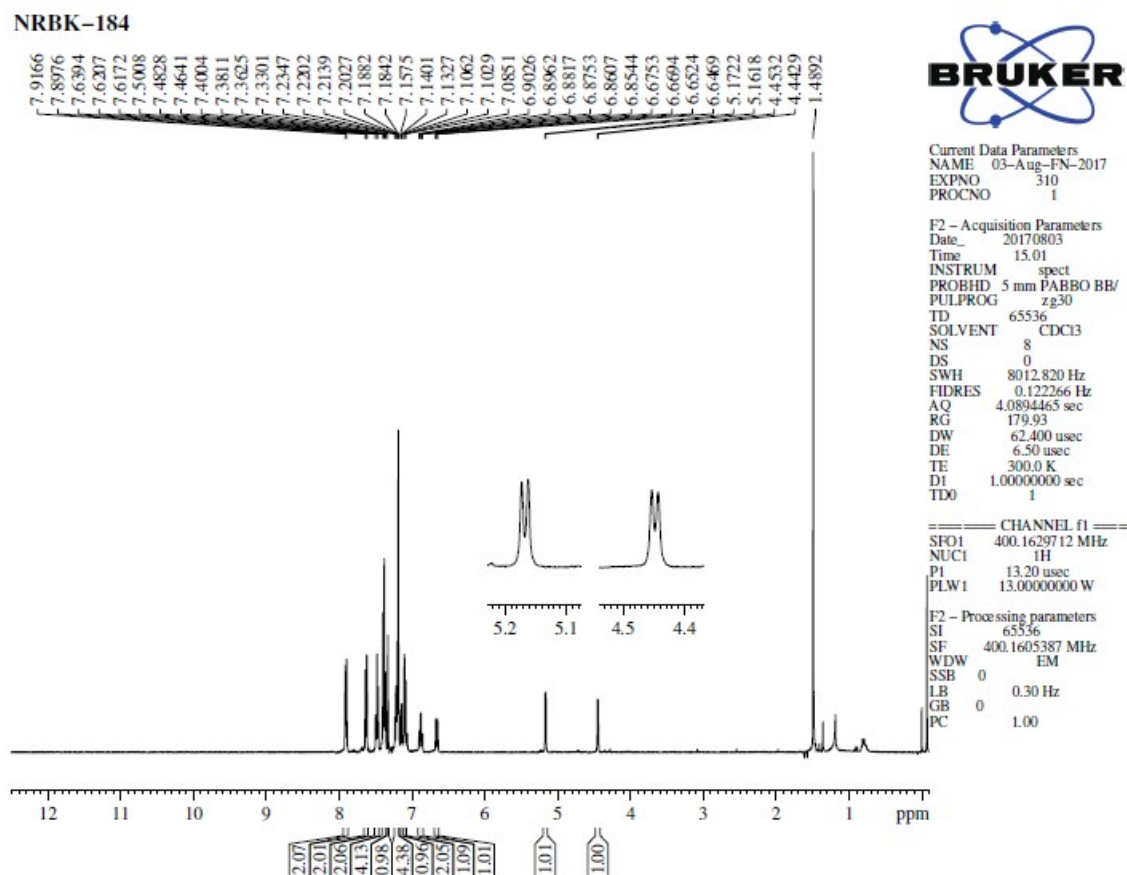

Figure 76:  $^1\text{H}$  NMR spectrum of 3z

NRBK-184

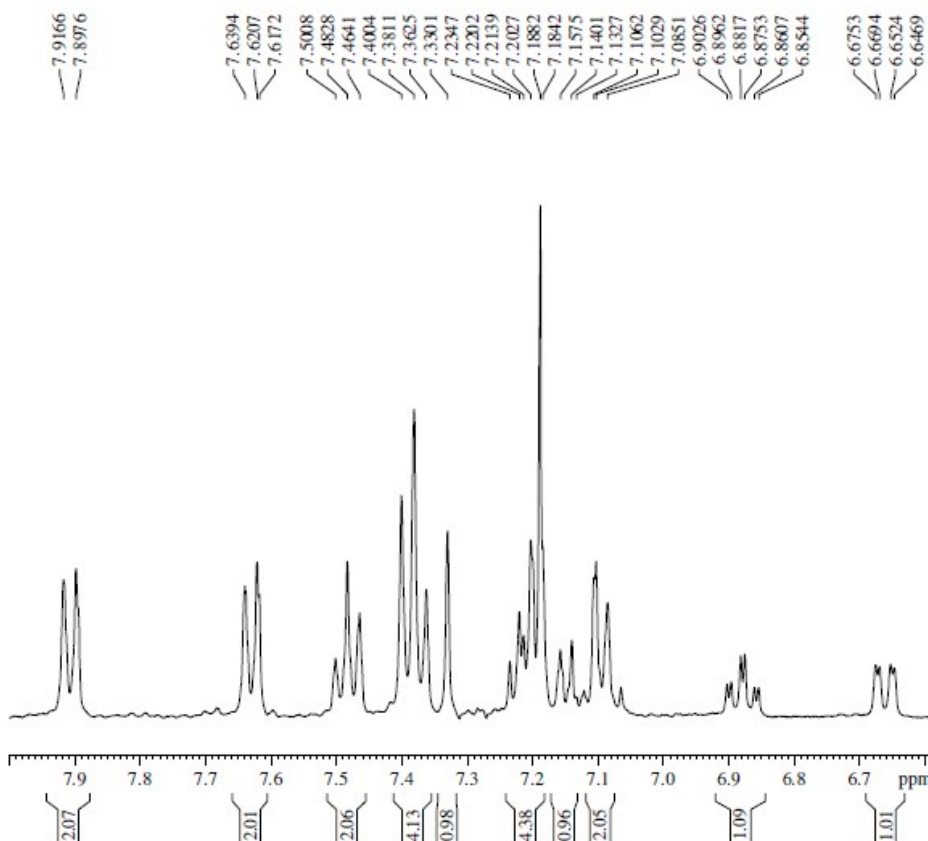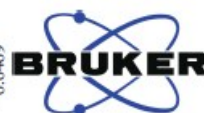

Current Data Parameters  
 NAME 03-Aug-FN-2017  
 EXPNO 310  
 PROCNO 1

F2 - Acquisition Parameters  
 Date\_ 20170803  
 Time 15.01  
 INSTRUM spect  
 PROBHD 5 mm PABBO BB/  
 PULPROG zg30  
 TD 65536  
 SOLVENT CDCl3  
 NS 8  
 DS 0  
 SWH 8012.820 Hz  
 FIDRES 0.122266 Hz  
 AQ 4.0894465 sec  
 RG 179.93  
 DW 62.400 usec  
 DE 6.50 usec  
 TE 300.0 K  
 D1 1.00000000 sec  
 TD0 1

==== CHANNEL f1 ====  
 SFO1 400.1629712 MHz  
 NUC1 1H  
 P1 13.20 usec  
 PLW1 13.00000000 W

F2 - Processing parameters  
 SI 65536  
 SF 400.1605387 MHz  
 WDW EM  
 SSB 0  
 LB 0.30 Hz  
 GB 0  
 PC 1.00

Figure 77: <sup>1</sup>H NMR spectrum of 3z (expansion)

NRBK-184

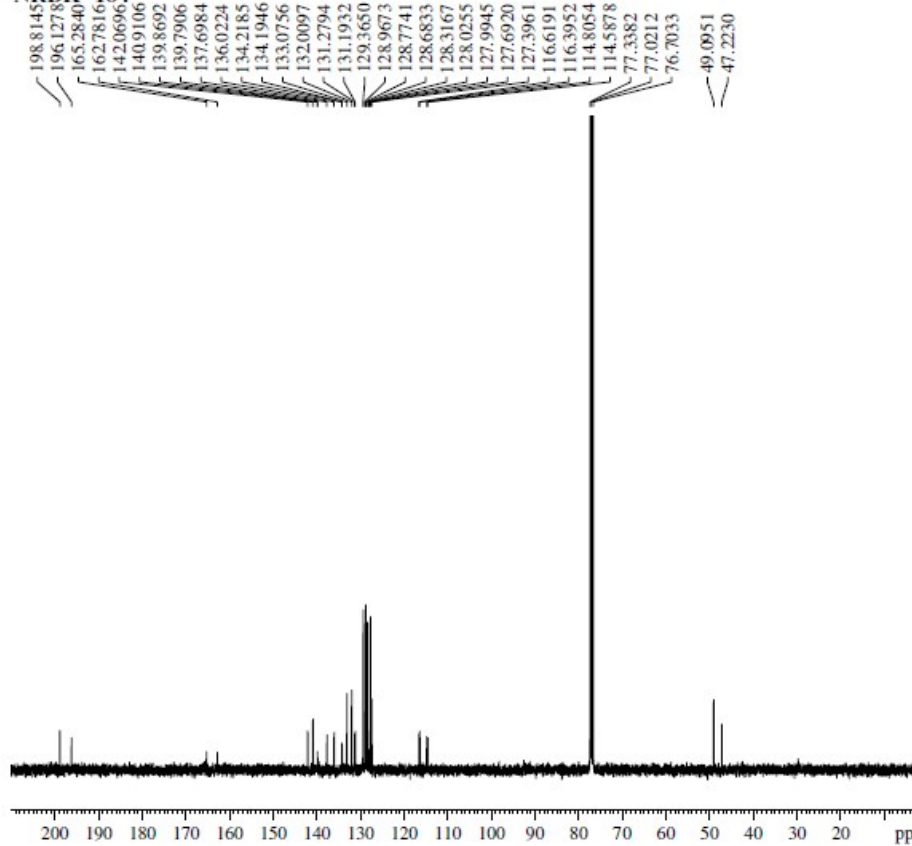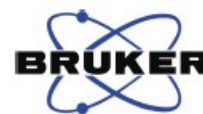

Current Data Parameters  
 NAME 11-Aug-AN-2017  
 EXPNO 450  
 PROCNO 1

F2 - Acquisition Parameters  
 Date\_ 20170812  
 Time 17.57  
 INSTRUM spect  
 PROBHD 5 mm PABBO BB/  
 PULPROG zgpg30  
 TD 65536  
 SOLVENT CDCl3  
 NS 512  
 DS 0  
 SWH 24038.461 Hz  
 FIDRES 0.366798 Hz  
 AQ 1.3631488 sec  
 RG 201.48  
 DW 20.800 usec  
 DE 6.50 usec  
 TE 300.0 K  
 D1 2.00000000 sec  
 D11 0.03000000 sec  
 TD0 1

==== CHANNEL f1 ====  
 SFO1 100.6304993 MHz  
 NUC1 13C  
 P1 9.90 usec  
 PLW1 53.00000000 W

==== CHANNEL f2 ====  
 SFO2 400.1621006 MHz  
 NUC2 1H  
 CPDPRG2 waltz16  
 PCPD2 90.00 usec  
 PLW2 13.00000000 W  
 PLW12 0.27963999 W  
 PLW13 0.22651000 W

F2 - Processing parameters  
 SI 32768  
 SF 100.6204380 MHz  
 WDW EM  
 SSB 0  
 LB 1.00 Hz  
 GB 0  
 PC 1.40

Figure 78: <sup>13</sup>C NMR spectrum of 3z



NRBK-196

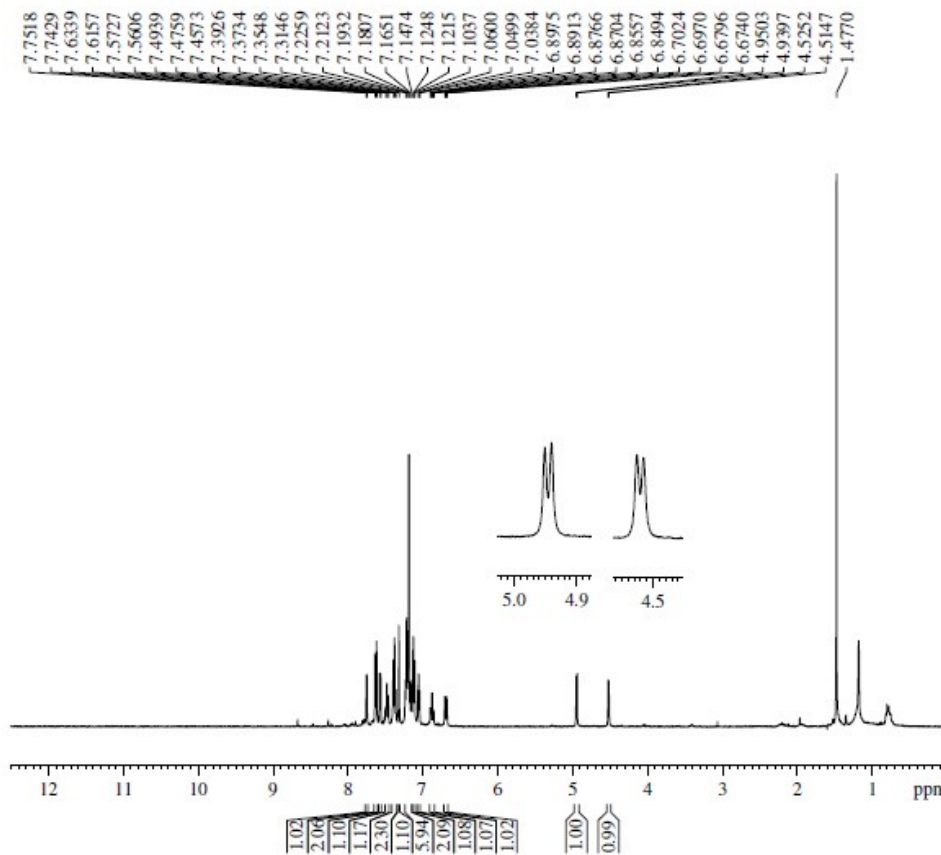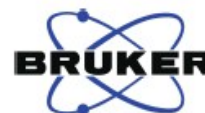

Current Data Parameters  
NAME 24-aug-fn-2017  
EXPNO 320  
PROCNO 1

F2 - Acquisition Parameters  
Date\_ 20170824  
Time 14.49  
INSTRUM spect  
PROBHD 5 mm PABBO BB/  
PULPROG zg30  
TD 65536  
SOLVENT CDCl3  
NS 8  
DS 0  
SWH 8012.820 Hz  
FIDRES 0.122266 Hz  
AQ 4.0894465 sec  
RG 179.93  
DW 62.400 usec  
DE 6.50 usec  
TE 300.0 K  
D1 1.00000000 sec  
TD0 1

==== CHANNEL f1 ====  
SFO1 400.1629712 MHz  
NUC1 1H  
P1 13.20 usec  
PLW1 13.00000000 W

F2 - Processing parameters  
SI 65536  
SF 400.1605421 MHz  
WDW EM  
SSB 0  
LB 0.30 Hz  
GB 0  
PC 1.00

Figure 79: <sup>1</sup>H NMR spectrum of 3a

NRBK-196

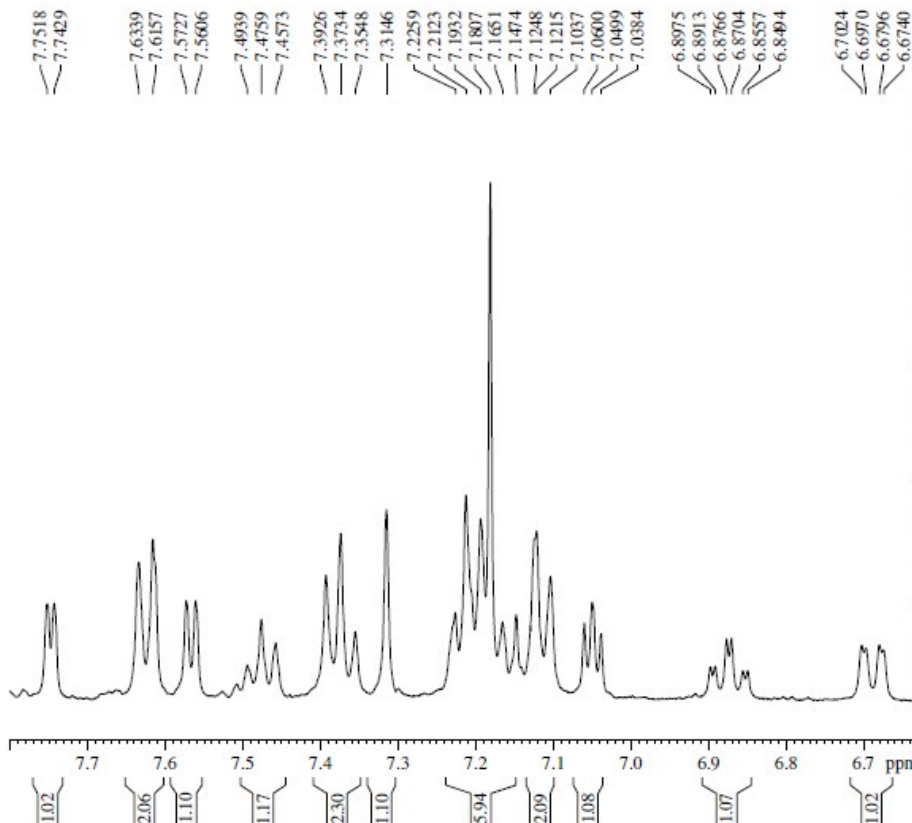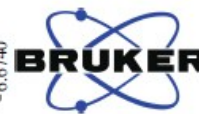

Current Data Parameters  
NAME 24-aug-fn-2017  
EXPNO 320  
PROCNO 1

F2 - Acquisition Parameters  
Date\_ 20170824  
Time 14.49  
INSTRUM spect  
PROBHD 5 mm PABBO BB/  
PULPROG zg30  
TD 65536  
SOLVENT CDCl3  
NS 8  
DS 0  
SWH 8012.820 Hz  
FIDRES 0.122266 Hz  
AQ 4.0894465 sec  
RG 179.93  
DW 62.400 usec  
DE 6.50 usec  
TE 300.0 K  
D1 1.00000000 sec  
TD0 1

==== CHANNEL f1 ====  
SFO1 400.1629712 MHz  
NUC1 1H  
P1 13.20 usec  
PLW1 13.00000000 W

F2 - Processing parameters  
SI 65536  
SF 400.1605421 MHz  
WDW EM  
SSB 0  
LB 0.30 Hz  
GB 0  
PC 1.00

Figure 80: <sup>1</sup>H NMR spectrum of 3a (expansion)

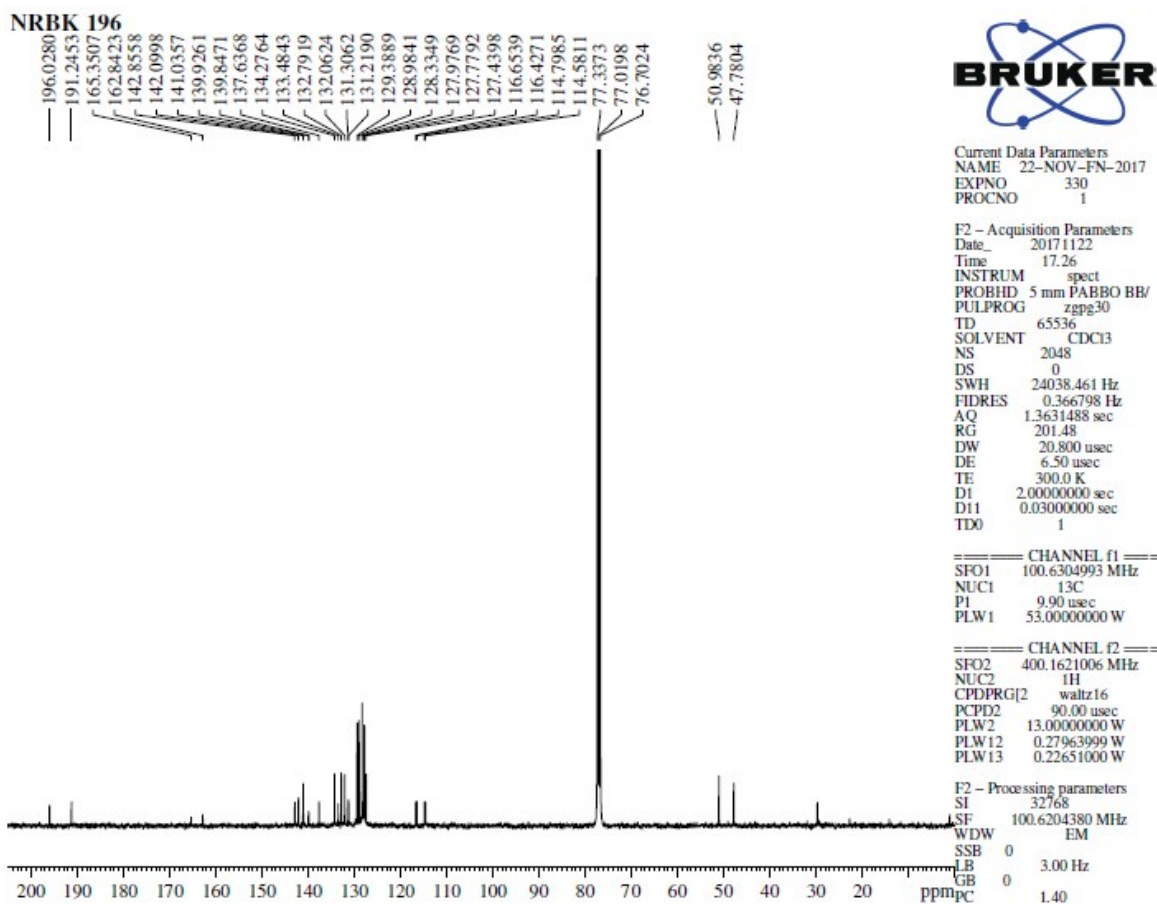

Figure 81: <sup>13</sup>C NMR spectrum of 3a

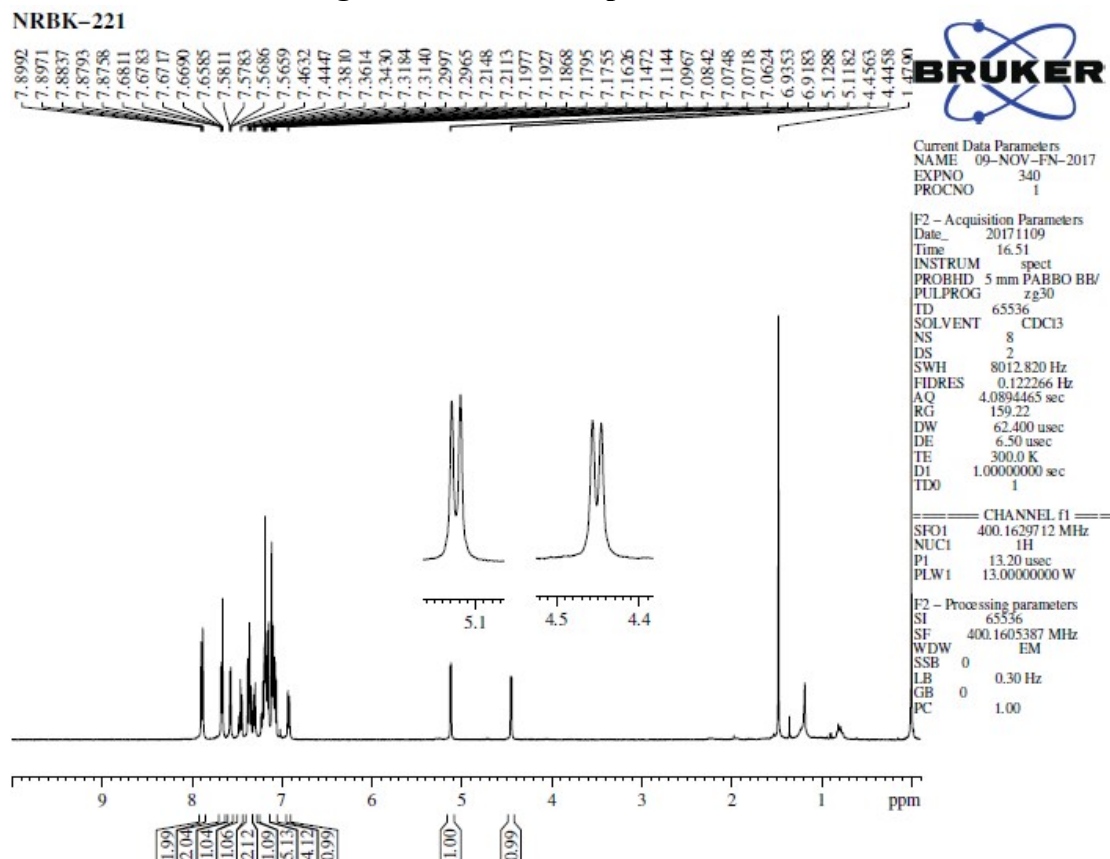

Figure 82: <sup>1</sup>H NMR spectrum of 3zb

NRBK-221

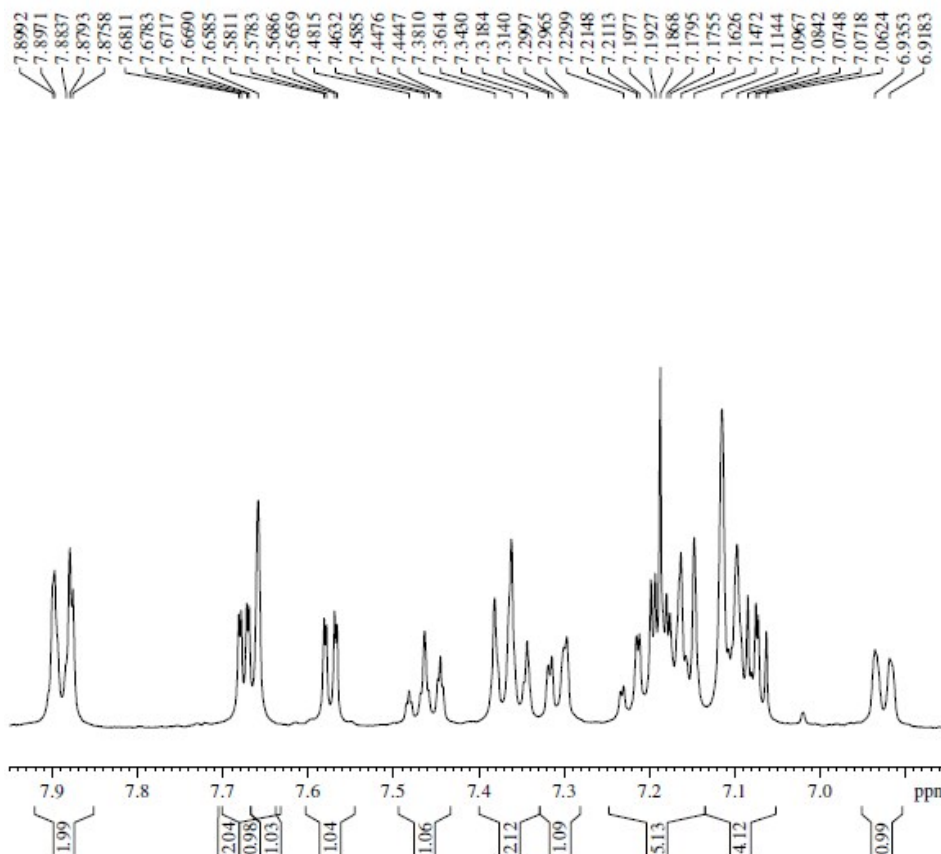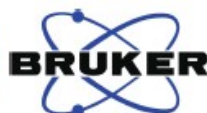

Current Data Parameters  
NAME 09-NOV-FN-2017  
EXPNO 340  
PROCNO 1

F2 - Acquisition Parameters  
Date\_ 20171109  
Time 16.51  
INSTRUM spect  
PROBHD 5 mm PABBO BB/  
PULPROG zg30  
TD 65536  
SOLVENT CDCl3  
NS 8  
DS 2  
SWH 8012.820 Hz  
FIDRES 0.122266 Hz  
AQ 4.0894465 sec  
RG 159.22  
DW 62.400 usec  
DE 6.50 usec  
TE 300.0 K  
D1 1.00000000 sec  
TD0 1

==== CHANNEL f1 ====  
SFO1 400.1629712 MHz  
NUC1 1H  
P1 13.20 usec  
PLW1 13.00000000 W

F2 - Processing parameters  
SI 65536  
SF 400.1605387 MHz  
WDW EM  
SSB 0  
LB 0.30 Hz  
GB 0  
PC 1.00

Figure 83: <sup>1</sup>H NMR spectrum of 3zb (expansion)

NRBK-221

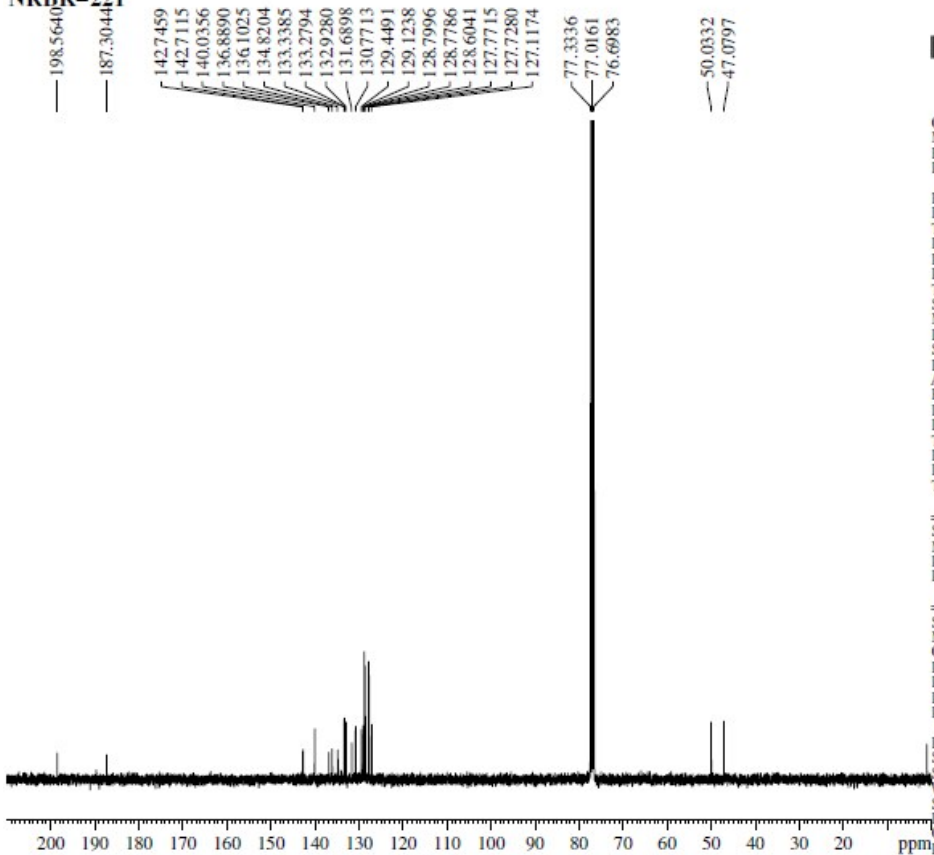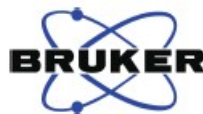

Current Data Parameters  
NAME 09-NOV-AN-2017  
EXPNO 310  
PROCNO 1

F2 - Acquisition Parameters  
Date\_ 20171110  
Time 7.44  
INSTRUM spect  
PROBHD 5 mm PABBO BB/  
PULPROG zgpg30  
TD 65536  
SOLVENT CDCl3  
NS 512  
DS 0  
SWH 24038.461 Hz  
FIDRES 0.366798 Hz  
AQ 1.3631488 sec  
RG 201.48  
DW 20.800 usec  
DE 6.50 usec  
TE 300.0 K  
D1 2.00000000 sec  
D11 0.03000000 sec  
TD0 1

==== CHANNEL f1 ====  
SFO1 100.6304993 MHz  
NUC1 13C  
P1 9.90 usec  
PLW1 53.00000000 W

==== CHANNEL f2 ====  
SFO2 400.1621006 MHz  
NUC2 1H  
CPDPRG2 waltz16  
PCPD2 90.00 usec  
PLW2 13.00000000 W  
PLW12 0.27963999 W  
PLW13 0.22651000 W

F2 - Processing parameters  
SI 32768  
SF 100.6204380 MHz  
WDW EM  
SSB 0  
LB 1.00 Hz  
GB 0  
PC 1.40

Figure 84: <sup>13</sup>C NMR spectrum of 3zb

NRBK-219

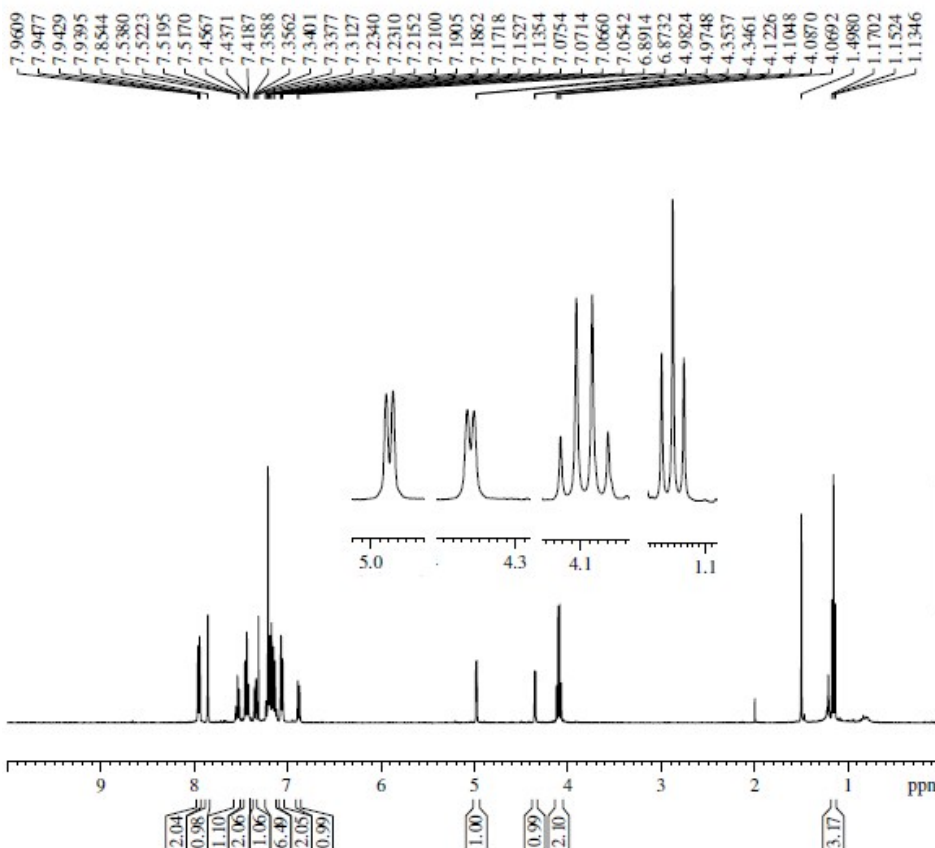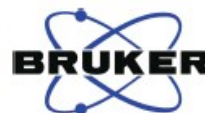

Current Data Parameters  
NAME 01-DEC-FN-2017  
EXPNO 310  
PROCNO 1

F2 - Acquisition Parameters  
Date\_ 20171201  
Time 15.29  
INSTRUM spect  
PROBHD 5 mm PABBO BB/  
PULPROG zg30  
TD 65536  
SOLVENT CDCl3  
NS 8  
DS 0  
SWH 8012.820 Hz  
FIDRES 0.122266 Hz  
AQ 4.0894465 sec  
RG 159.22  
DW 62.400 usec  
DE 6.50 usec  
TE 300.0 K  
D1 1.00000000 sec  
TD0 1

==== CHANNEL f1 ====  
SFO1 400.1629712 MHz  
NUC1 1H  
P1 13.20 usec  
PLW1 13.00000000 W

F2 - Processing parameters  
SI 65536  
SF 400.1605295 MHz  
WDW EM  
SSB 0  
LB 0.30 Hz  
GB 0  
PC 1.00

Figure 85: <sup>1</sup>H NMR spectrum of 3zc

NRBK-219

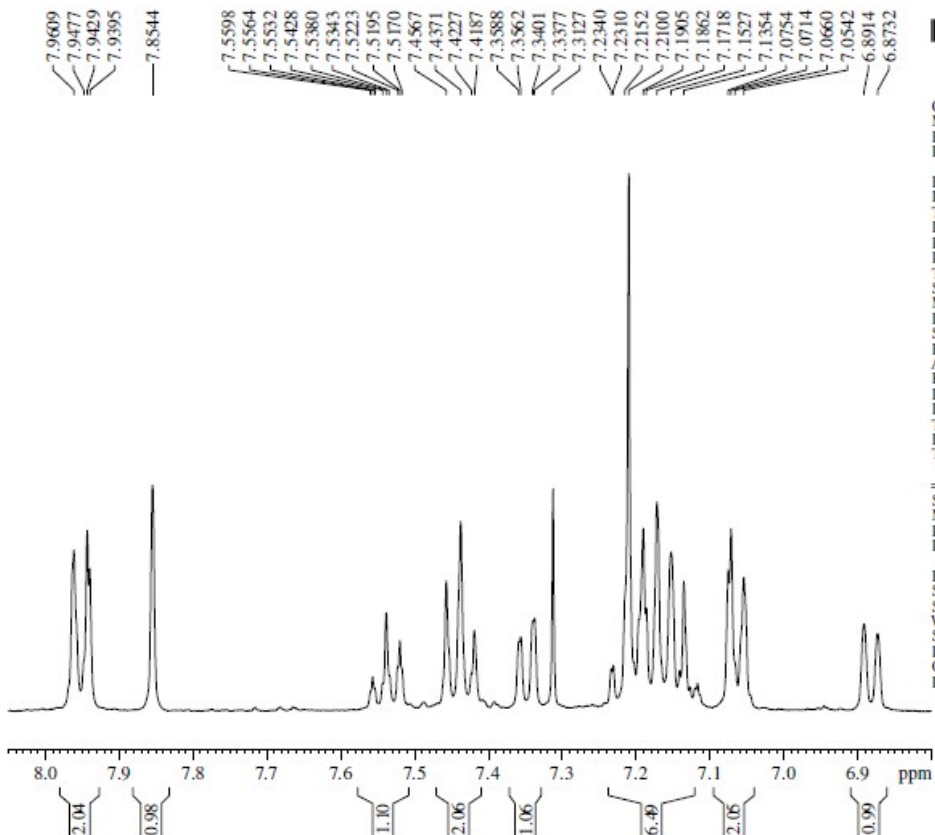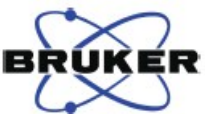

Current Data Parameters  
NAME 01-DEC-FN-2017  
EXPNO 310  
PROCNO 1

F2 - Acquisition Parameters  
Date\_ 20171201  
Time 15.29  
INSTRUM spect  
PROBHD 5 mm PABBO BB/  
PULPROG zg30  
TD 65536  
SOLVENT CDCl3  
NS 8  
DS 0  
SWH 8012.820 Hz  
FIDRES 0.122266 Hz  
AQ 4.0894465 sec  
RG 159.22  
DW 62.400 usec  
DE 6.50 usec  
TE 300.0 K  
D1 1.00000000 sec  
TD0 1

==== CHANNEL f1 ====  
SFO1 400.1629712 MHz  
NUC1 1H  
P1 13.20 usec  
PLW1 13.00000000 W

F2 - Processing parameters  
SI 65536  
SF 400.1605295 MHz  
WDW EM  
SSB 0  
LB 0.30 Hz  
GB 0  
PC 1.00

Figure 86: <sup>1</sup>H NMR spectrum of 3zc (expansion)

NRBK-219

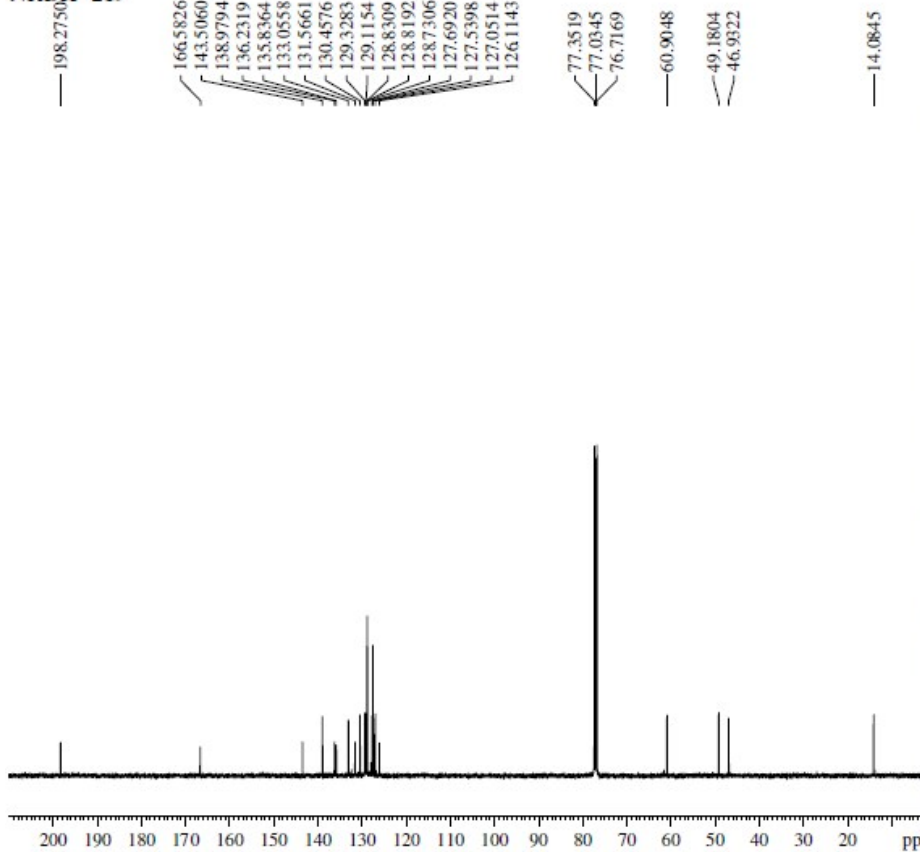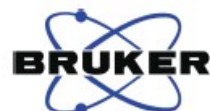

Current Data Parameters  
 NAME 09-OCT-FN-2017  
 EXPNO 350  
 PROCNO 1

F2 - Acquisition Parameters  
 Date\_ 20171009  
 Time 21.29  
 INSTRUM spect  
 PROBHD 5 mm PABBO BB/  
 PULPROG zgpg30  
 TD 65536  
 SOLVENT CDCl3  
 NS 512  
 DS 0  
 SWH 24038.461 Hz  
 FIDRES 0.366798 Hz  
 AQ 1.3631488 sec  
 RG 201.48  
 DW 20.800 usec  
 DE 6.50 usec  
 TE 300.0 K  
 D1 2.0000000 sec  
 D11 0.0300000 sec  
 TD0 1

==== CHANNEL f1 ====  
 SFO1 100.6304993 MHz  
 NUC1 13C  
 P1 9.90 usec  
 PLW1 53.00000000 W

==== CHANNEL f2 ====  
 SFO2 400.1621006 MHz  
 NUC2 1H  
 CPDPRG2 waltz16  
 PCPD2 90.00 usec  
 PLW2 13.00000000 W  
 PLW12 0.27963999 W  
 PLW13 0.22651000 W

F2 - Processing parameters  
 SI 32768  
 SF 100.6204380 MHz  
 WDW EM  
 SSB 0  
 LB 1.00 Hz  
 GB 0  
 PC 1.40

Figure 87: <sup>13</sup>C NMR spectrum of 3zc

NRBK-256-MAJOR

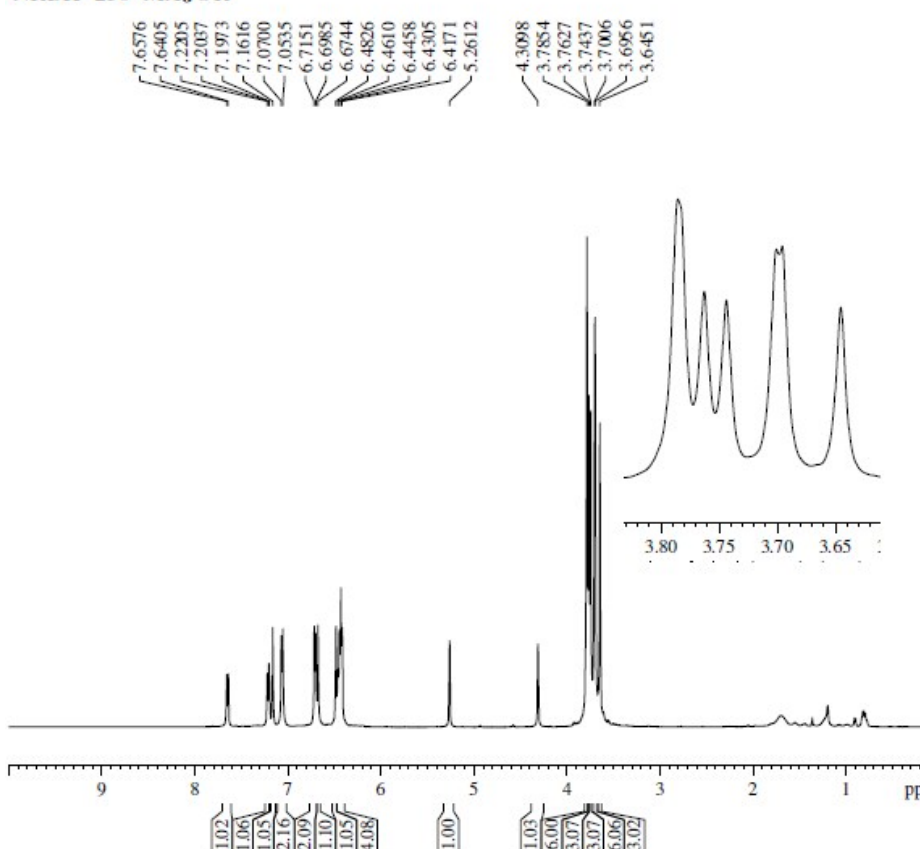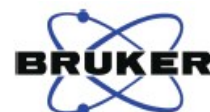

Current Data Parameters  
 NAME 09-APR-AN-2018  
 EXPNO 310  
 PROCNO 1

F2 - Acquisition Parameters  
 Date\_ 20180409  
 Time 22.40  
 INSTRUM spect  
 PROBHD 5 mm PATXI 1H/  
 PULPROG zg30  
 TD 65536  
 SOLVENT CDCl3  
 NS 8  
 DS 2  
 SWH 10026.738 Hz  
 FIDRES 0.152996 Hz  
 AQ 3.2680619 sec  
 RG 81.53  
 DW 49.867 usec  
 DE 6.50 usec  
 TE 300.1 K  
 D1 1.0000000 sec  
 TD0 1

==== CHANNEL f1 ====  
 SFO1 500.6794419 MHz  
 NUC1 1H  
 P1 6.45 usec  
 PLW1 13.60000038 W

F2 - Processing parameters  
 SI 65536  
 SF 500.6763930 MHz  
 WDW EM  
 SSB 0  
 LB 0.30 Hz  
 GB 0  
 PC 1.00

Figure 88: <sup>1</sup>H NMR spectrum of 3zd

NRBK-256-MAJOR

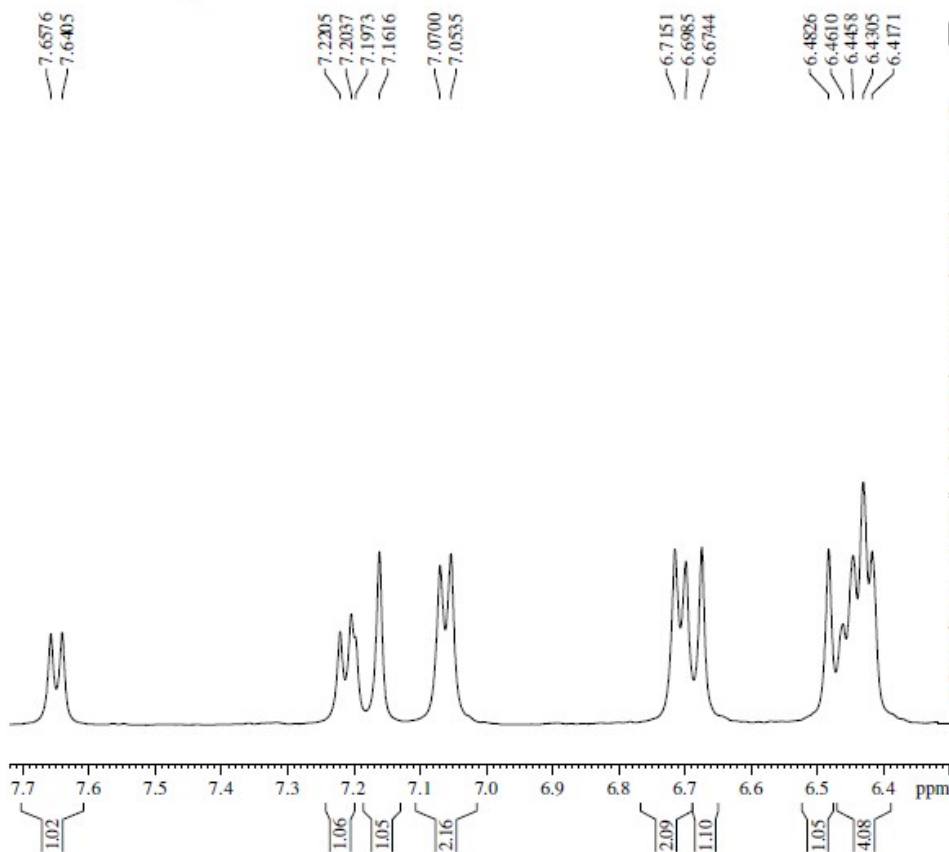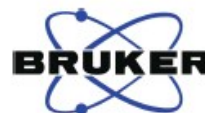

Current Data Parameters  
NAME 09-APR-AN-2018  
EXPNO 310  
PROCNO 1

F2 - Acquisition Parameters  
Date\_ 20180409  
Time 22.40  
INSTRUM spect  
PROBHD 5 mm PATX1 1H  
PULPROG zg30  
TD 65536  
SOLVENT CDCl3  
NS 8  
DS 2  
SWH 10026.738 Hz  
FIDRES 0.152996 Hz  
AQ 3.2680619 sec  
RG 81.53  
DW 49.867 usec  
DE 6.50 usec  
TE 300.1 K  
D1 1.00000000 sec  
TD0 1

==== CHANNEL f1 ====  
SFO1 500.6794419 MHz  
NUC1 1H  
P1 6.45 usec  
PLW1 13.60000038 W

F2 - Processing parameters  
SI 65356  
SF 500.6763930 MHz  
WDW EM  
SSB 0  
LB 0.30 Hz  
GB 0  
PC 1.00

Figure 89: <sup>1</sup>H NMR spectrum of 3zd (expansion)

NRBK-256-MAJOR

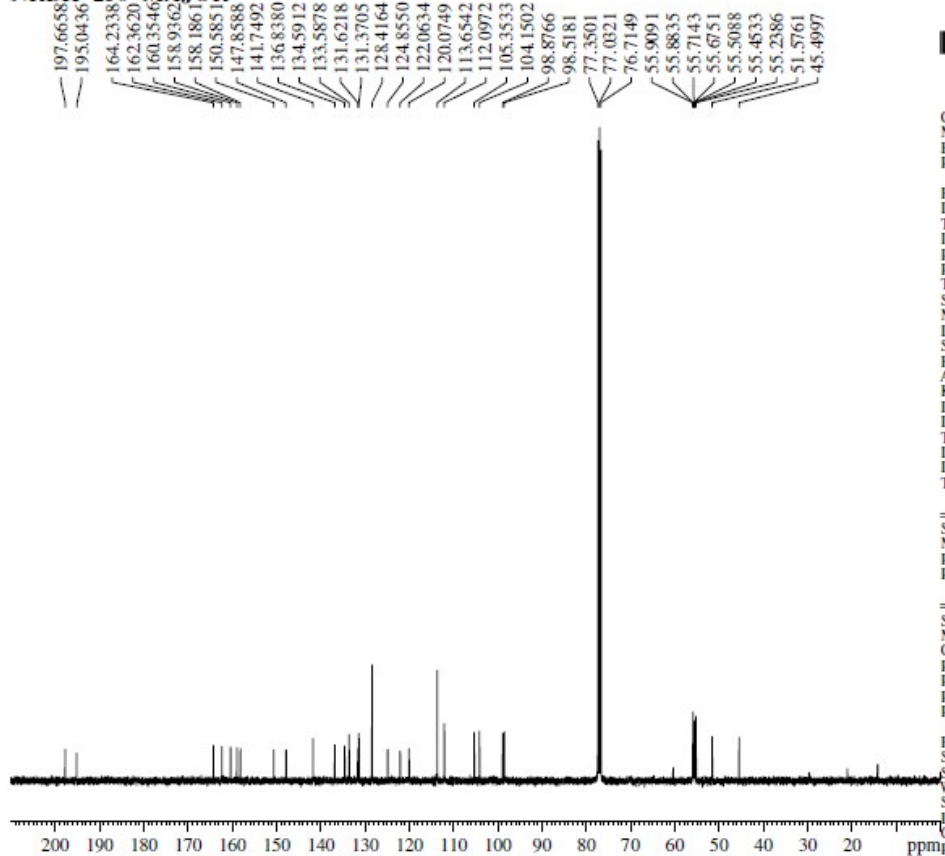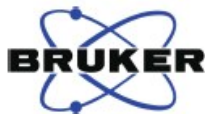

Current Data Parameters  
NAME 26-FEB-FN-2018  
EXPNO 390  
PROCNO 1

F2 - Acquisition Parameters  
Date\_ 20180227  
Time 2.43  
INSTRUM spect  
PROBHD 5 mm FABBO BB/  
PULPROG zgpg30  
TD 65536  
SOLVENT CDCl3  
NS 512  
DS 0  
SWH 24038.461 Hz  
FIDRES 0.366798 Hz  
AQ 1.3631488 sec  
RG 201.48  
DW 20.800 usec  
DE 6.50 usec  
TE 300.0 K  
D1 2.00000000 sec  
D11 0.03000000 sec  
TD0 1

==== CHANNEL f1 ====  
SFO1 100.6304993 MHz  
NUC1 13C  
P1 9.90 usec  
PLW1 53.00000000 W

==== CHANNEL f2 ====  
SFO2 400.1621006 MHz  
NUC2 1H  
CPDPRG[2] waltz16  
PCPD2 90.00 usec  
PLW2 13.00000000 W  
PLW12 0.27963999 W  
PLW13 0.22651000 W

F2 - Processing parameters  
SI 32768  
SF 100.6204380 MHz  
WDW EM  
SSB 0  
LB 1.00 Hz  
GB 0  
PC 1.40

Figure 90: <sup>13</sup>C NMR spectrum of 3zd

NRBK-256-minor

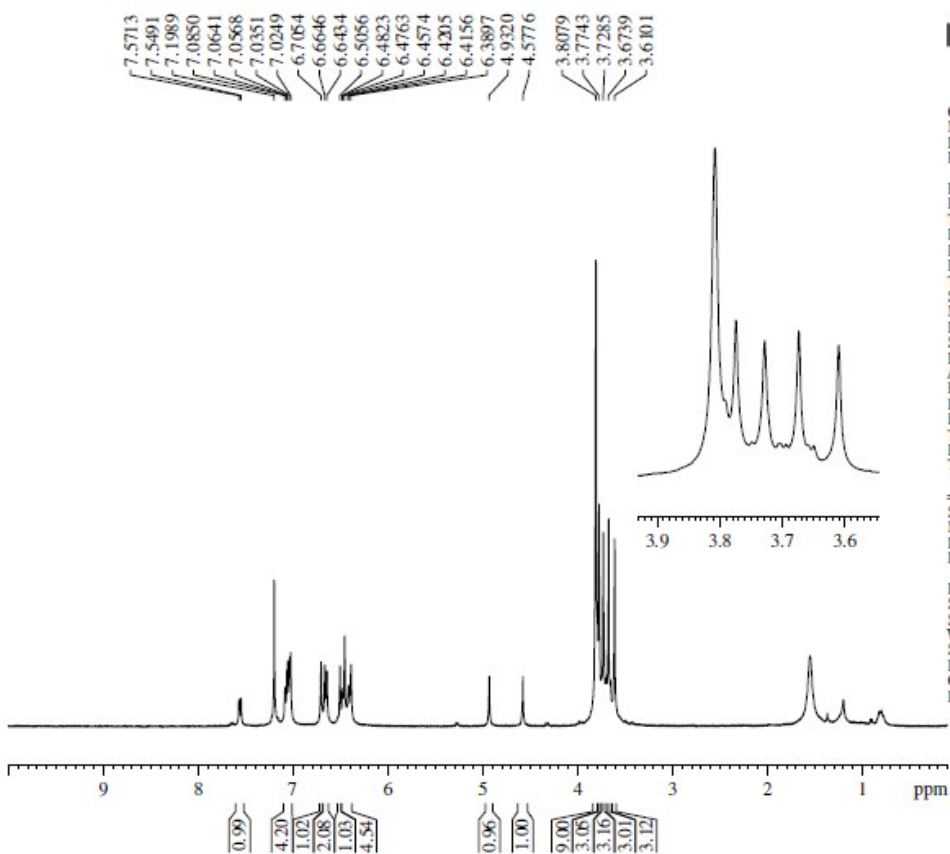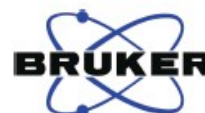

Current Data Parameters  
 NAME 26-Apr-FN-2018  
 EXPNO 310  
 PROCNO 1

F2 - Acquisition Parameters  
 Date\_ 20180426  
 Time 14.53  
 INSTRUM spect  
 PROBHD 5 mm PABBO BB/  
 PULPROG zg30  
 TD 65536  
 SOLVENT CDCl3  
 NS 8  
 DS 0  
 SWH 9615.385 Hz  
 FIDRES 0.146719 Hz  
 AQ 3.4078720 sec  
 RG 159.22  
 DW 52.000 usec  
 DE 6.50 usec  
 TE 300.0 K  
 D1 1.00000000 sec  
 TDO 1

==== CHANNEL f1 ====  
 SFO1 400.1629712 MHz  
 NUC1 1H  
 P1 13.20 usec  
 PLW1 13.00000000 W  
 F2 - Processing parameters  
 SI 65536  
 SF 400.1605336 MHz  
 WDW EM  
 SSB 0  
 LB 0.30 Hz  
 GB 0  
 PC 1.00

Figure 91: <sup>1</sup>H NMR spectrum of 3ze

NRBK-256-minor

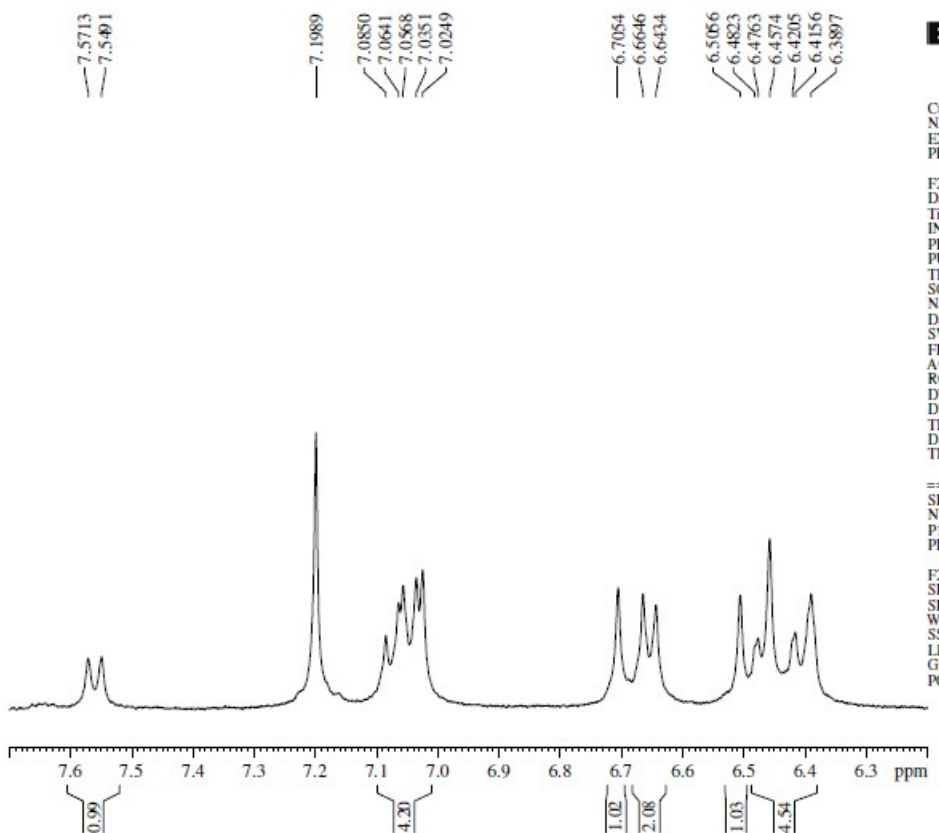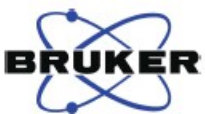

Current Data Parameters  
 NAME 26-Apr-FN-2018  
 EXPNO 310  
 PROCNO 1

F2 - Acquisition Parameters  
 Date\_ 20180426  
 Time 14.53  
 INSTRUM spect  
 PROBHD 5 mm PABBO BB/  
 PULPROG zg30  
 TD 65536  
 SOLVENT CDCl3  
 NS 8  
 DS 0  
 SWH 9615.385 Hz  
 FIDRES 0.146719 Hz  
 AQ 3.4078720 sec  
 RG 159.22  
 DW 52.000 usec  
 DE 6.50 usec  
 TE 300.0 K  
 D1 1.00000000 sec  
 TDO 1

==== CHANNEL f1 ====  
 SFO1 400.1629712 MHz  
 NUC1 1H  
 P1 13.20 usec  
 PLW1 13.00000000 W  
 F2 - Processing parameters  
 SI 65536  
 SF 400.1605336 MHz  
 WDW EM  
 SSB 0  
 LB 0.30 Hz  
 GB 0  
 PC 1.00

Figure 92: <sup>1</sup>H NMR spectrum of 3ze (expansion)

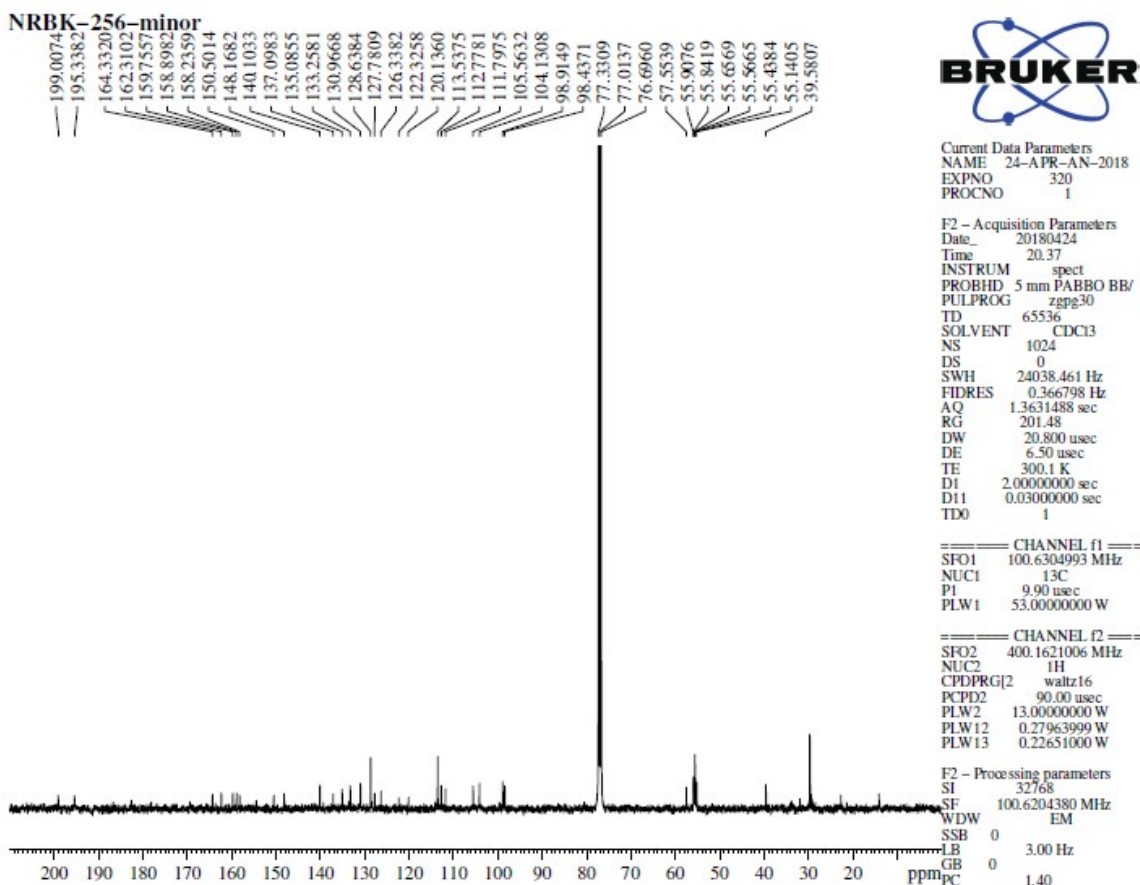

Figure 93:  $^{13}\text{C}$  NMR spectrum of 3ze

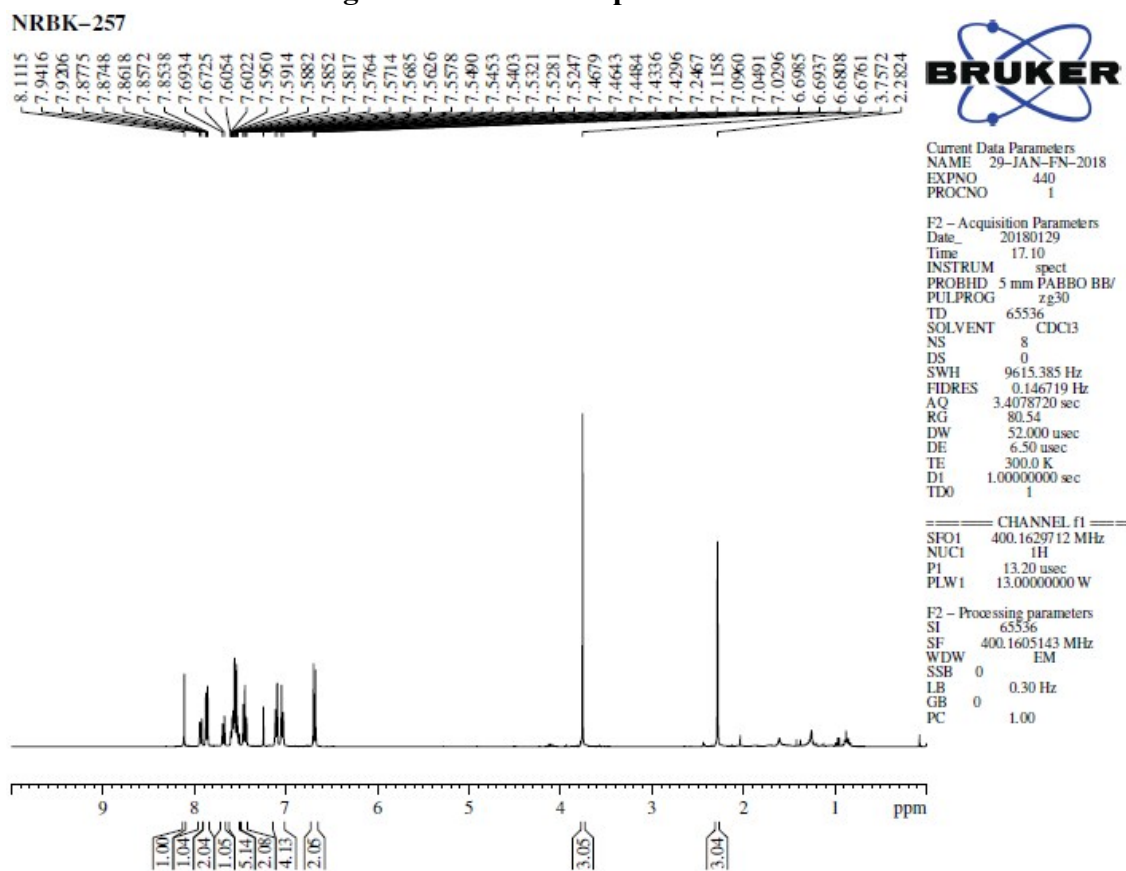

Figure 94:  $^1\text{H}$  NMR spectrum of 4a



NRBK-257

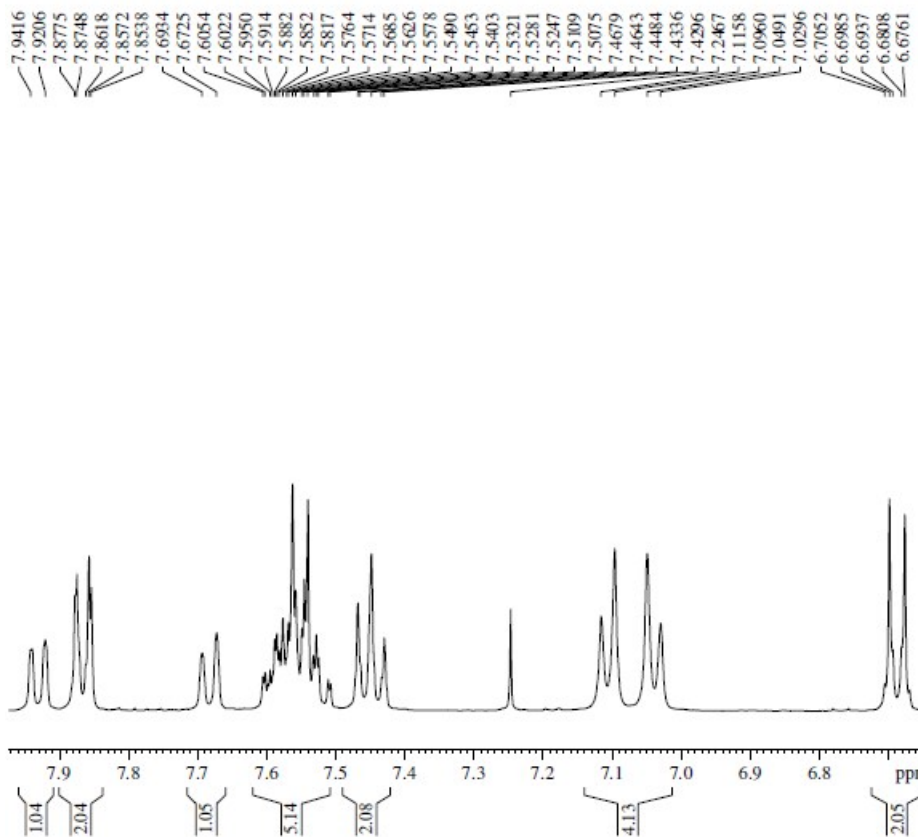

Figure 95: <sup>1</sup>H NMR spectrum of 4a (expansion)

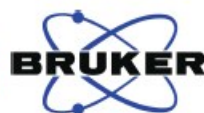

Current Data Parameters  
NAME 29-JAN-FN-2018  
EXPNO 440  
PROCNO 1

F2 - Acquisition Parameters  
Date\_ 20180129  
Time 17.10  
INSTRUM spect  
PROBHD 5 mm PABBO BE  
PULPROG zg30  
TD 65536  
SOLVENT CDCl3  
NS 8  
DS 0  
SWH 9615.385 Hz  
FIDRES 0.146719 Hz  
AQ 3.4078720 sec  
RG 80.54  
DW 52.000 usec  
DE 6.50 usec  
TE 300.0 K  
D1 1.0000000 sec  
TD0 1

==== CHANNEL f1 ====  
SFO1 400.1629712 MHz  
NUC1 1H  
P1 13.20 usec  
PLW1 13.00000000 W

F2 - Processing parameters  
SI 65536  
SF 400.1605143 MHz  
WDW EM  
SSB 0  
LB 0.30 Hz  
GB 0  
PC 1.00

NRBK-257

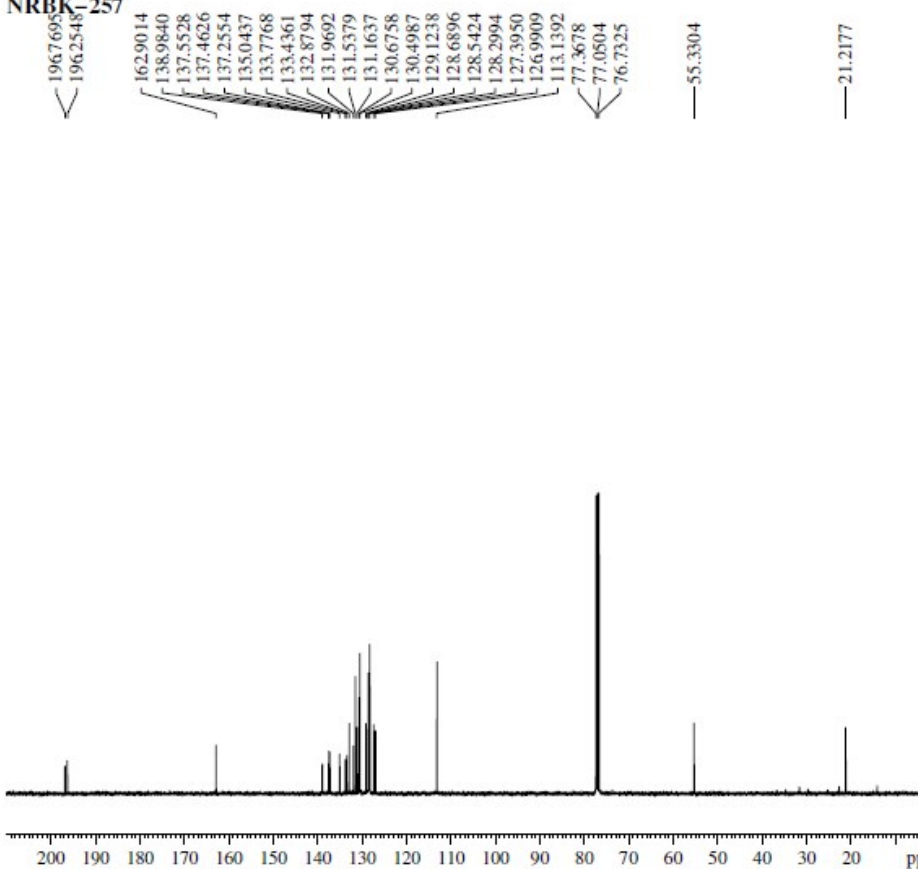

Figure 96: <sup>13</sup>C NMR spectrum of 4a

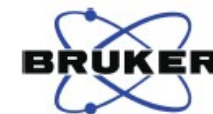

Current Data Parameters  
NAME 31-JAN-FN-2018  
EXPNO 330  
PROCNO 1

F2 - Acquisition Parameters  
Date\_ 20180201  
Time 1.38  
INSTRUM spect  
PROBHD 5 mm PABBO BB/  
PULPROG zgpg30  
TD 65536  
SOLVENT CDCl3  
NS 512  
DS 0  
SWH 24038.461 Hz  
FIDRES 0.366798 Hz  
AQ 1.3631488 sec  
RG 201.48  
DW 20.800 usec  
DE 6.50 usec  
TE 300.0 K  
D1 2.0000000 sec  
D11 0.03000000 sec  
TD0 1

==== CHANNEL f1 ====  
SFO1 100.6304993 MHz  
NUC1 13C  
P1 9.90 usec  
PLW1 53.00000000 W

==== CHANNEL f2 ====  
SFO2 400.1621006 MHz  
NUC2 1H  
PCPD2 waltz16  
PCPD2 90.00 usec  
PLW2 13.00000000 W  
PLW12 0.27963999 W  
PLW13 0.22651000 W

F2 - Processing parameters  
SI 32768  
SF 100.6204380 MHz  
WDW EM  
SSB 0  
LB 1.00 Hz  
GB 0  
PC 1.40

NRBK-249

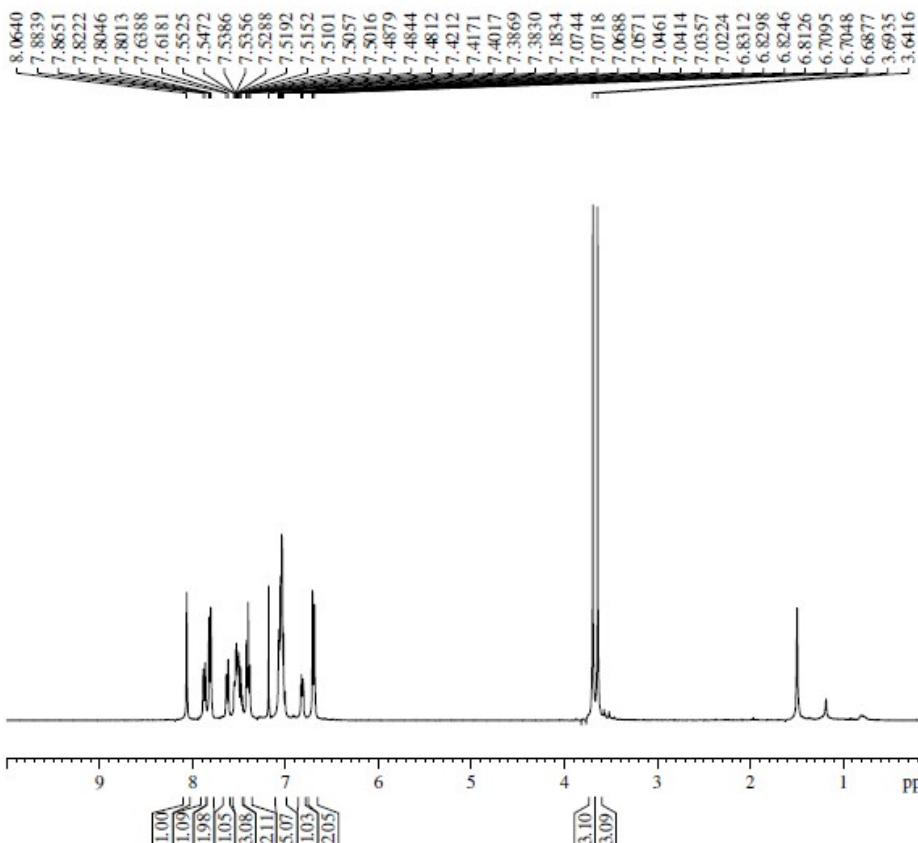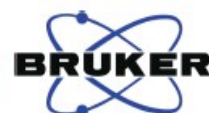

Current Data Parameters  
NAME 28-FEB-FN-2018  
EXPNO 310  
PROCNO 1

F2 - Acquisition Parameters  
Date\_ 20180228  
Time 16.29  
INSTRUM spect  
PROBHD 5 mm PABBO BB/  
PULPROG zg30  
TD 65536  
SOLVENT CDCl3  
NS 8  
DS 0  
SWH 9615.385 Hz  
FIDRES 0.146719 Hz  
AQ 3.4078720 sec  
RG 129.57  
DW 52.000 usec  
DE 6.50 usec  
TE 300.0 K  
D1 1.00000000 sec  
TD0 1

==== CHANNEL f1 ====  
SFO1 400.1629712 MHz  
NUC1 1H  
P1 13.20 usec  
PLW1 13.00000000 W

F2 - Processing parameters  
SI 65536  
SF 400.1605401 MHz  
WDW EM  
SSB 0  
LB 0.30 Hz  
GB 0  
PC 1.00

Figure 97: <sup>1</sup>H NMR spectrum of 4b

NRBK-249

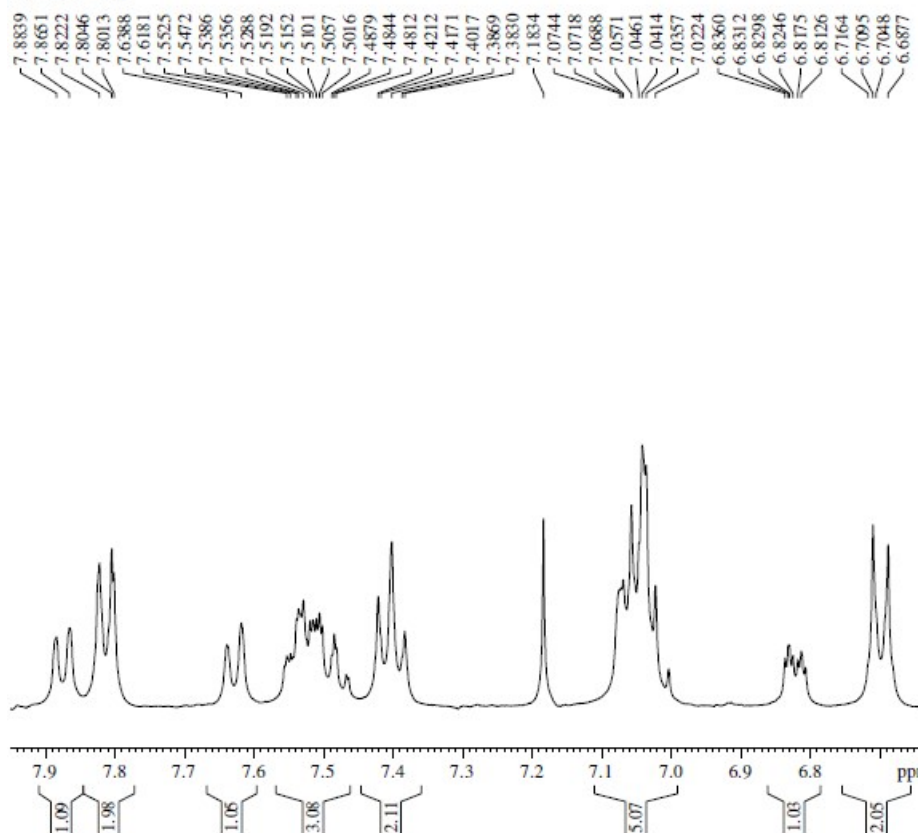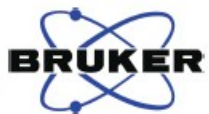

Current Data Parameters  
NAME 28-FEB-FN-2018  
EXPNO 310  
PROCNO 1

F2 - Acquisition Parameters  
Date\_ 20180228  
Time 16.29  
INSTRUM spect  
PROBHD 5 mm PABBO BB  
PULPROG zg30  
TD 65536  
SOLVENT CDCl3  
NS 8  
DS 0  
SWH 9615.385 Hz  
FIDRES 0.146719 Hz  
AQ 3.4078720 sec  
RG 129.57  
DW 52.000 usec  
DE 6.50 usec  
TE 300.0 K  
D1 1.00000000 sec  
TD0 1

==== CHANNEL f1 ====  
SFO1 400.1629712 MHz  
NUC1 1H  
P1 13.20 usec  
PLW1 13.00000000 W

F2 - Processing parameters  
SI 65536  
SF 400.1605401 MHz  
WDW EM  
SSB 0  
LB 0.30 Hz  
GB 0  
PC 1.00

Figure 98: <sup>1</sup>H NMR spectrum of 4b (expansion)

NRBK-249

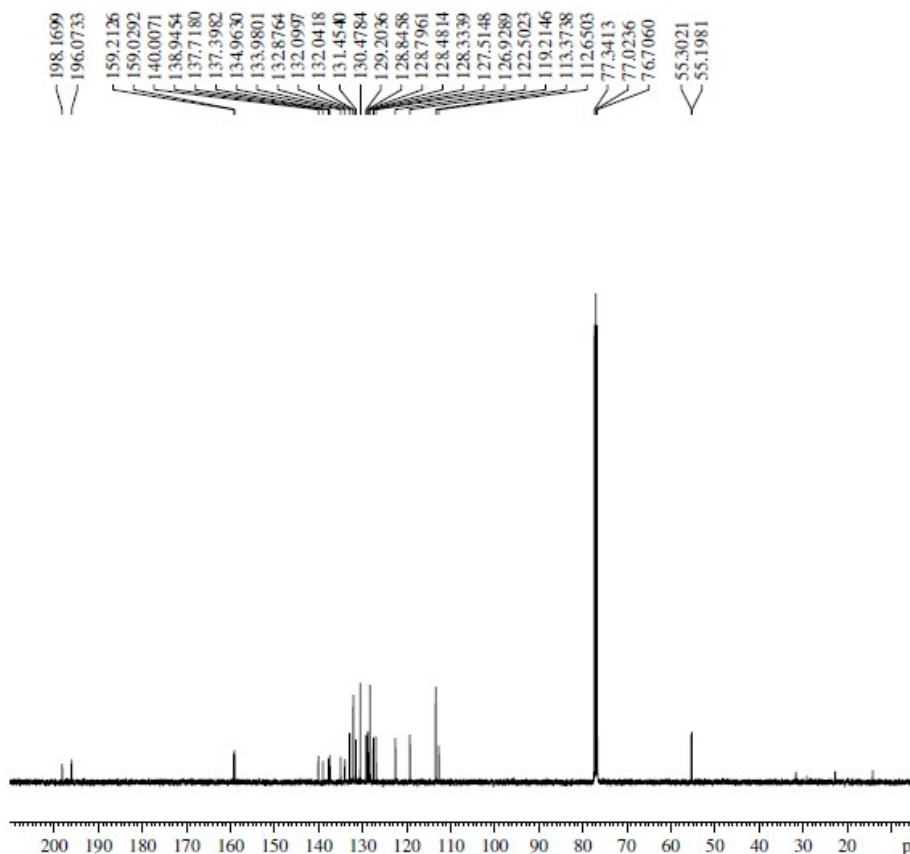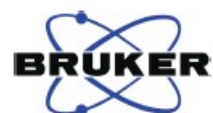

Current Data Parameters  
 NAME 24-JAN-FN-2018  
 EXPNO 310  
 PROCNO 1

F2 - Acquisition Parameters  
 Date\_ 20180124  
 Time 17.31  
 INSTRUM spect  
 PROBHD 5 mm PABBO BB/  
 PULPROG zgpg30  
 TD 65536  
 SOLVENT CDCl3  
 NS 512  
 DS 0  
 SWH 24038.461 Hz  
 FIDRES 0.366798 Hz  
 AQ 1.3631488 sec  
 RG 201.48  
 DW 20.800 usec  
 DE 6.50 usec  
 TE 300.0 K  
 D1 2.00000000 sec  
 D11 0.03000000 sec  
 TD0 1

==== CHANNEL f1 ====  
 SFO1 100.6304993 MHz  
 NUC1 13C  
 P1 9.90 usec  
 PLW1 53.0000000 W

==== CHANNEL f2 ====  
 SFO2 400.1621006 MHz  
 NUC2 1H  
 CPDPRG2 waltz16  
 PCPD2 90.00 usec  
 PLW2 13.0000000 W  
 PLW12 0.27963999 W  
 PLW13 0.22651000 W

F2 - Processing parameters  
 SI 32768  
 SF 100.6204380 MHz  
 WDW EM  
 SSB 0  
 LB 1.00 Hz  
 GB 0  
 PC 1.40

Figure 99: <sup>13</sup>C NMR spectrum of 4b

NRBK-229

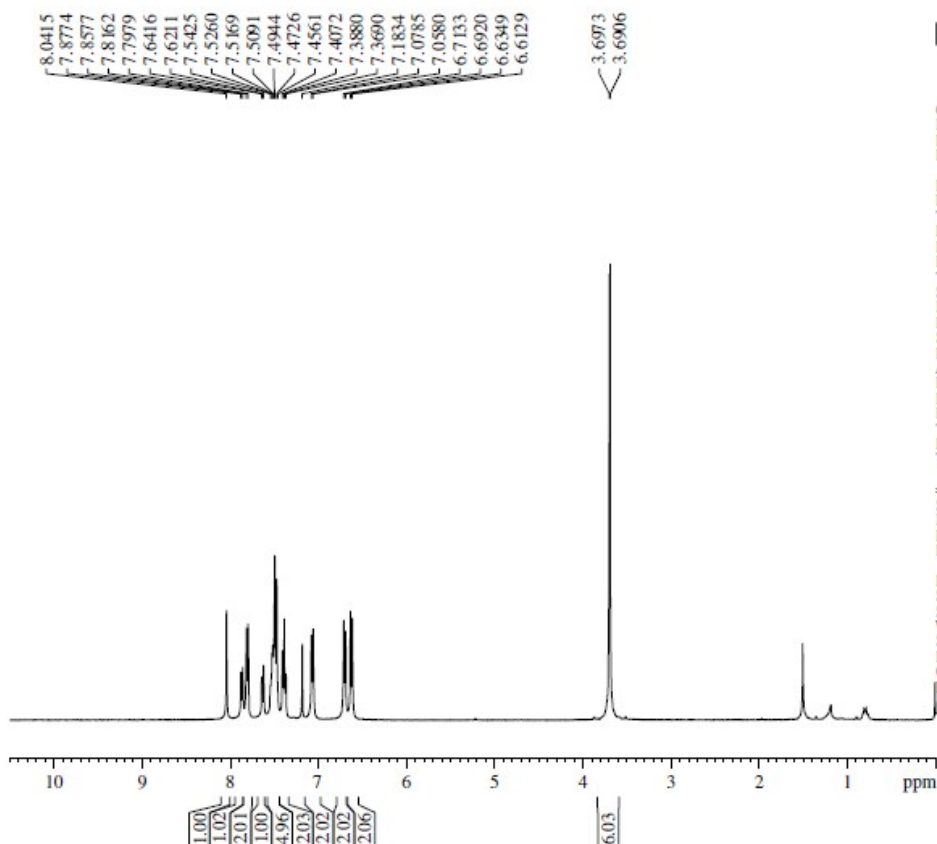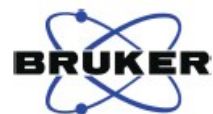

Current Data Parameters  
 NAME 12-FEB-FN-2018  
 EXPNO 310  
 PROCNO 1

F2 - Acquisition Parameters  
 Date\_ 20180212  
 Time 16.52  
 INSTRUM spect  
 PROBHD 5 mm PABBO BB/  
 PULPROG zg30  
 TD 65536  
 SOLVENT CDCl3  
 NS 8  
 DS 0  
 SWH 9615.385 Hz  
 FIDRES 0.146719 Hz  
 AQ 3.4078720 sec  
 RG 114.26  
 DW 52.000 usec  
 DE 6.50 usec  
 TE 300.0 K  
 D1 1.00000000 sec  
 TD0 1

==== CHANNEL f1 ====  
 SFO1 400.1629712 MHz  
 NUC1 1H  
 P1 13.20 usec  
 PLW1 13.0000000 W

F2 - Processing parameters  
 SI 65536  
 SF 400.1605397 MHz  
 WDW EM  
 SSB 0  
 LB 0.30 Hz  
 GB 0  
 PC 1.00

Figure 100: <sup>1</sup>H NMR spectrum of 4c

NRBK-229

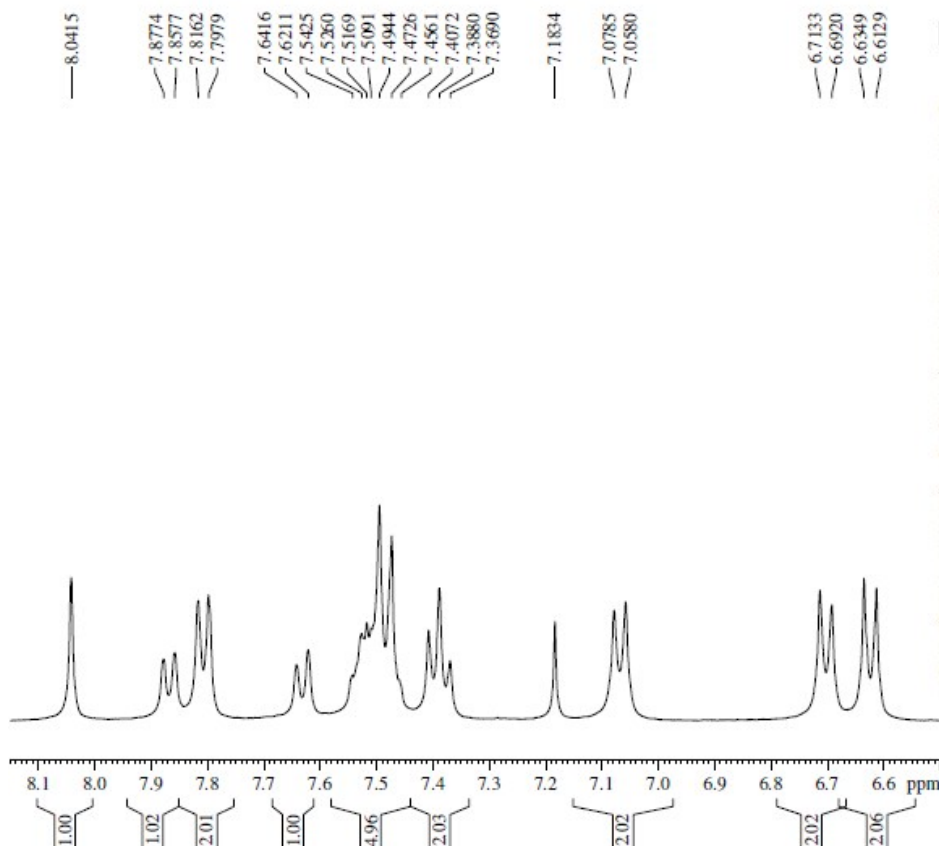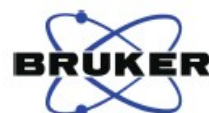

Current Data Parameters  
 NAME 12-FEB-FN-2018  
 EXPNO 310  
 PROCNO 1

F2 - Acquisition Parameters  
 Date\_ 20180212  
 Time 16.52  
 INSTRUM spect  
 PROBHD 5 mm PABBO BB/  
 PULPROG zg30  
 TD 65536  
 SOLVENT CDCl3  
 NS 8  
 DS 0  
 SWH 9615.385 Hz  
 FIDRES 0.146719 Hz  
 AQ 3.4078720 sec  
 RG 114.26  
 DW 52.000 usec  
 DE 6.50 usec  
 TE 300.0 K  
 D1 1.0000000 sec  
 TD0 1

==== CHANNEL f1 ====  
 SFO1 400.1629712 MHz  
 NUC1 1H  
 P1 13.20 usec  
 PLW1 13.00000000 W

F2 - Processing parameters  
 SI 65536  
 SF 400.1605397 MHz  
 WDW EM  
 SSB 0  
 LB 0.30 Hz  
 GB 0  
 PC 1.00

Figure 101: <sup>1</sup>H NMR spectrum of 4c (expansion)

NRBK-229

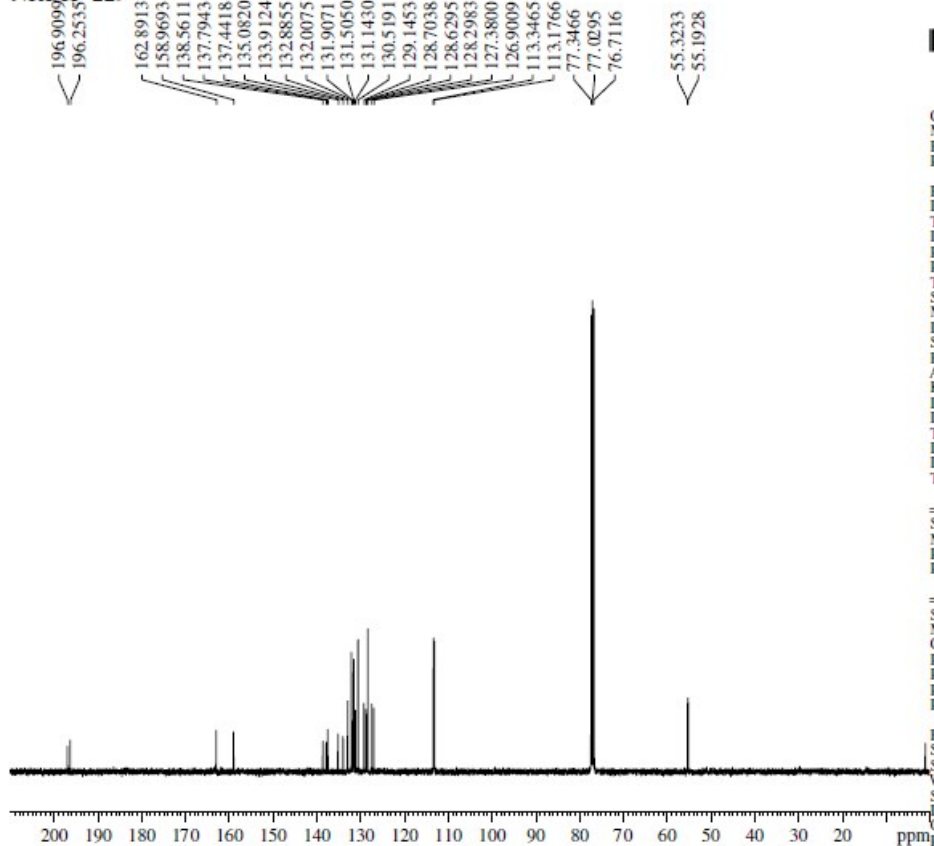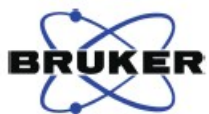

Current Data Parameters  
 NAME 31-JAN-FN-2018  
 EXPNO 350  
 PROCNO 1

F2 - Acquisition Parameters  
 Date\_ 20180201  
 Time 2.11  
 INSTRUM spect  
 PROBHD 5 mm PABBO BB/  
 PULPROG zgpg30  
 TD 65536  
 SOLVENT CDCl3  
 NS 512  
 DS 0  
 SWH 24038.461 Hz  
 FIDRES 0.366798 Hz  
 AQ 1.3631488 sec  
 RG 201.48  
 DW 20.800 usec  
 DE 6.50 usec  
 TE 300.0 K  
 D1 2.0000000 sec  
 D11 0.03000000 sec  
 TD0 1

==== CHANNEL f1 ====  
 SFO1 100.6304993 MHz  
 NUC1 13C  
 P1 9.90 usec  
 PLW1 53.00000000 W

==== CHANNEL f2 ====  
 SFO2 400.1621006 MHz  
 NUC2 1H  
 CPDPRG2 waltz16  
 PCPD2 90.00 usec  
 PLW2 13.00000000 W  
 PLW12 0.27963999 W  
 PLW13 0.22651000 W

F2 - Processing parameters  
 SI 32768  
 SF 100.6204380 MHz  
 WDW EM  
 SSB 0  
 LB 1.00 Hz  
 GB 0  
 PC 1.40

Figure 102: <sup>13</sup>C NMR spectrum of 4c

NRBK-250

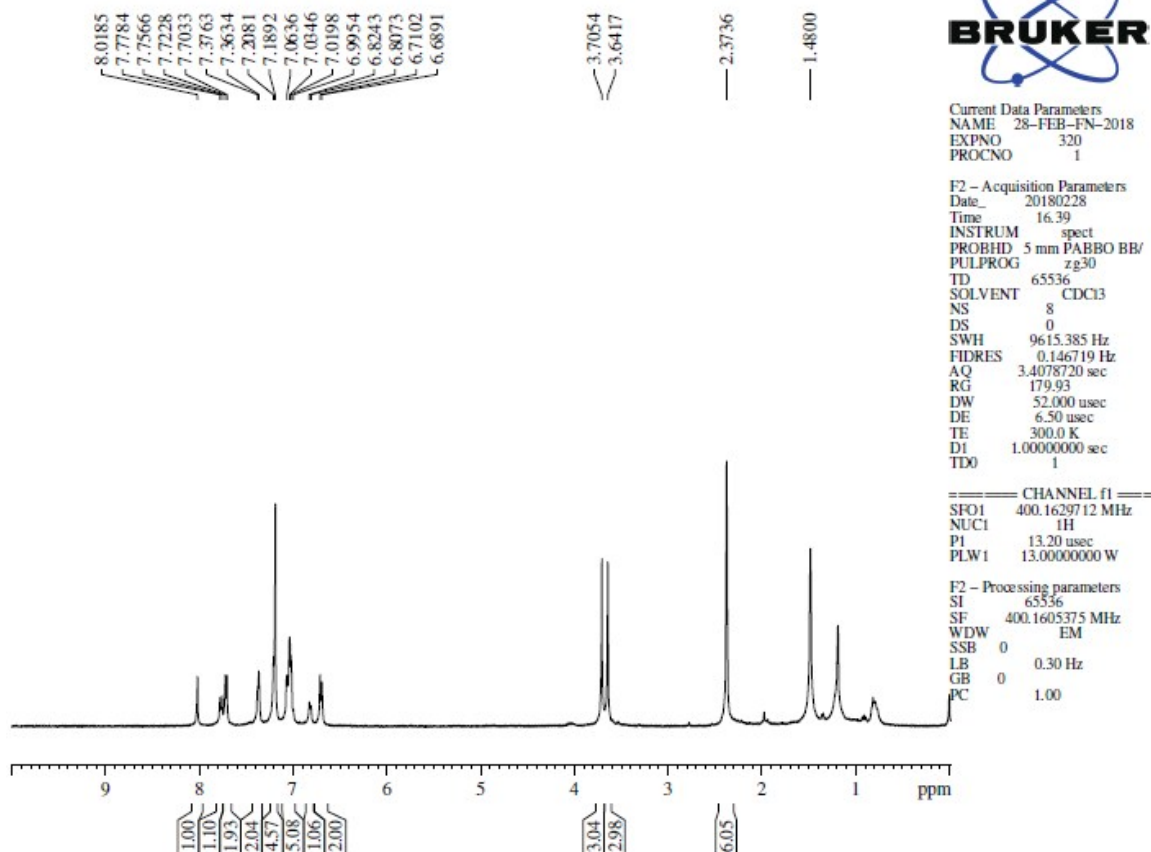

Figure 103: <sup>1</sup>H NMR spectrum of 4d

NRBK-250

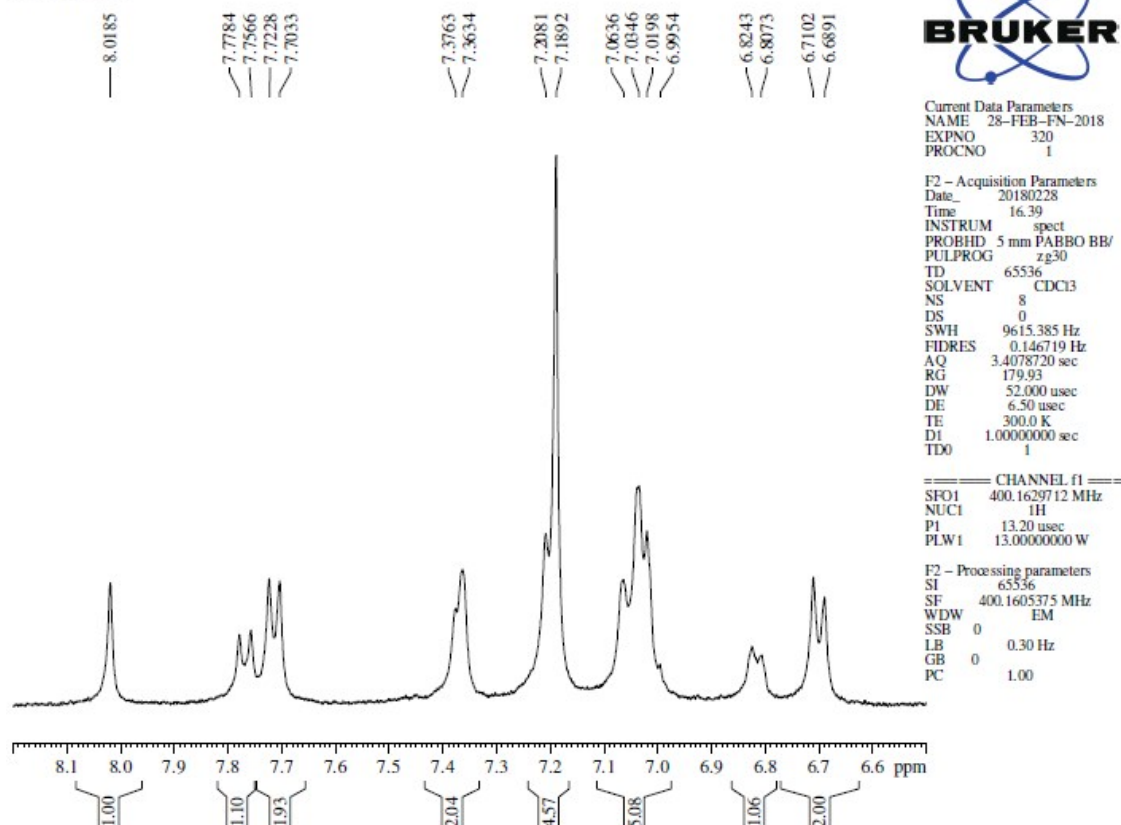

Figure 104: <sup>1</sup>H NMR spectrum of 4d (expansion)

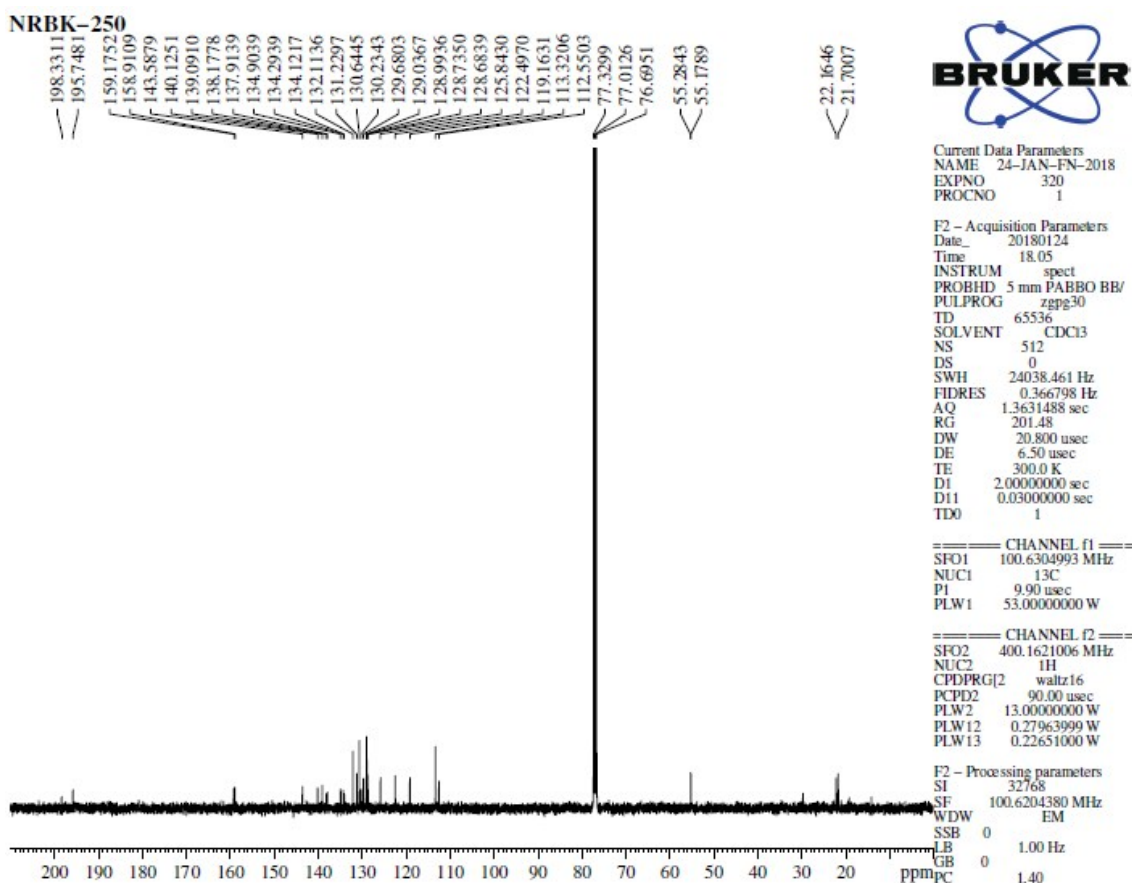

Figure 105: <sup>13</sup>C NMR spectrum of 4d

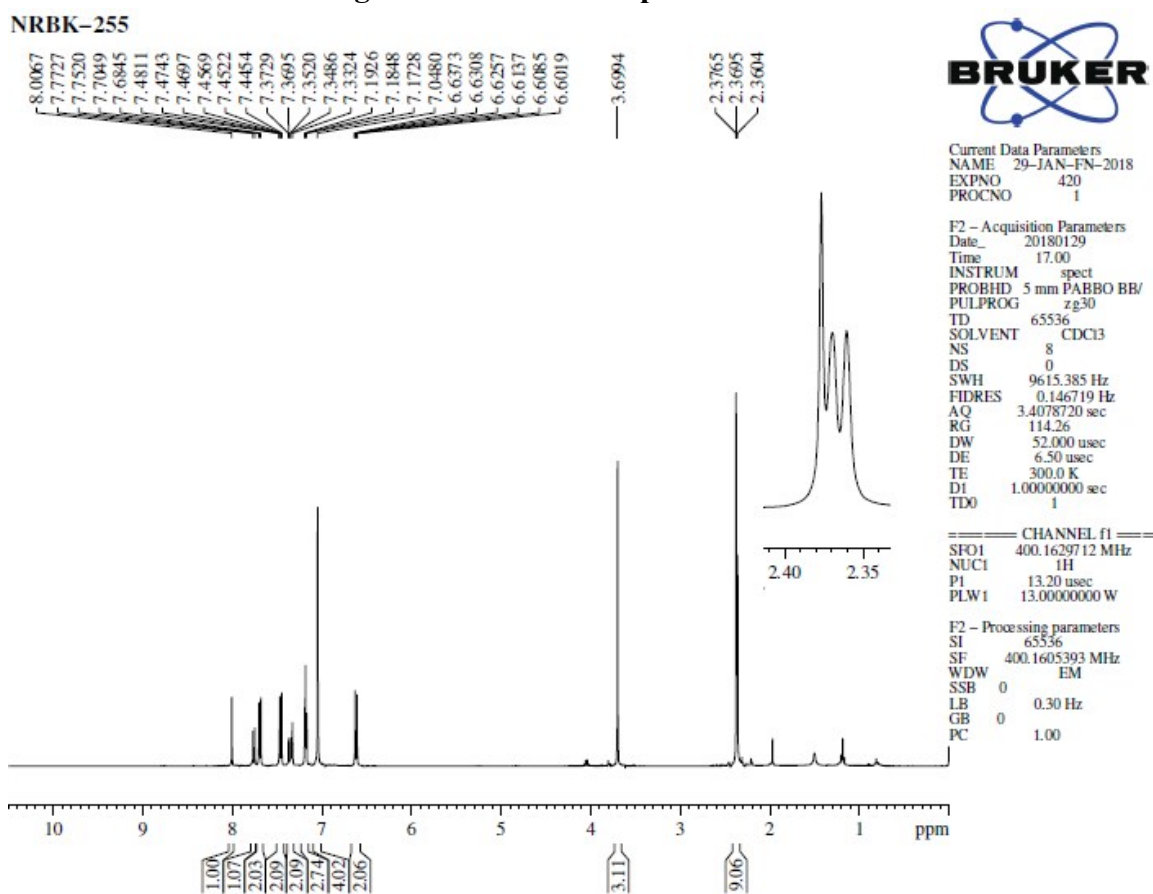

Figure 106: <sup>1</sup>H NMR spectrum of 4e

NRBK-255

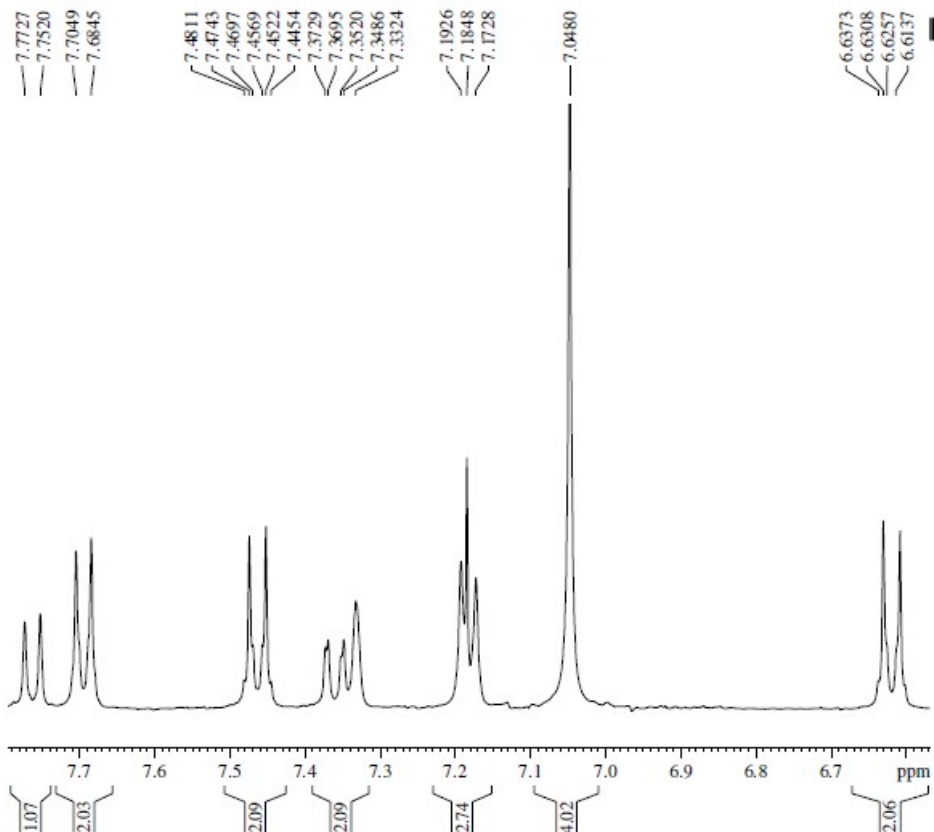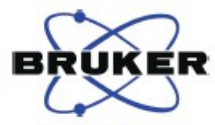

Current Data Parameters  
 NAME 29-JAN-FN-2018  
 EXPNO 420  
 PROCNO 1

F2 - Acquisition Parameters  
 Date\_ 20180129  
 Time 17.00  
 INSTRUM spect  
 PROBHD 5 mm PABBO BB/  
 PULPROG zg30  
 TD 65536  
 SOLVENT CDCl3  
 NS 8  
 DS 0  
 SWH 9615.385 Hz  
 FIDRES 0.146719 Hz  
 AQ 3.4078720 sec  
 RG 114.26  
 DW 52.000 usec  
 DE 6.50 usec  
 TE 300.0 K  
 D1 1.00000000 sec  
 TD0 1

==== CHANNEL f1 ====  
 SFO1 400.1629712 MHz  
 NUC1 1H  
 P1 13.20 usec  
 PLW1 13.00000000 W

F2 - Processing parameters  
 SI 65536  
 SF 400.1605393 MHz  
 WDW EM  
 SSB 0  
 LB 0.30 Hz  
 GB 0  
 PC 1.00

Figure 107: <sup>1</sup>H NMR spectrum of 4e (expansion)

NRBK-255

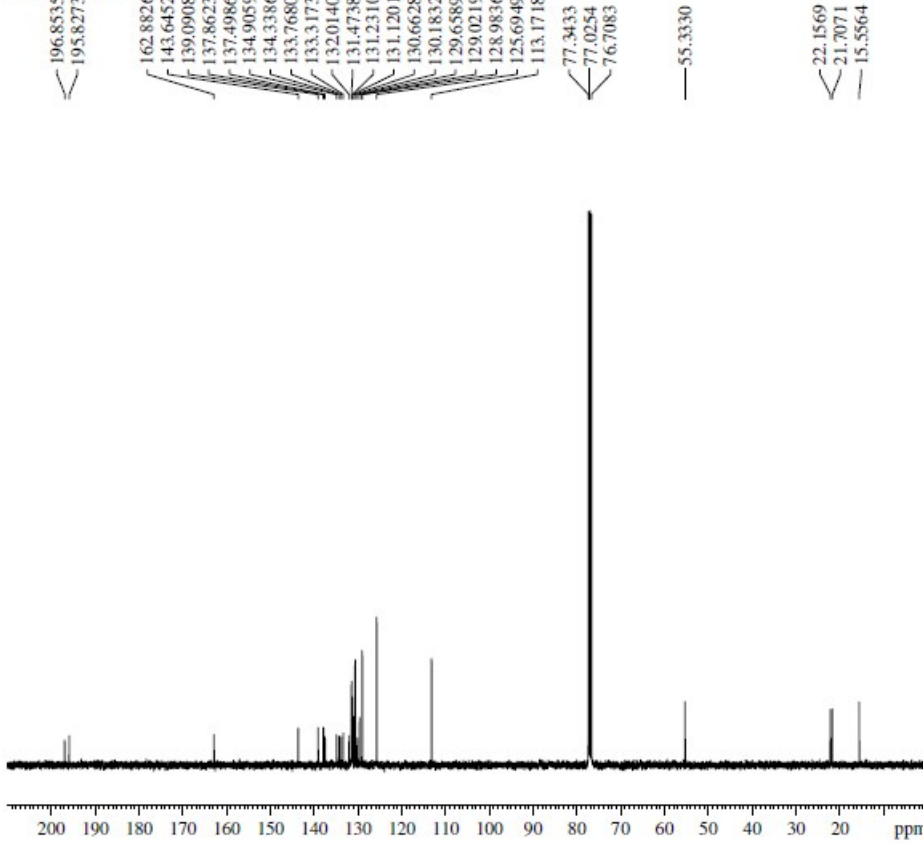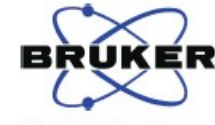

Current Data Parameters  
 NAME 31-JAN-FN-2018  
 EXPNO 320  
 PROCNO 1

F2 - Acquisition Parameters  
 Date\_ 20180201  
 Time 1.04  
 INSTRUM spect  
 PROBHD 5 mm PABBO BB/  
 PULPROG zgpg30  
 TD 65536  
 SOLVENT CDCl3  
 NS 512  
 DS 0  
 SWH 24038.461 Hz  
 FIDRES 0.366798 Hz  
 AQ 1.3631488 sec  
 RG 201.48  
 DW 20.800 usec  
 DE 6.50 usec  
 TE 300.0 K  
 D1 2.00000000 sec  
 D11 0.03000000 sec  
 TD0 1

==== CHANNEL f1 ====  
 SFO1 100.6304993 MHz  
 NUC1 13C  
 P1 9.90 usec  
 PLW1 53.00000000 W

==== CHANNEL f2 ====  
 SFO2 400.1621006 MHz  
 NUC2 1H  
 CDPDRG[2] waltz16  
 PCPD2 90.00 usec  
 PLW2 13.00000000 W  
 PLW12 0.27963999 W  
 PLW13 0.22651000 W

F2 - Processing parameters  
 SI 32768  
 SF 100.6204380 MHz  
 WDW EM  
 SSB 0  
 LB 1.00 Hz  
 GB 0  
 PC 1.40

Figure 108: <sup>13</sup>C NMR spectrum of 4e

NRBK-272-major

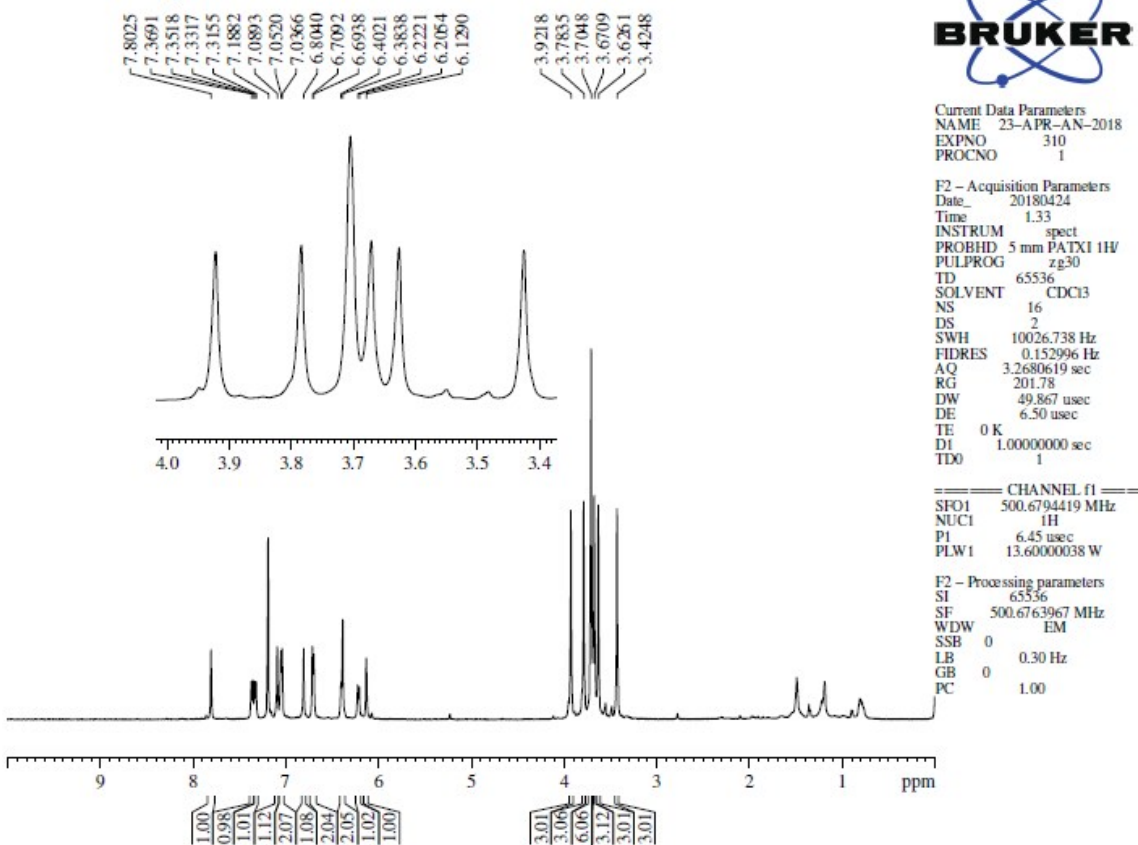

Figure 109: <sup>1</sup>H NMR spectrum of 4f

NRBK-272-major

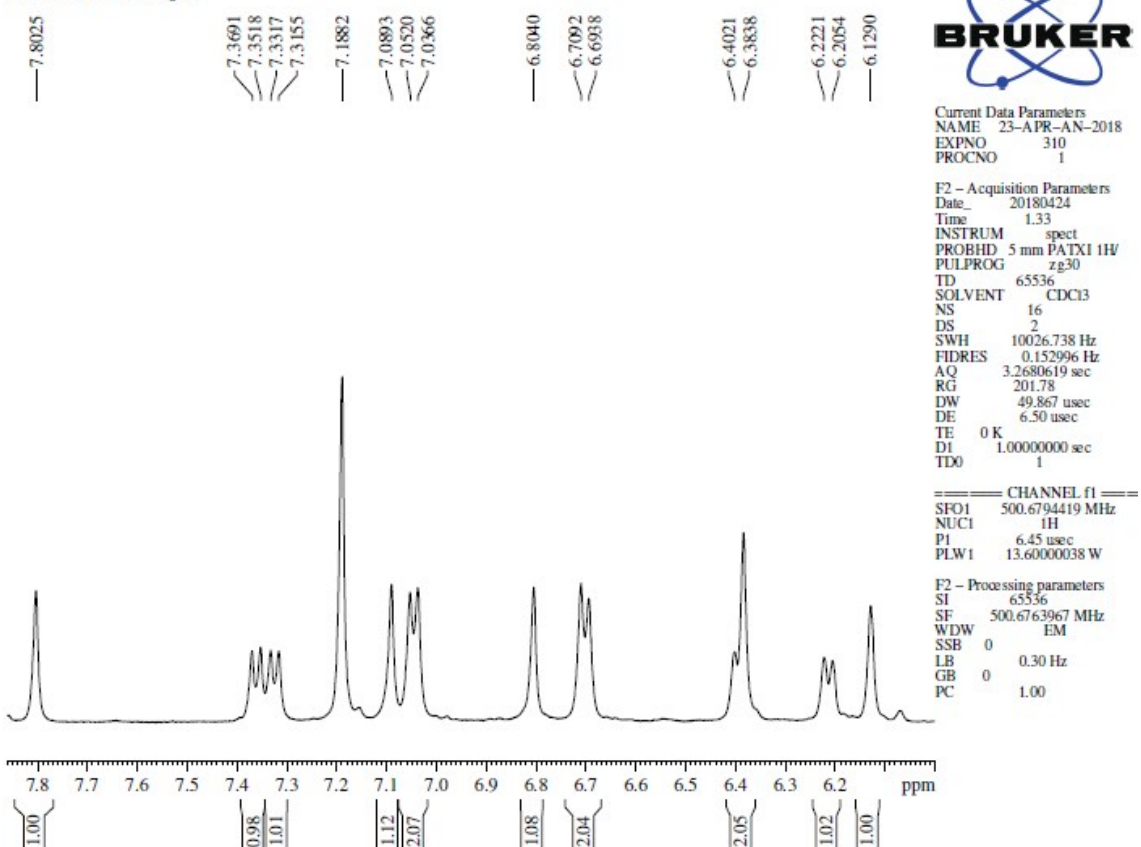

Figure 110: <sup>1</sup>H NMR spectrum of 4f (expansion)



NRBK-272-Major

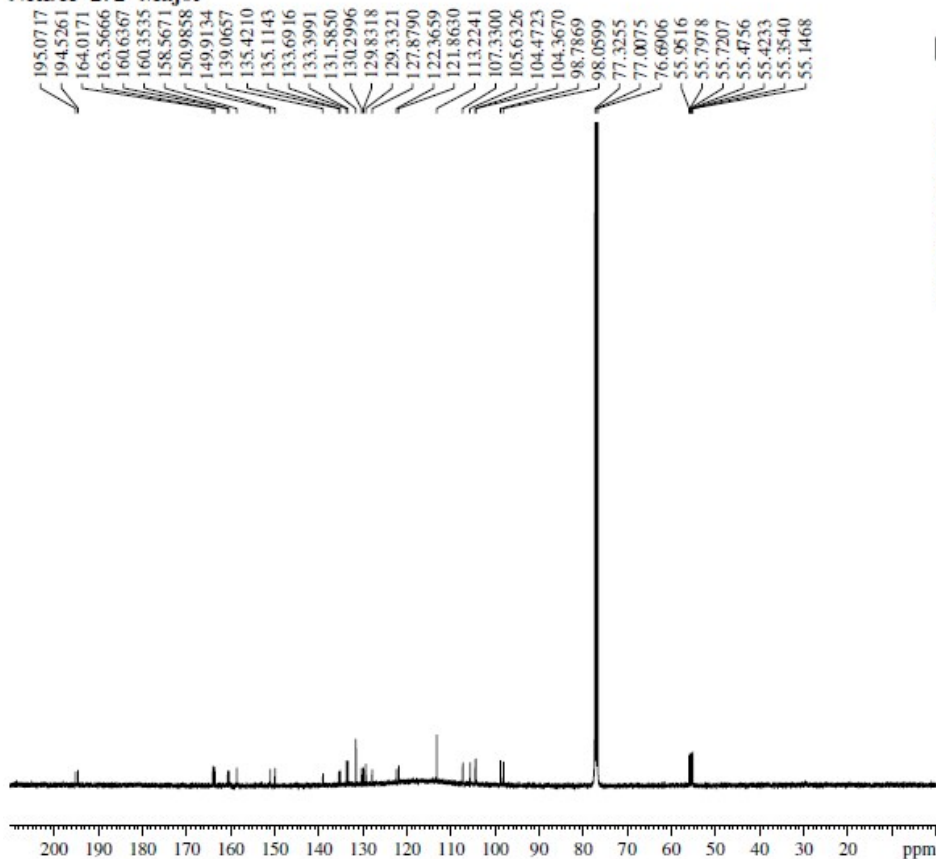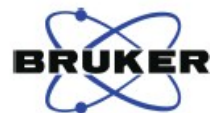

Current Data Parameters  
 NAME 11-May-FN-2018  
 EXPNO 310  
 PROCNO 1

F2 - Processing parameters  
 SI 32768  
 SF 100.6569230 MHz  
 WDW EM  
 SSB 0  
 LB 1.00 Hz  
 GB 0  
 PC 1.40

Figure 111: <sup>13</sup>C NMR spectrum of 4f

NRBK-272-Minor

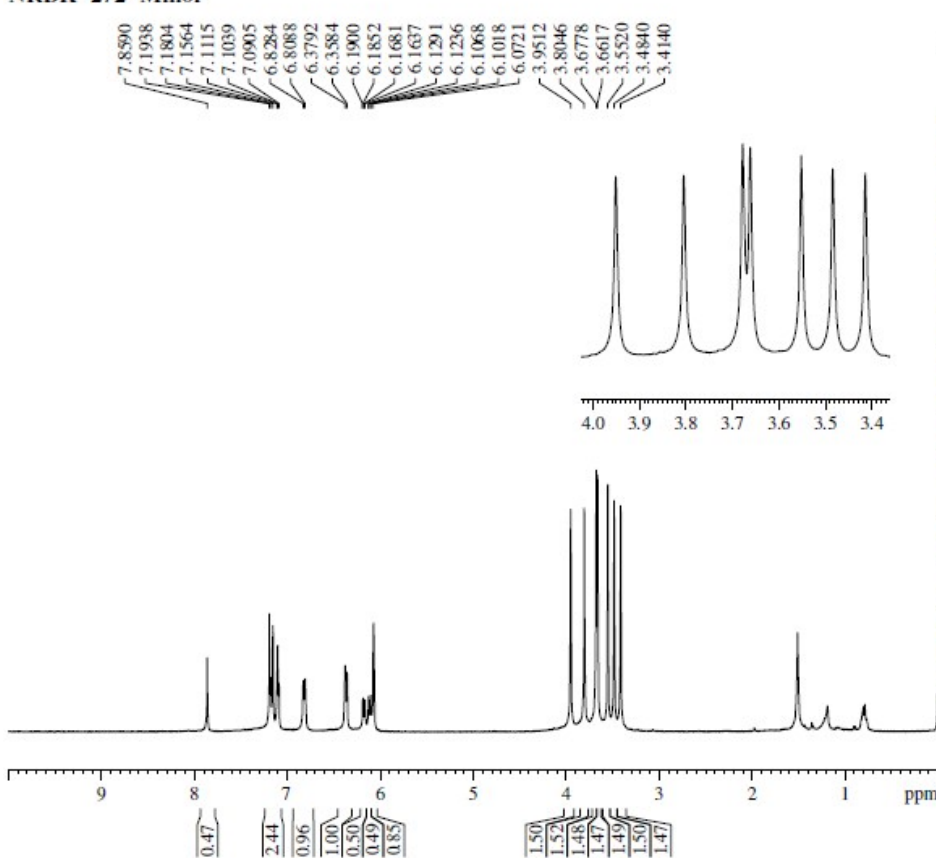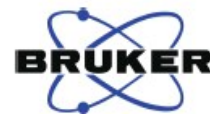

Current Data Parameters  
 NAME 08-Mar-FN-2018  
 EXPNO 330  
 PROCNO 1

F2 - Acquisition Parameters  
 Date\_ 20180308  
 Time 15.56  
 INSTRUM spect  
 PROBHD 5 mm PABBO BB/  
 PULPROG zg30  
 TD 65536  
 SOLVENT CDC13  
 NS 8  
 DS 0  
 SWH 9615.385 Hz  
 FIDRES 0.146719 Hz  
 AQ 3.4078720 sec  
 RG 145.29  
 DW 52.000 usec  
 DE 6.50 usec  
 TE 300.0 K  
 DI 1.00000000 sec  
 TD0 1

==== CHANNEL f1 ====  
 SFO1 400.1629712 MHz  
 NUC1 1H  
 P1 13.20 usec  
 PLW1 13.00000000 W

F2 - Processing parameters  
 SI 65536  
 SF 400.1605358 MHz  
 WDW EM  
 SSB 0  
 LB 0.30 Hz  
 GB 0  
 PC 1.00

Figure 112: <sup>1</sup>H NMR spectrum of 4g

NRBK-272-minor

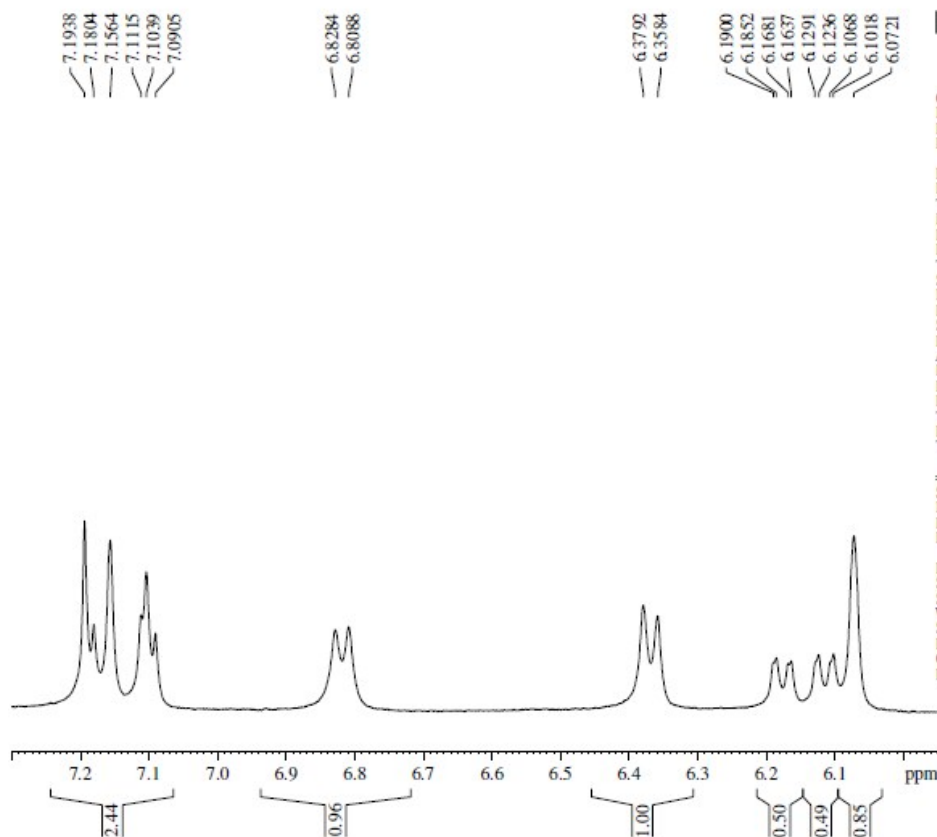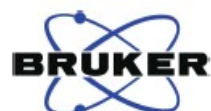

Current Data Parameters  
NAME 08-Mar-FN-2018  
EXPNO 330  
PROCNO 1

F2 - Acquisition Parameters  
Date\_ 20180308  
Time 15.56  
INSTRUM spect  
PROBHD 5 mm PABBO BB/  
PULPROG zg30  
TD 65536  
SOLVENT CDCl3  
NS 8  
DS 0  
SWH 9615.385 Hz  
FIDRES 0.146719 Hz  
AQ 3.4078720 sec  
RG 145.29  
DW 52.000 usec  
DE 6.50 usec  
TE 300.0 K  
D1 1.00000000 sec  
TD0 1

==== CHANNEL f1 ====  
SFO1 400.1629712 MHz  
NUC1 1H  
P1 13.20 usec  
PLW1 13.00000000 W

F2 - Processing parameters  
SI 65536  
SF 400.1605358 MHz  
WDW EM  
SSB 0  
LB 0.30 Hz  
GB 0  
PC 1.00

Figure 113: <sup>1</sup>H NMR spectrum of 4g (expansion)

NRBK-272-Minor

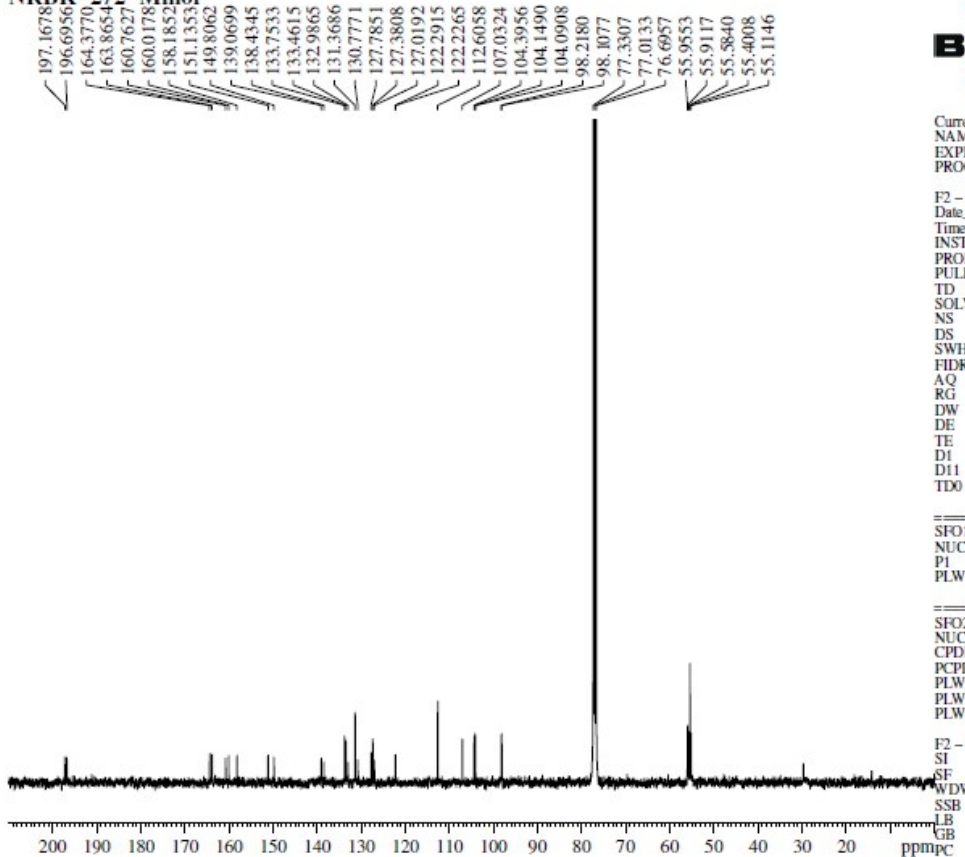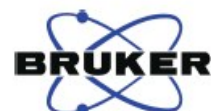

Current Data Parameters  
NAME 06-Mar-AN-2018  
EXPNO 320  
PROCNO 1

F2 - Acquisition Parameters  
Date\_ 20180307  
Time 18.10  
INSTRUM spect  
PROBHD 5 mm PABBO BB/  
PULPROG zgpg30  
TD 65536  
SOLVENT CDCl3  
NS 4096  
DS 0  
SWH 24038.461 Hz  
FIDRES 0.366798 Hz  
AQ 1.3631488 sec  
RG 201.48  
DW 20.800 usec  
DE 6.50 usec  
TE 300.0 K  
D1 2.00000000 sec  
D11 0.03000000 sec  
TD0 1

==== CHANNEL f1 ====  
SFO1 100.6304993 MHz  
NUC1 13C  
P1 9.90 usec  
PLW1 53.00000000 W

==== CHANNEL f2 ====  
SFO2 400.1621006 MHz  
NUC2 1H  
CPDPRG2 waltz16  
PCPD2 90.00 usec  
PLW2 13.00000000 W  
PLW12 0.27963999 W  
PLW13 0.22651000 W

F2 - Processing parameters  
SI 32768  
SF 100.6204380 MHz  
WDW EM  
SSB 0  
LB 3.00 Hz  
GB 0  
PC 1.40

re 114: <sup>13</sup>C NMR spectrum of 4g

Fig
